# Supplementary material for: Calix[6]arene-Based [3]Rotaxanes as Prototypes for the Template Synthesis of Molecular Capsules
Source: MDPI journal article supplement (doi:10.3390/molecules28020595), 2023-01-06
Supplement: s1 [file s1]

# Supporting Material

## Calix[6]arene-based [3]rotaxanes as prototypes for the template synthesis of molecular capsules

Federica Cester Bonati,<sup>1</sup> Margherita Bazzoni,<sup>1</sup> Caterina Baccini,<sup>1</sup> Valeria Zanichelli,<sup>1</sup> Guido Orlandini,<sup>1</sup> Arturo Arduini,<sup>1</sup> Gianpiero Cera,<sup>1</sup> and Andrea Secchi<sup>1,\*</sup>

<sup>1</sup> Dipartimento di Scienze Chimiche, della Vita e della Sostenibilità Ambientale, Università di Parma, Parco Area delle Scienze 17/A, I-43124 Parma, Italy

\* Correspondence: andrea.secchi@unipr.it; Tel.: +39-0521 905 409.

## *Table of Contents*

|                                                          |    |
|----------------------------------------------------------|----|
| Characterisation of bis-viologen axle $4_{12}$ .....     | 3  |
| Characterisation of bis-viologen axle $5_6$ .....        | 5  |
| Characterisation of bis-viologen axle $5_{12}$ .....     | 7  |
| Characterisation of 11 .....                             | 9  |
| Characterisation of 13 .....                             | 10 |
| Characterisation of TPU-ES .....                         | 11 |
| Characterisation of TPU-OTBS .....                       | 15 |
| Characterisation of $P[(TPU)_2 \supset 5_6]$ .....       | 19 |
| Characterisation of $P[(TPU)_2 \supset 5_{12}]$ .....    | 21 |
| Characterisation of $R[(TPU)_2 \supset 6_{12}]$ .....    | 24 |
| Characterisation of $R[(TPU)_2 \supset 7_{12}]$ .....    | 28 |
| Characterisation of $R[(TPU)_2 \supset 8_{12}]$ .....    | 32 |
| Characterisation of $P[(TPU-ES)_2 \supset 5_{12}]$ ..... | 37 |
| Characterisation of $R[(TPU-ES)_2 \supset 7_{12}]$ ..... | 39 |
| Characterisation of $R[(TPU-ES)_2 \supset 8_{12}]$ ..... | 43 |
| Characterisation of $R[(TPU-Ac)_2 \supset 7_{12}]$ ..... | 48 |

## Characterisation of bis-viologen axle 4<sub>12</sub>

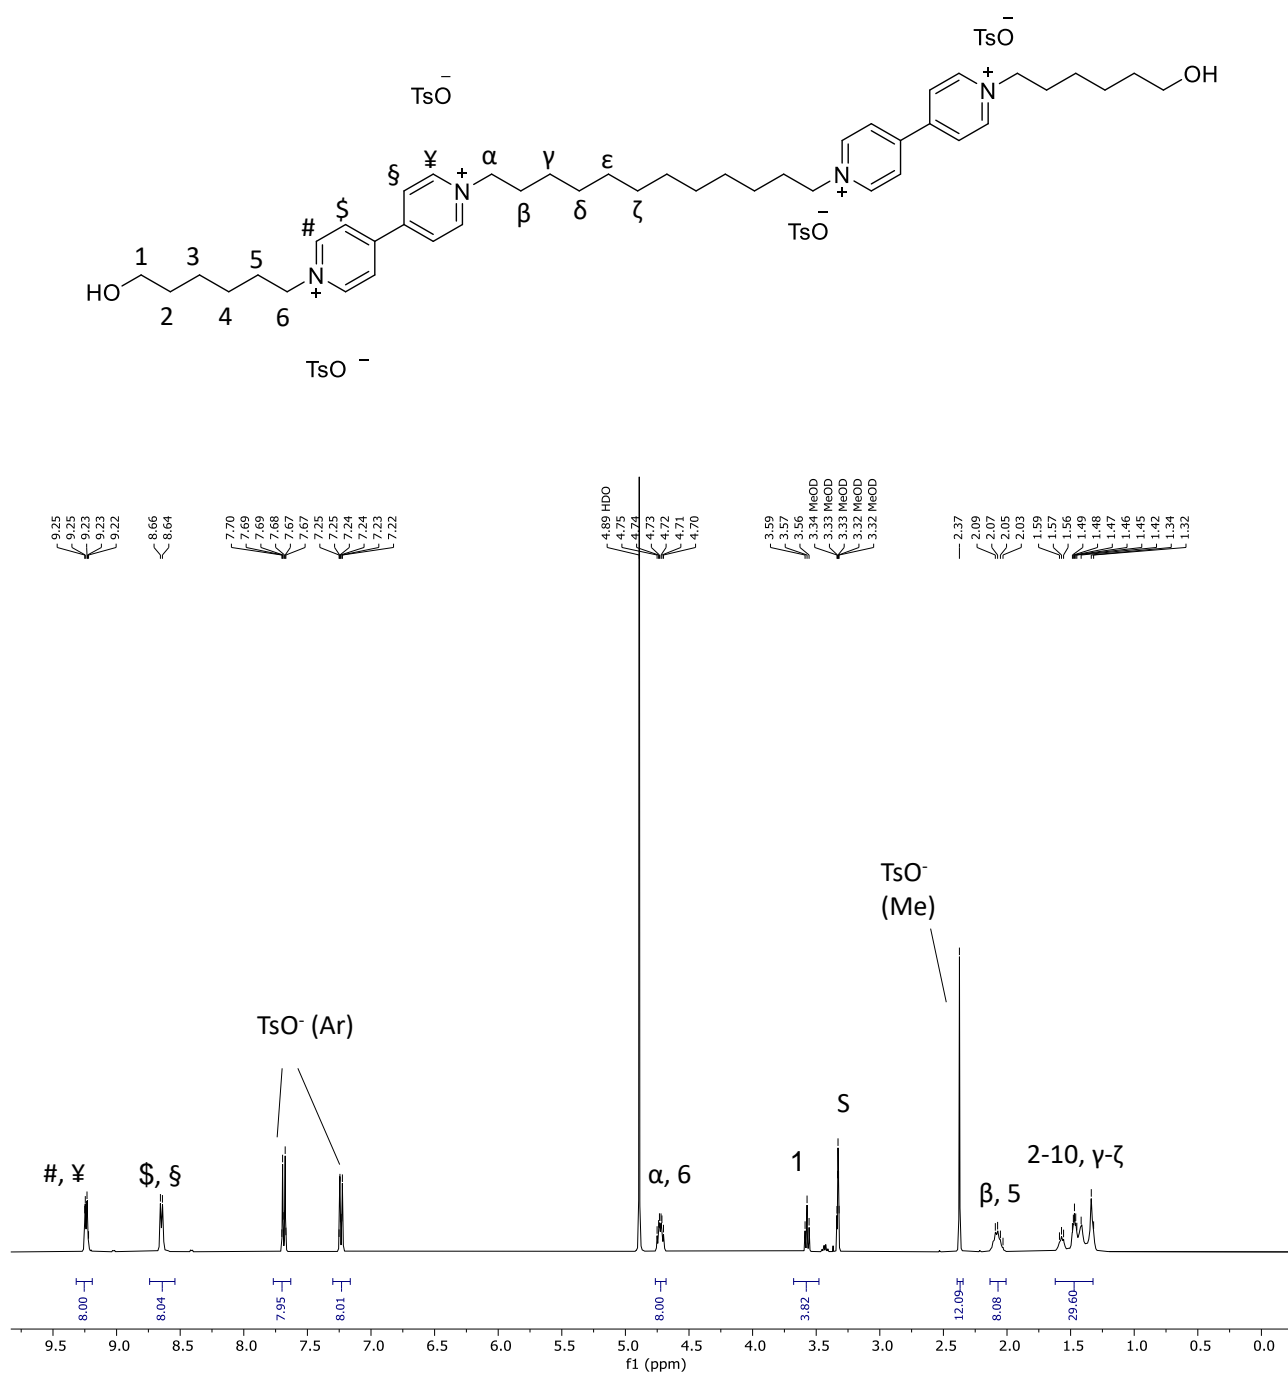

**Figure S1:** <sup>1</sup>H NMR spectrum (400 MHz, CD<sub>3</sub>OD) of compound 4<sub>12</sub>.

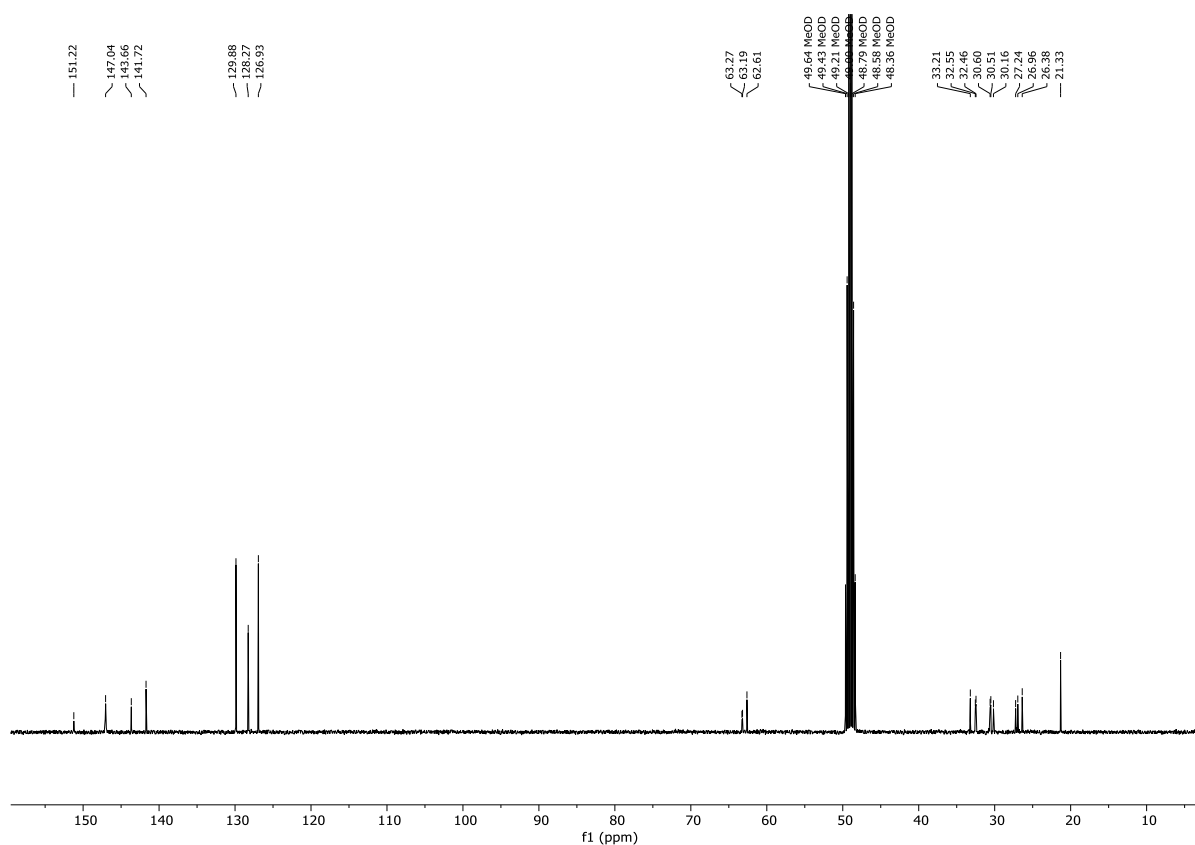

**Figure S2:** <sup>13</sup>C NMR spectrum (100 MHz, CD<sub>3</sub>OD) of compound 412.

## Characterisation of bis-viologen axle 5<sub>6</sub>

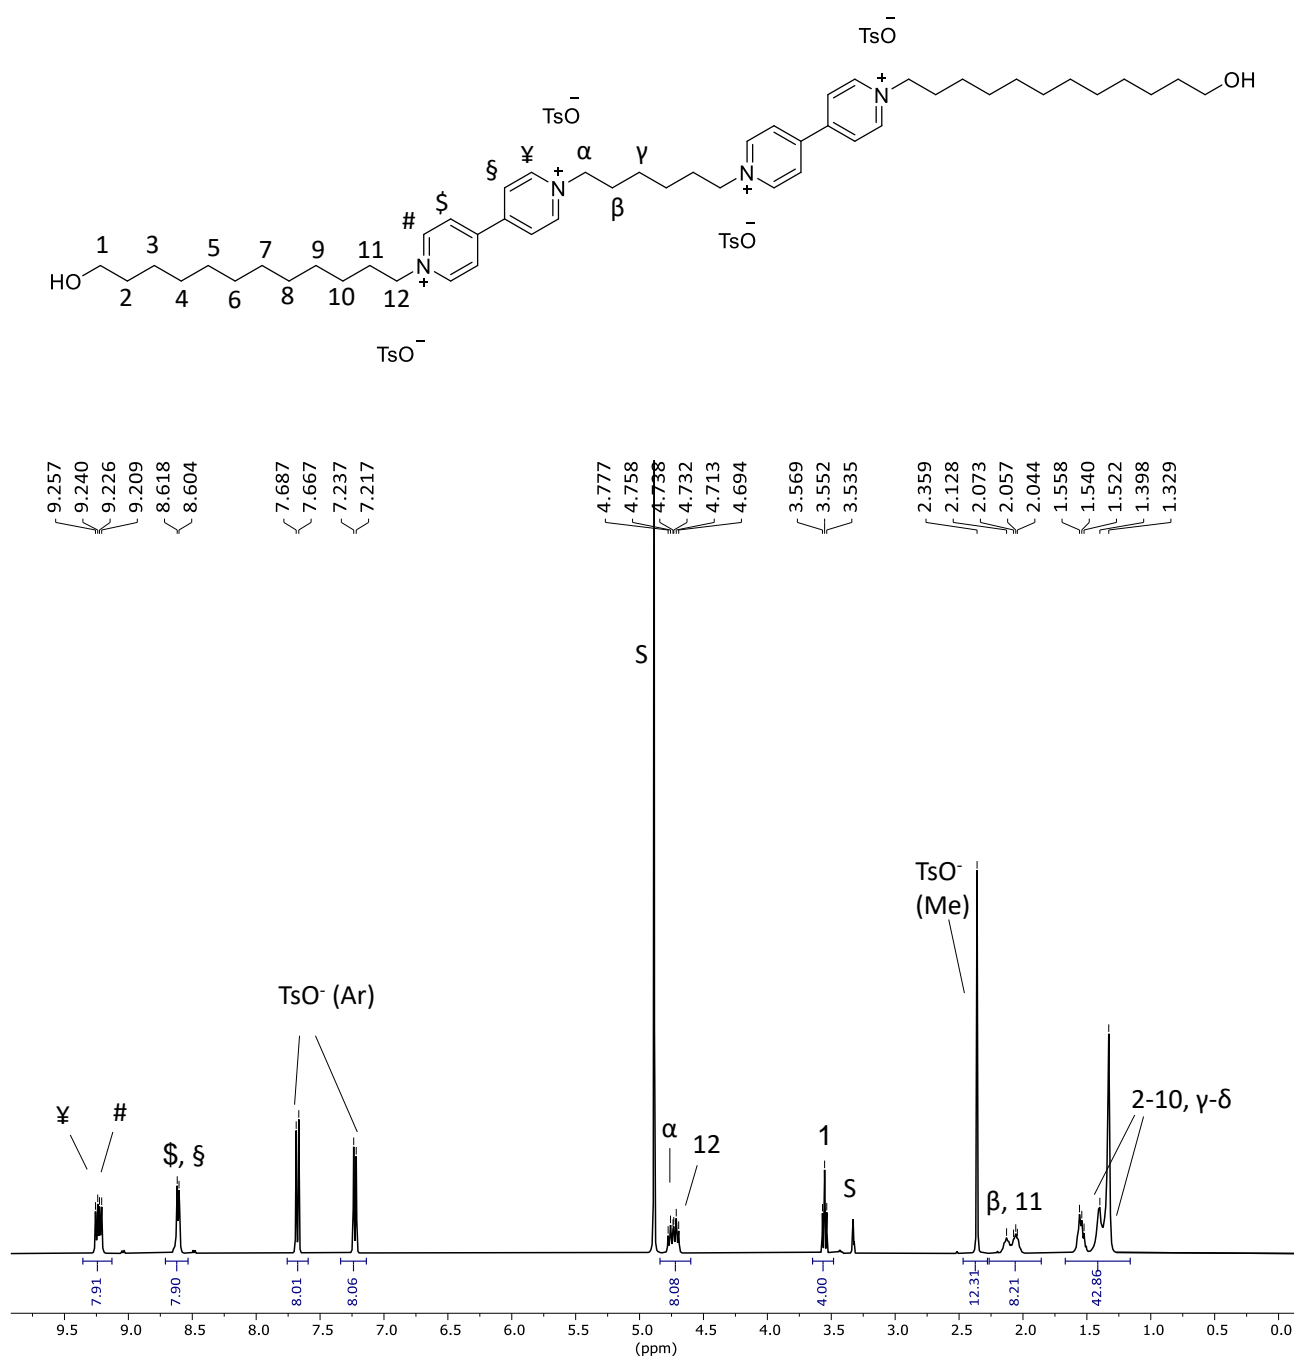

Figure S3: <sup>1</sup>H NMR spectrum (400 MHz, CD<sub>3</sub>OD) of compound 5<sub>6</sub>.

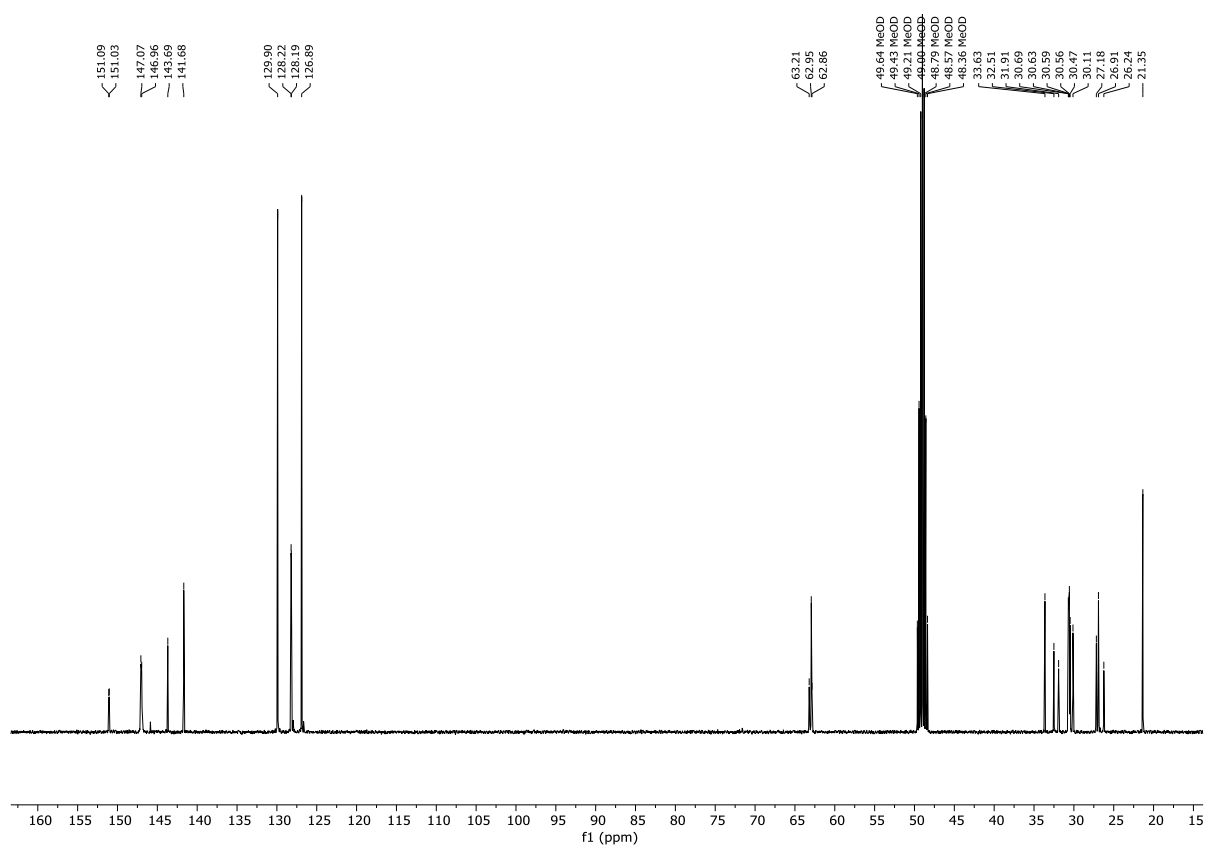

**Figure S4:**  $^{13}\text{C}$  NMR spectrum (100 MHz,  $\text{CD}_3\text{OD}$ ) of compound **5**.

## Characterisation of bis-viologen axle 5<sub>12</sub>

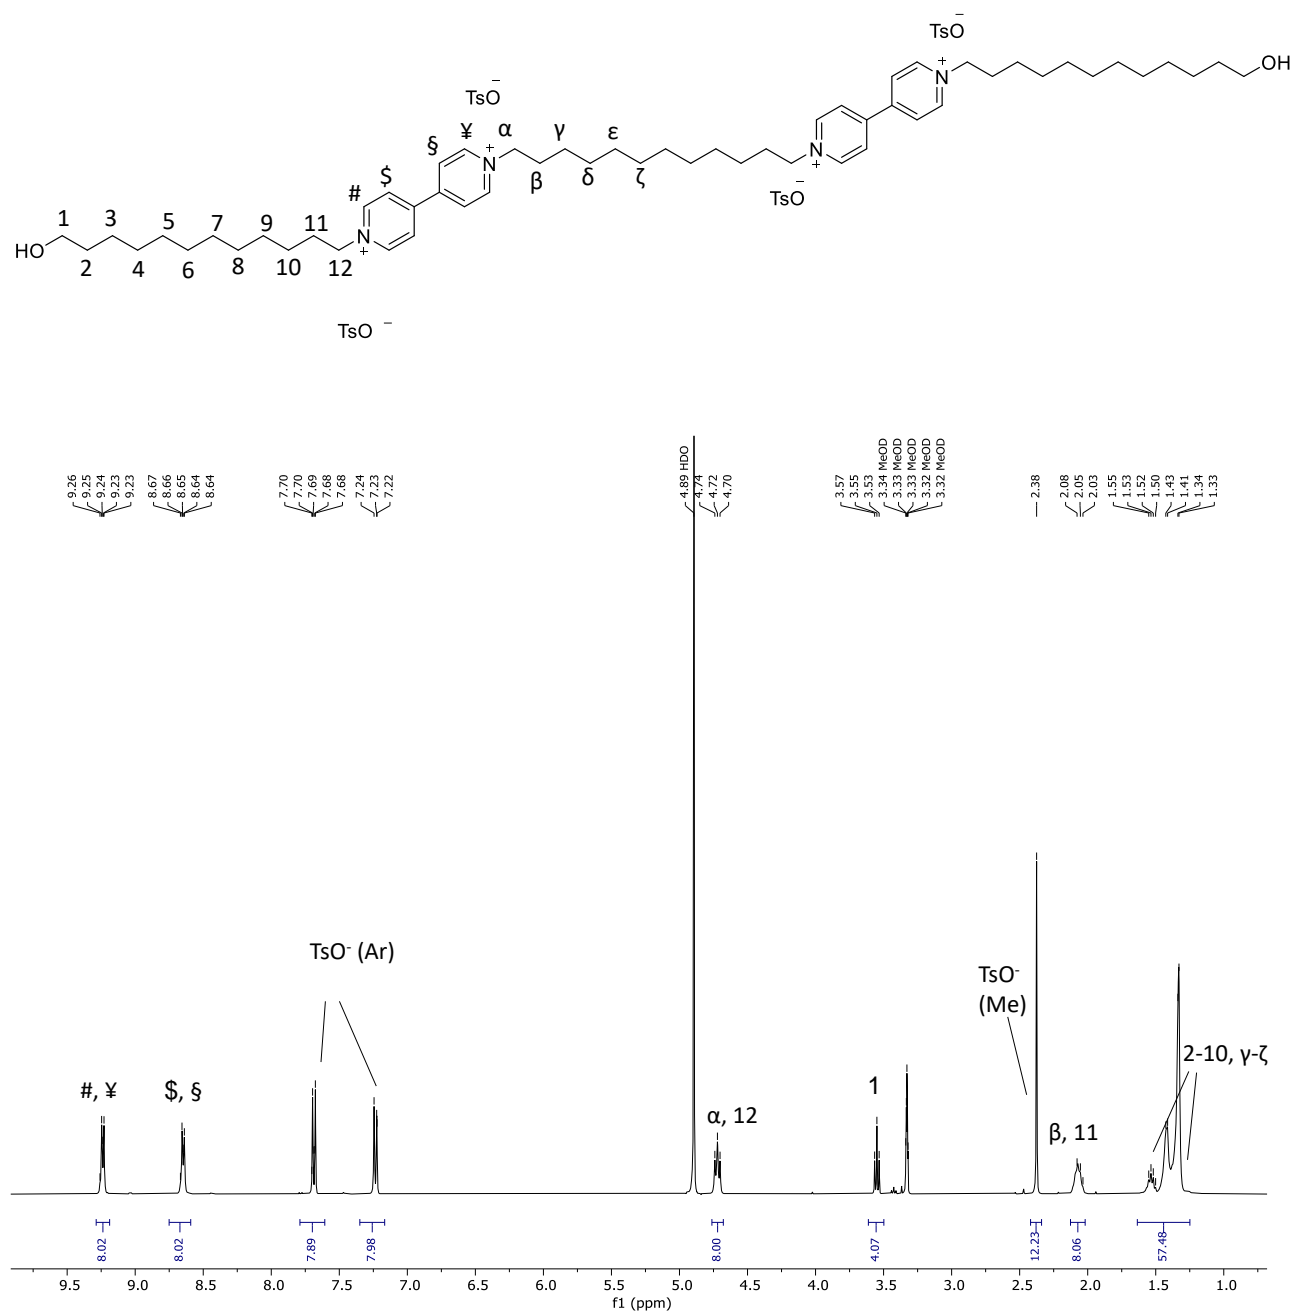

Figure S5: <sup>1</sup>H NMR spectrum (400 MHz, CD<sub>3</sub>OD) of compound 5<sub>12</sub>.

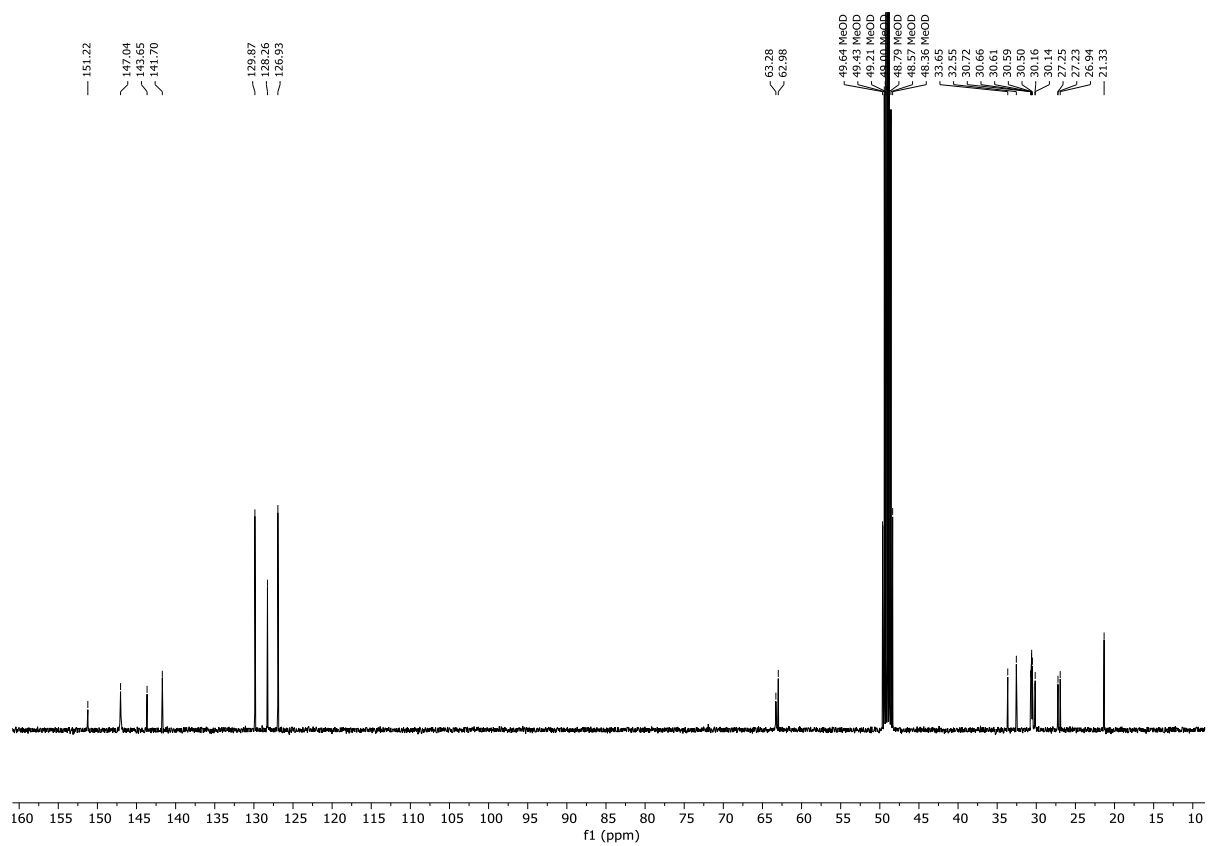

**Figure S6:**  $^{13}\text{C}$  NMR spectrum (100 MHz,  $\text{CD}_3\text{OD}$ ) of compound **512**.



## Characterisation of 11

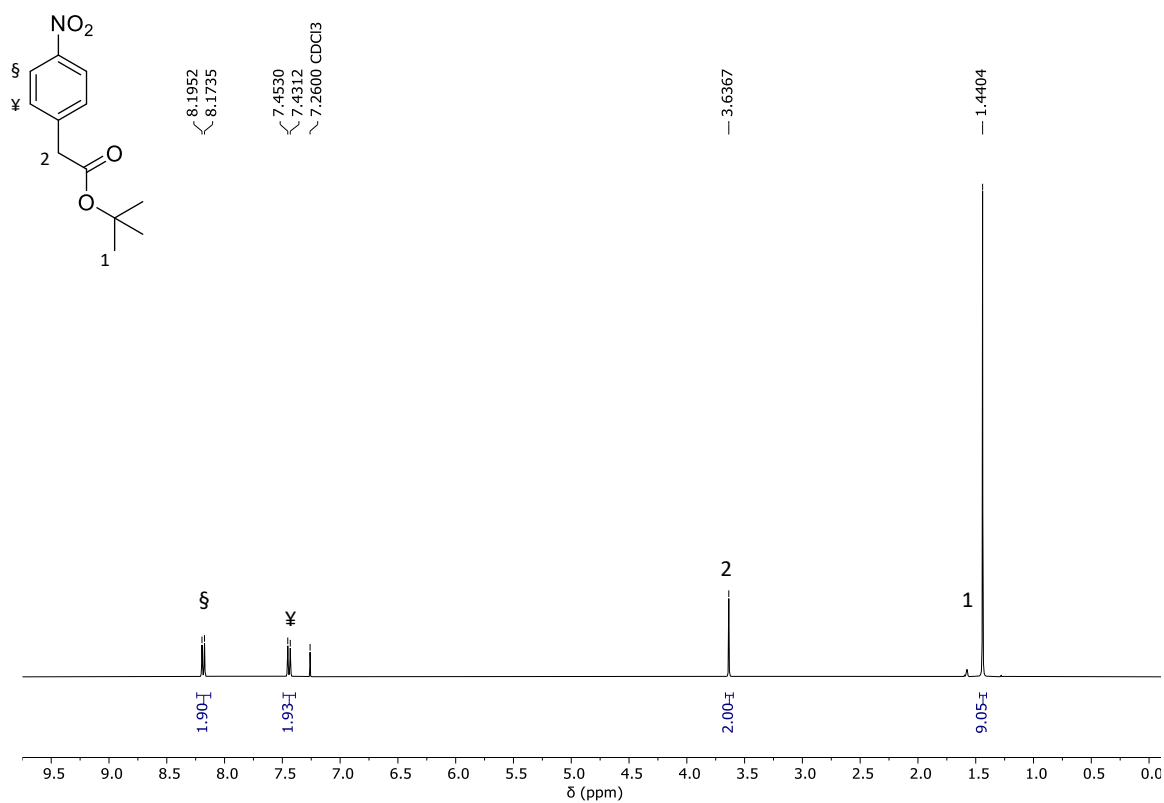

Figure S7: <sup>1</sup>H NMR spectrum (400 MHz, CDCl<sub>3</sub>) of compound 11.

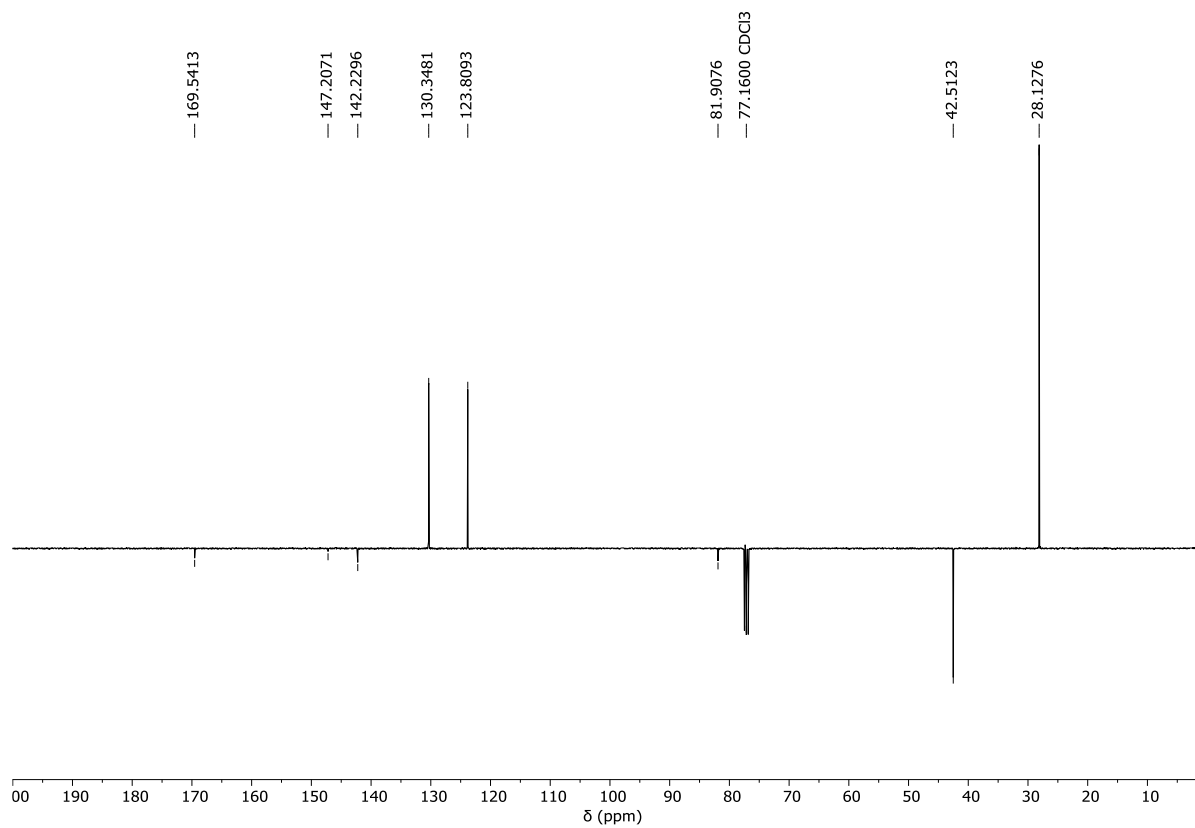

Figure S8: <sup>13</sup>C-APT NMR spectrum (100 MHz, CDCl<sub>3</sub>) of compound 11.

## Characterisation of 13

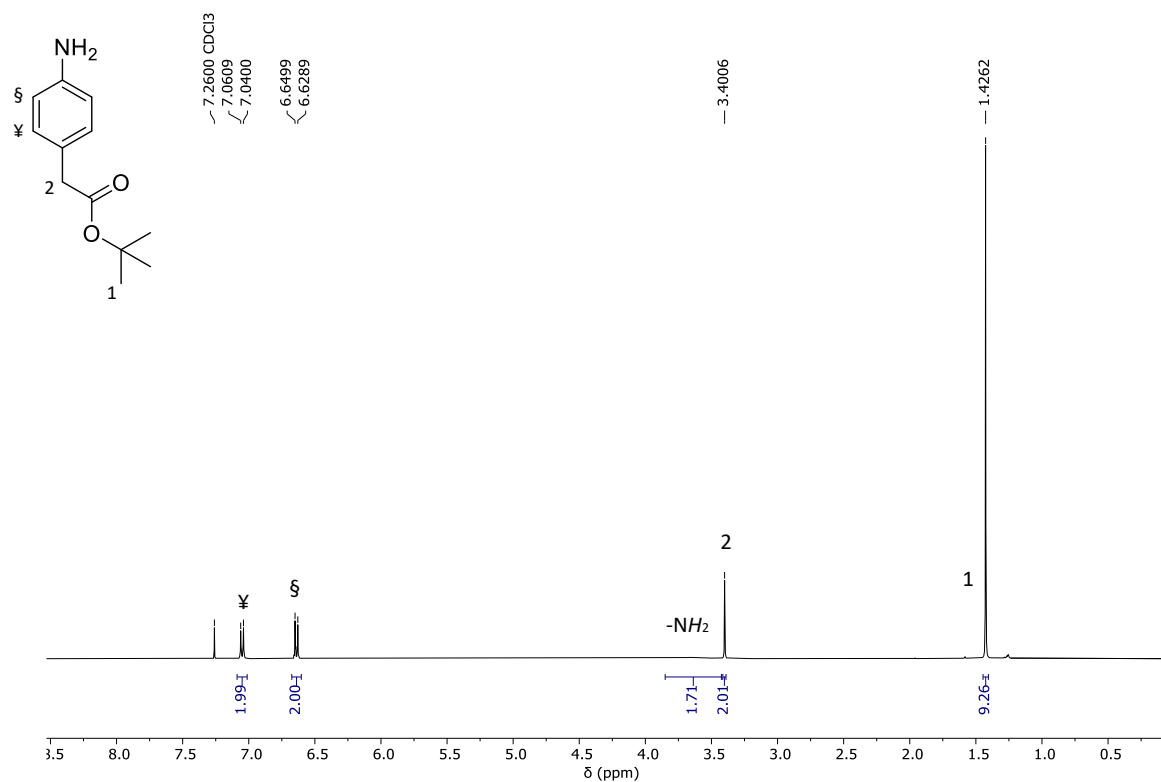

Figure S9: <sup>1</sup>H NMR spectrum (400 MHz, CDCl<sub>3</sub>) of compound 13.

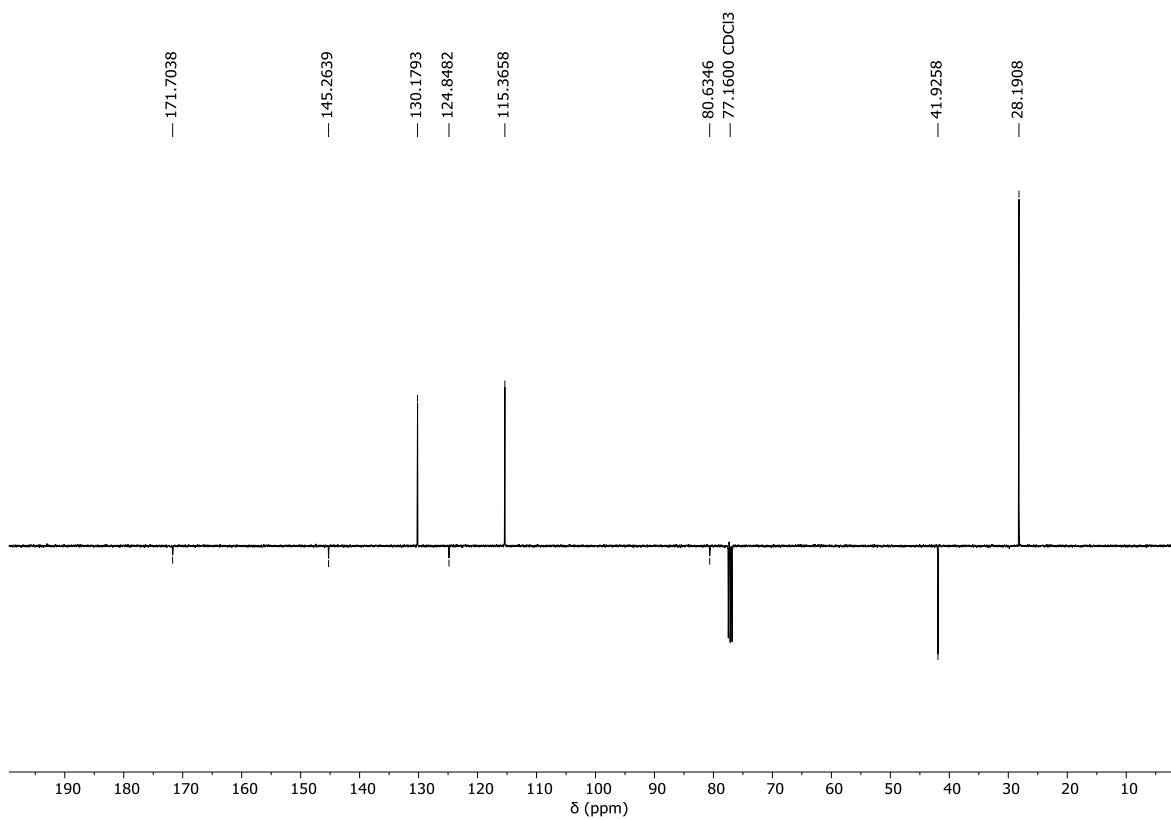

Figure S10: <sup>13</sup>C-APT NMR spectrum (100 MHz, CDCl<sub>3</sub>) of compound 13.

## Characterisation of TPU-ES

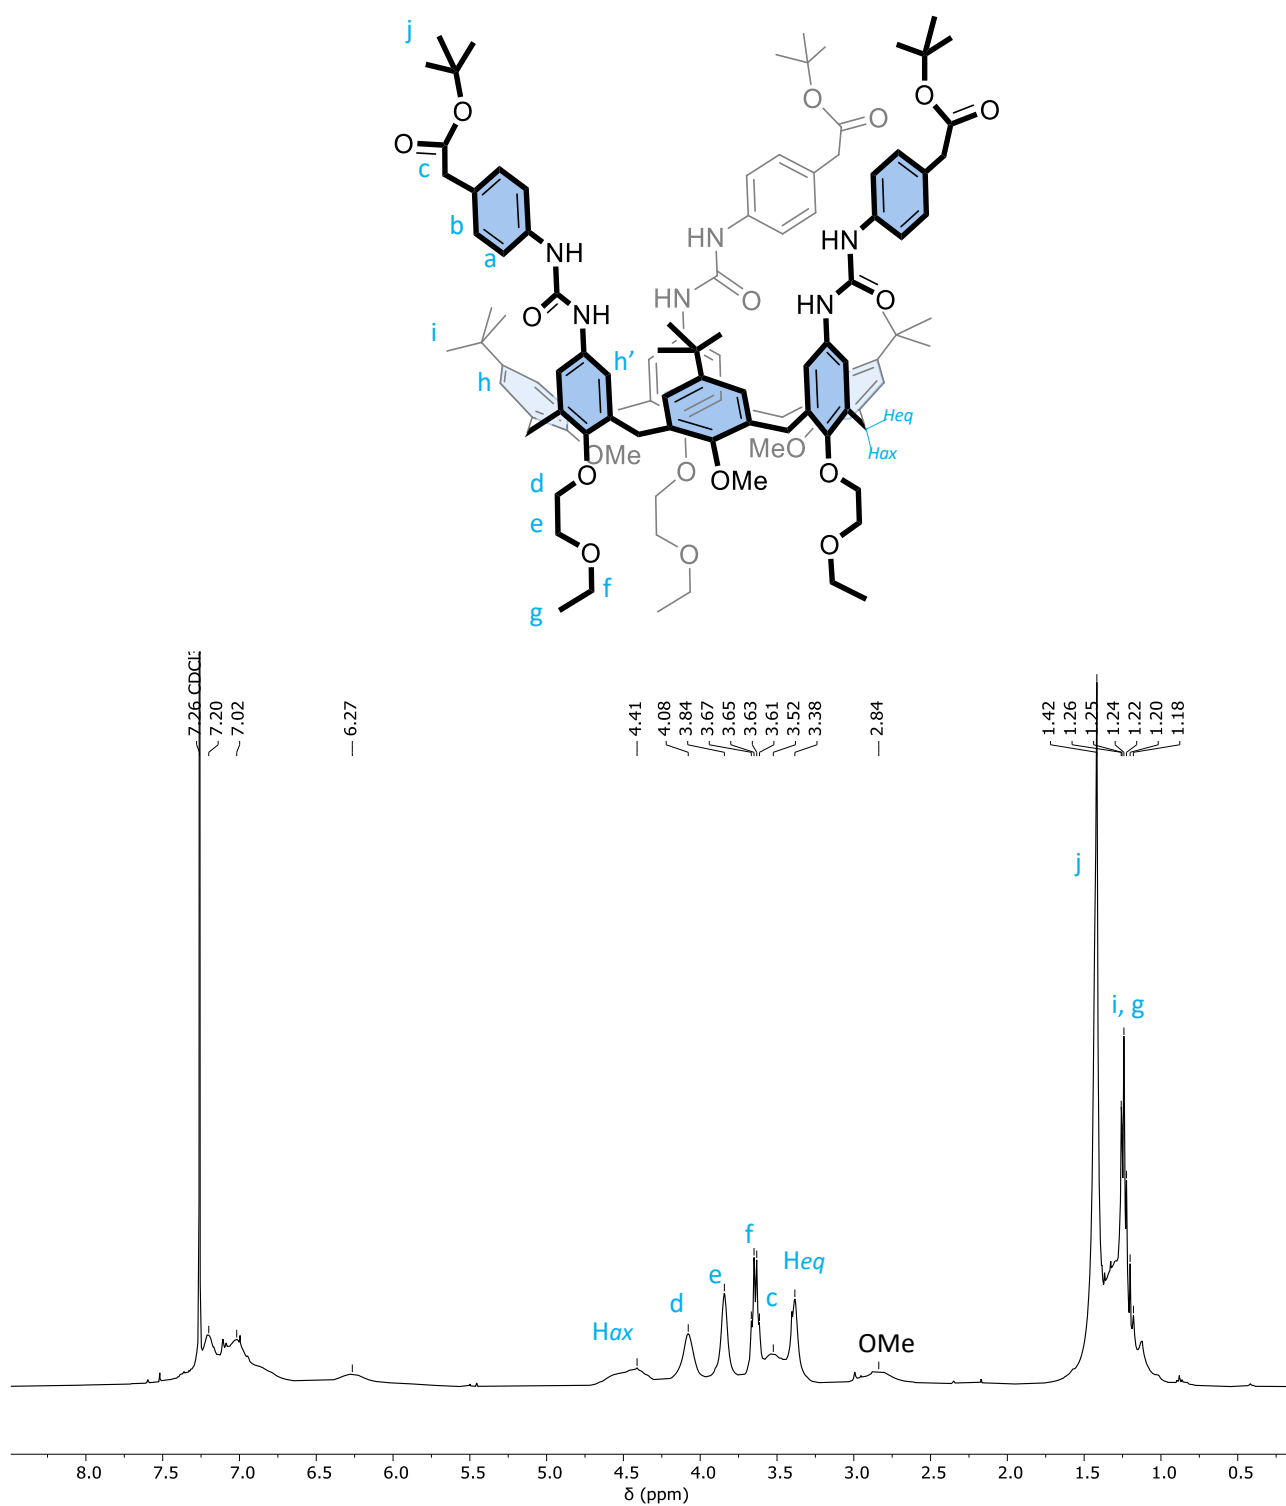

**Figure S11**  $^1\text{H}$  NMR spectrum (400 MHz,  $\text{CDCl}_3$ ) of compound TPU-ES.

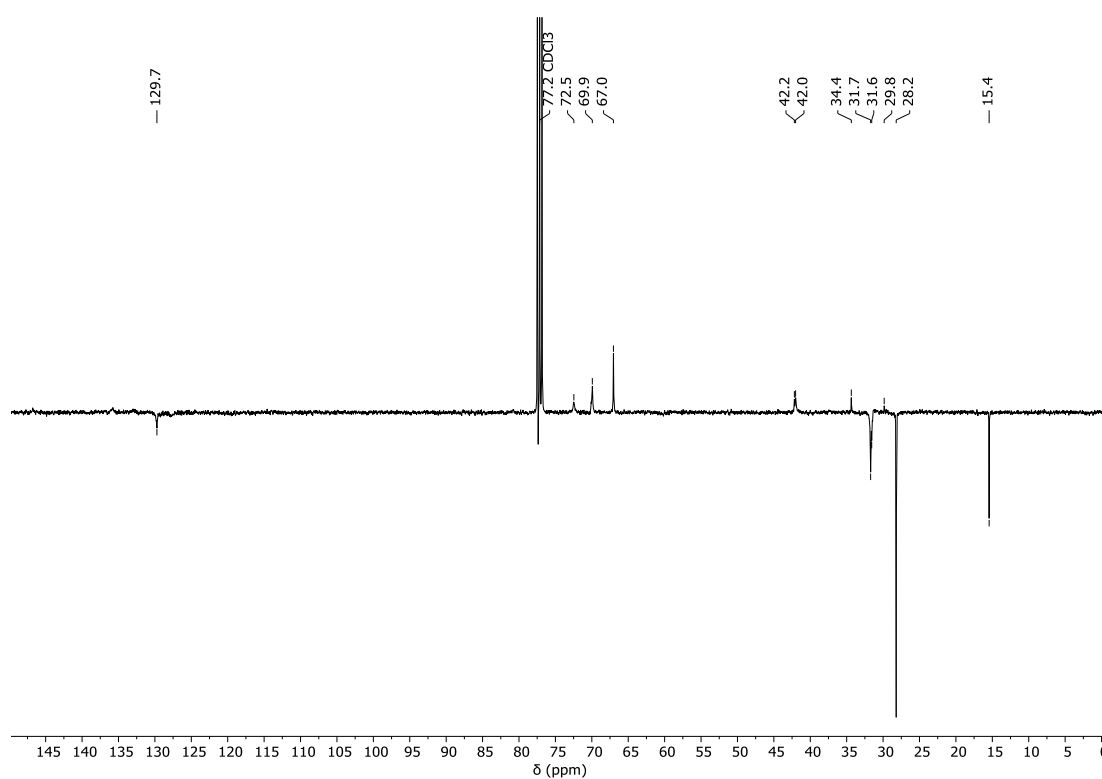

**Figure S12:**  $^{13}\text{C}$ -APT NMR spectrum (100 MHz,  $\text{CDCl}_3$ ) of compound **TPU-ES**.

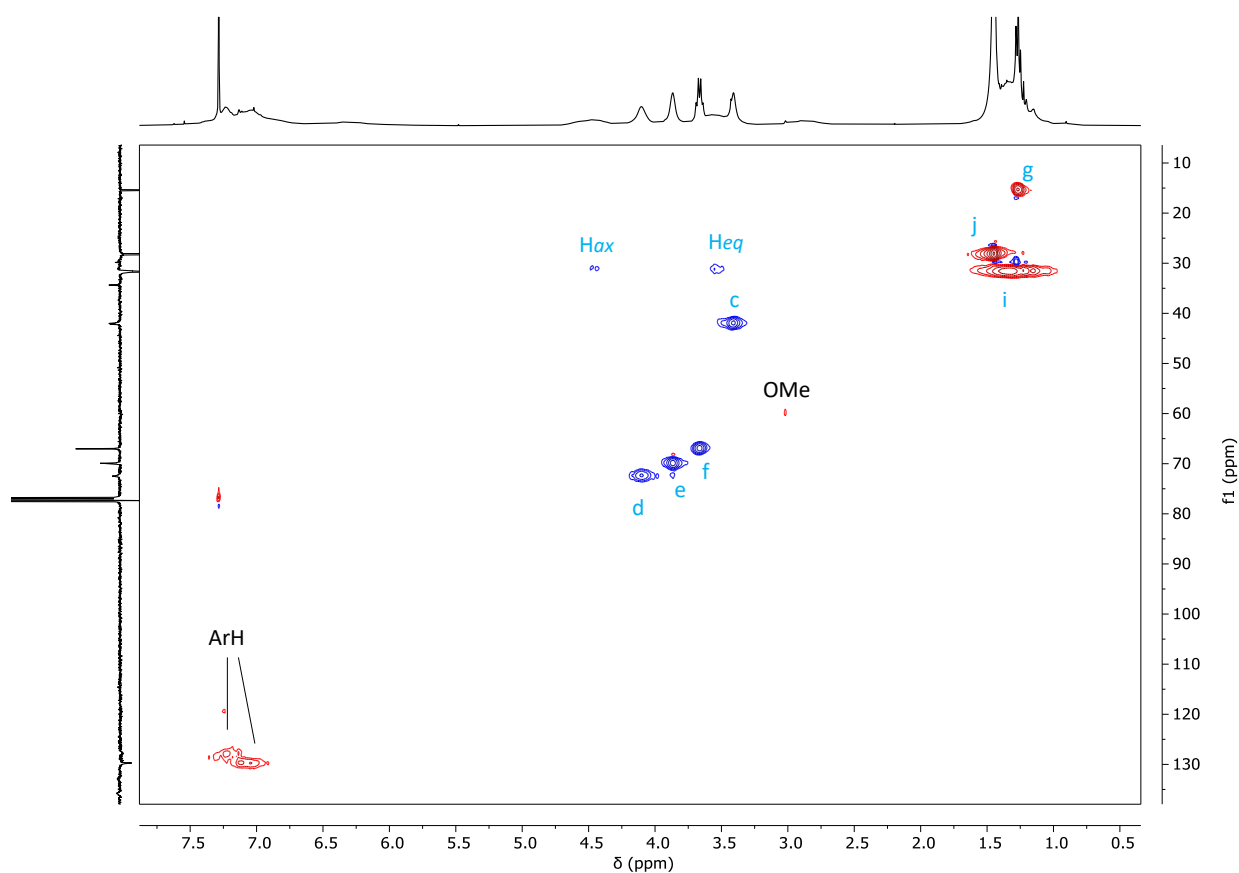

**Figure S13:** Edited HSQC 2D NMR spectrum (400 MHz,  $\text{CDCl}_3$ ) of compound **TPU-ES**. Positive peaks ( $\text{CH}_3$  and  $\text{CH}$ ) are shown in red, while negative ones ( $\text{CH}_2$ ) are in blue.

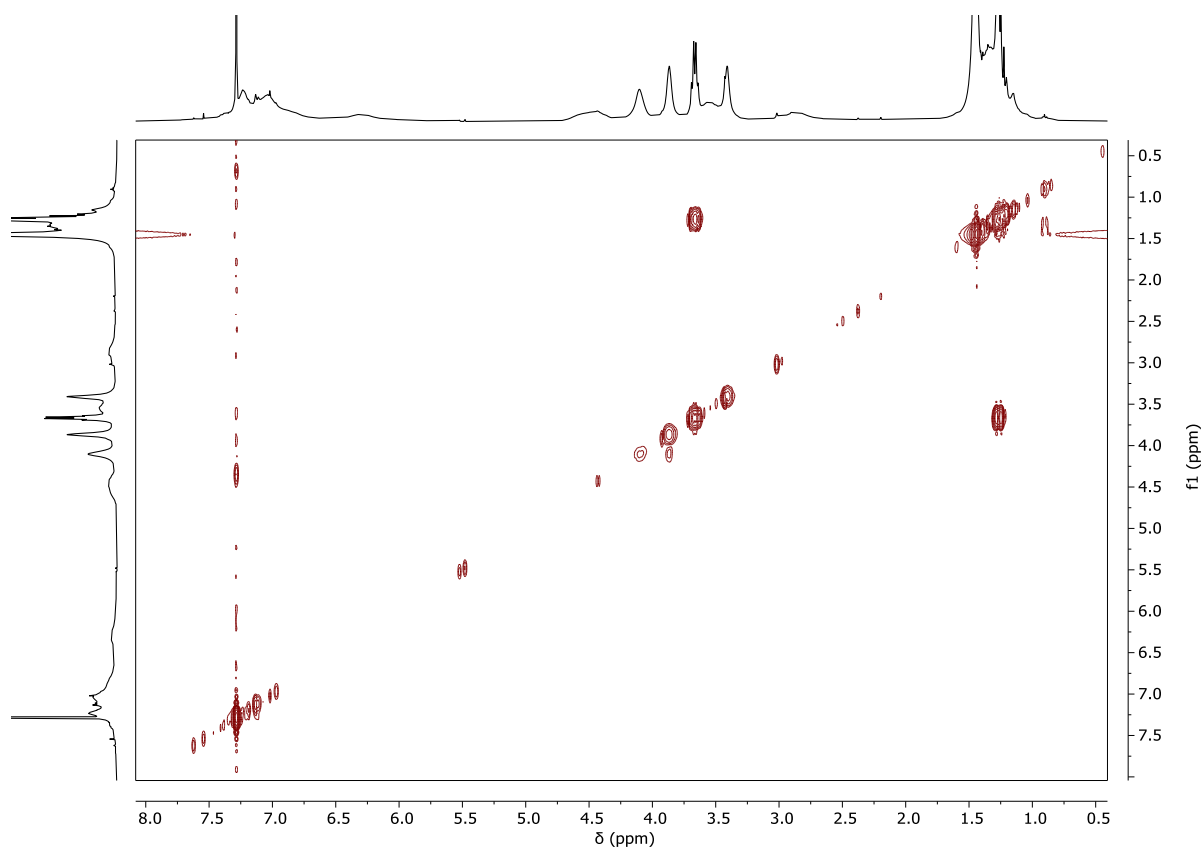

**Figure S14:** 2D magnitude g-COSY NMR spectrum (400 MHz, CDCl<sub>3</sub>) of compound TPU-ES.

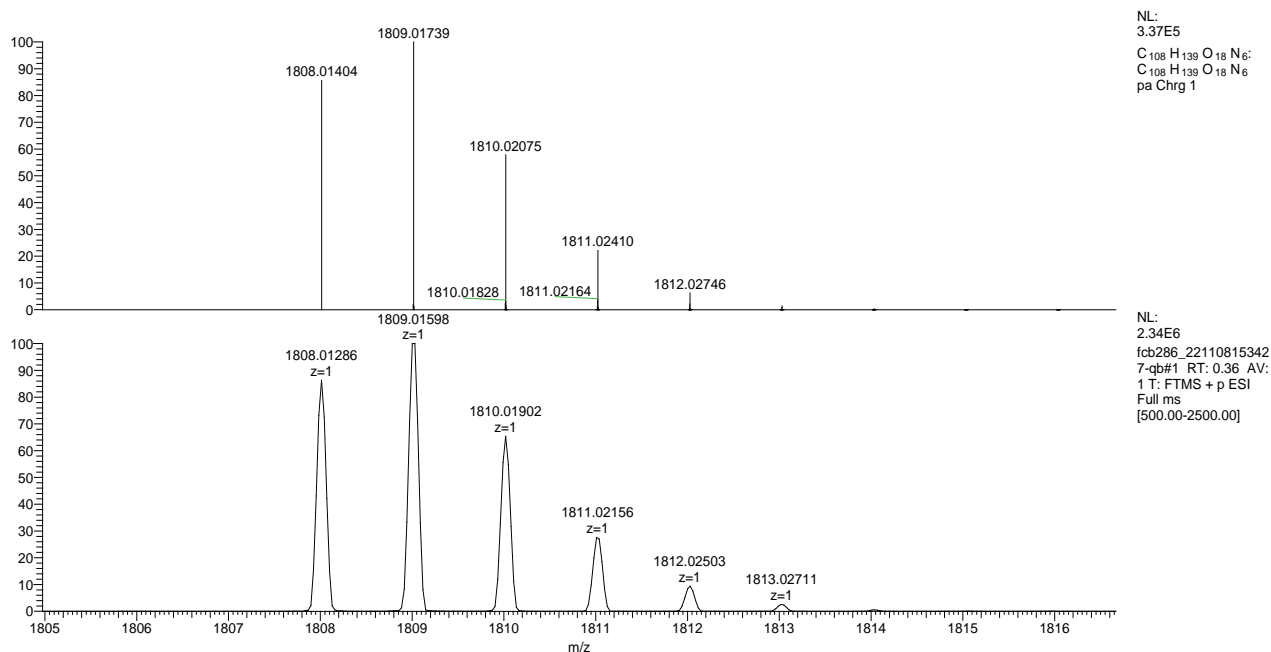

**Figure S15:** Inset of HR-MS (ESI, Orbitrap LQ) spectrum of compound **TPU-ES**: calculated (top) and experimental (down) isotopic distribution for the singly charged molecular ion.

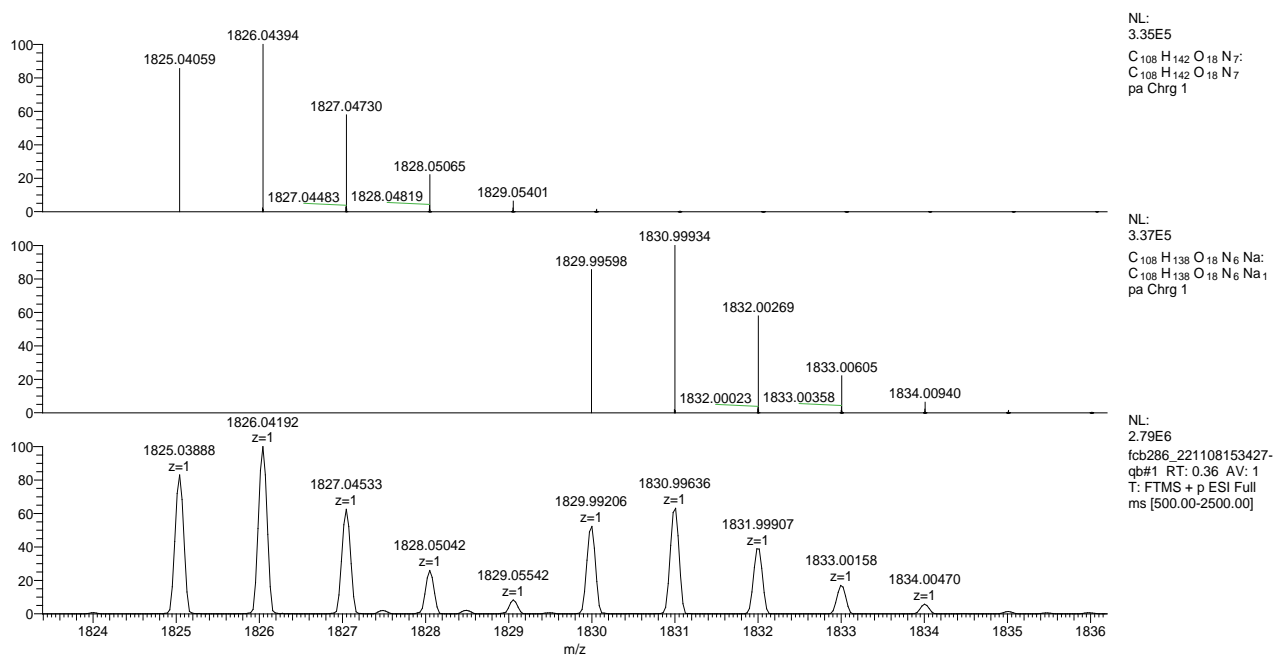

**Figure S16:** Inset of HR-MS (ESI, Orbitrap LQ) spectrum of compound **TPU-ES**: calculated (top) and experimental (down) isotopic distributions for singly charged molecular adducts with ammonium and sodium ions, respectively.

## Characterisation of TPU-OTBS

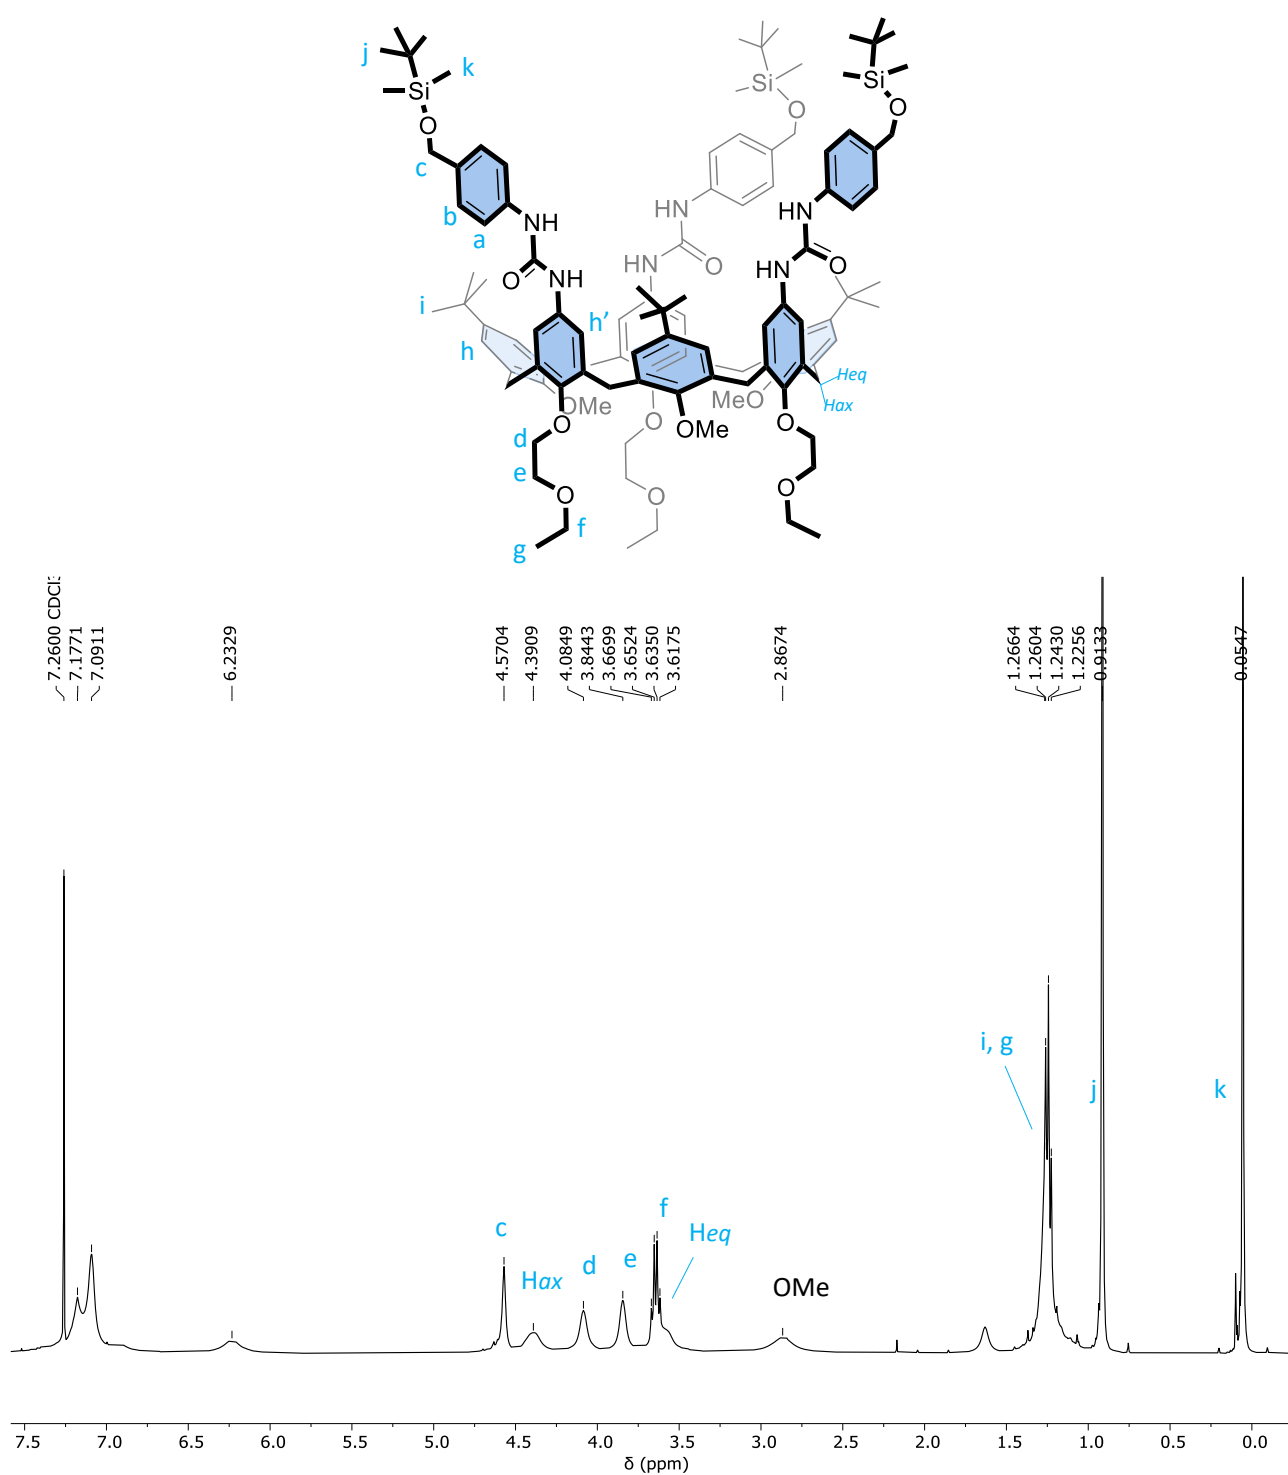

**Figure S17:** <sup>1</sup>H NMR spectrum (400 MHz, CDCl<sub>3</sub>) of compound TPU-OTBS.

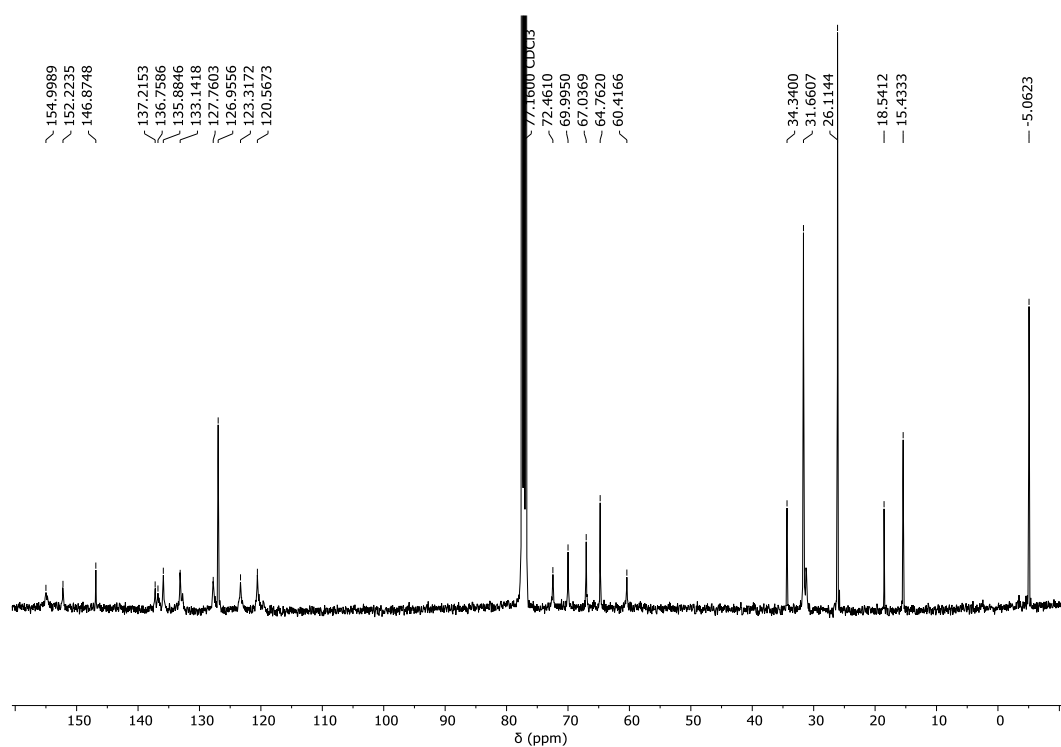

**Figure S18:**  $^{13}\text{C}$  NMR spectrum (100 MHz,  $\text{CDCl}_3$ ) of compound **TPU-OTBS**.

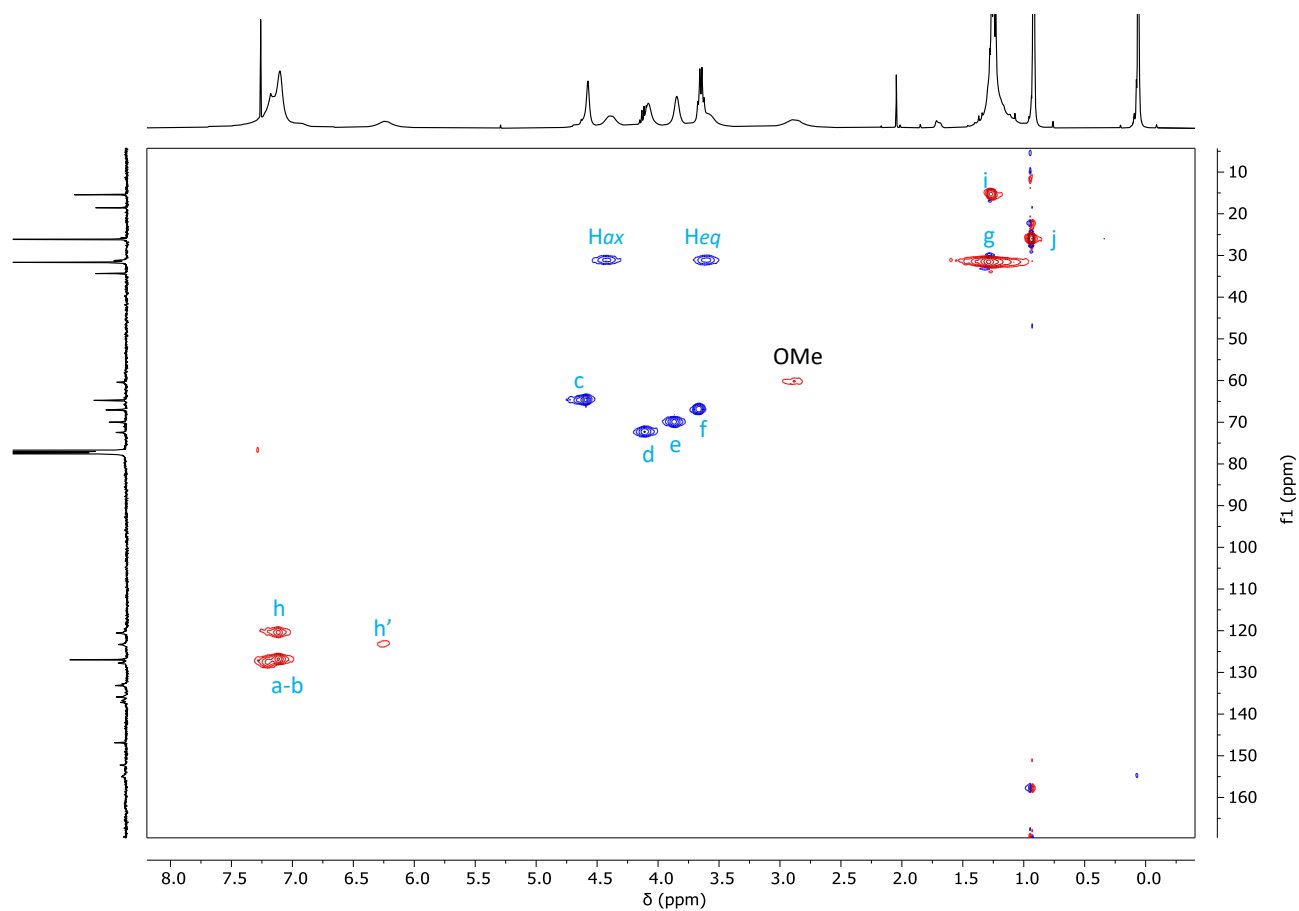

**Figure S19:** Edited HSQC 2D NMR spectrum (400 MHz,  $\text{CDCl}_3$ ) of compound **TPU-OTBS**. Positive peaks ( $\text{CH}_3$  and  $\text{CH}$ ) are shown in red, while negative ones ( $\text{CH}_2$ ) are in blue.



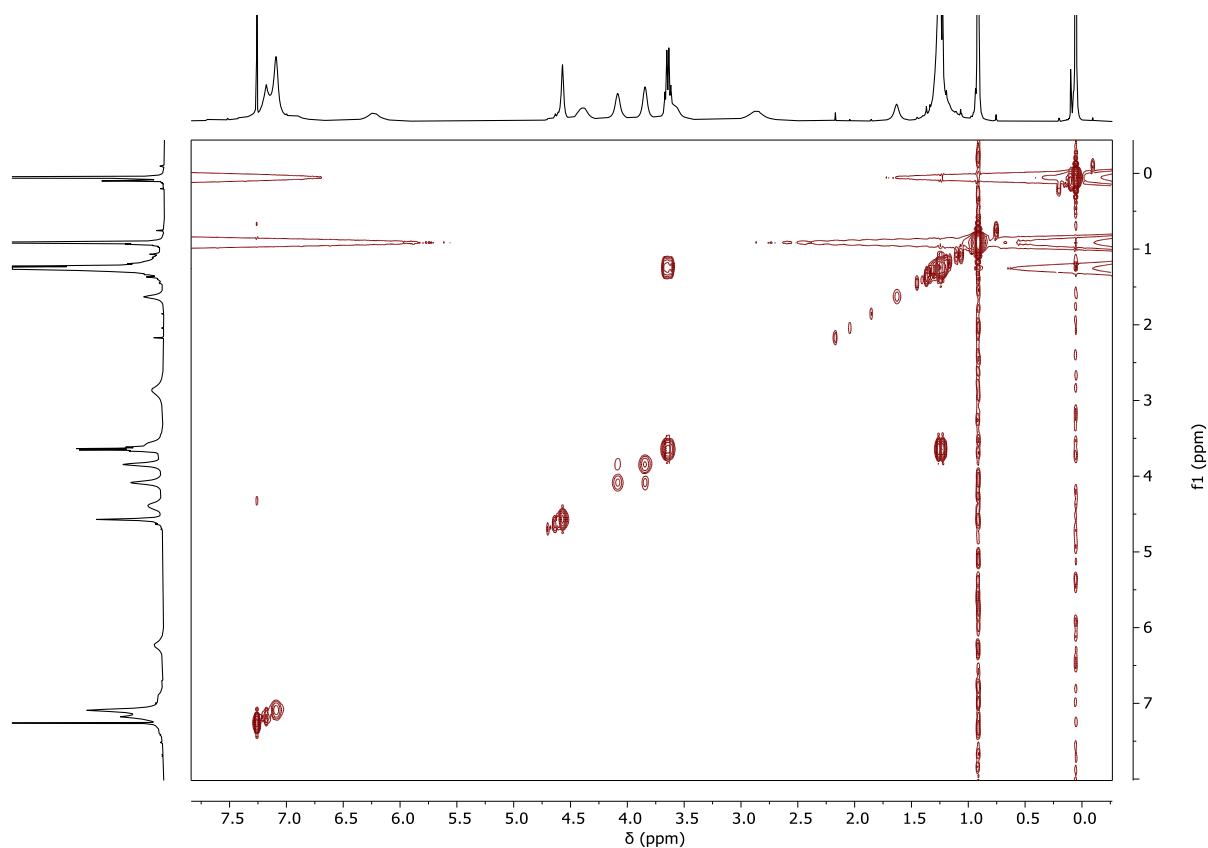

**Figure S20:** 2D magnitude g-COSY NMR spectrum (400 MHz,  $\text{CDCl}_3$ ) of compound **TPU-OTBS**.

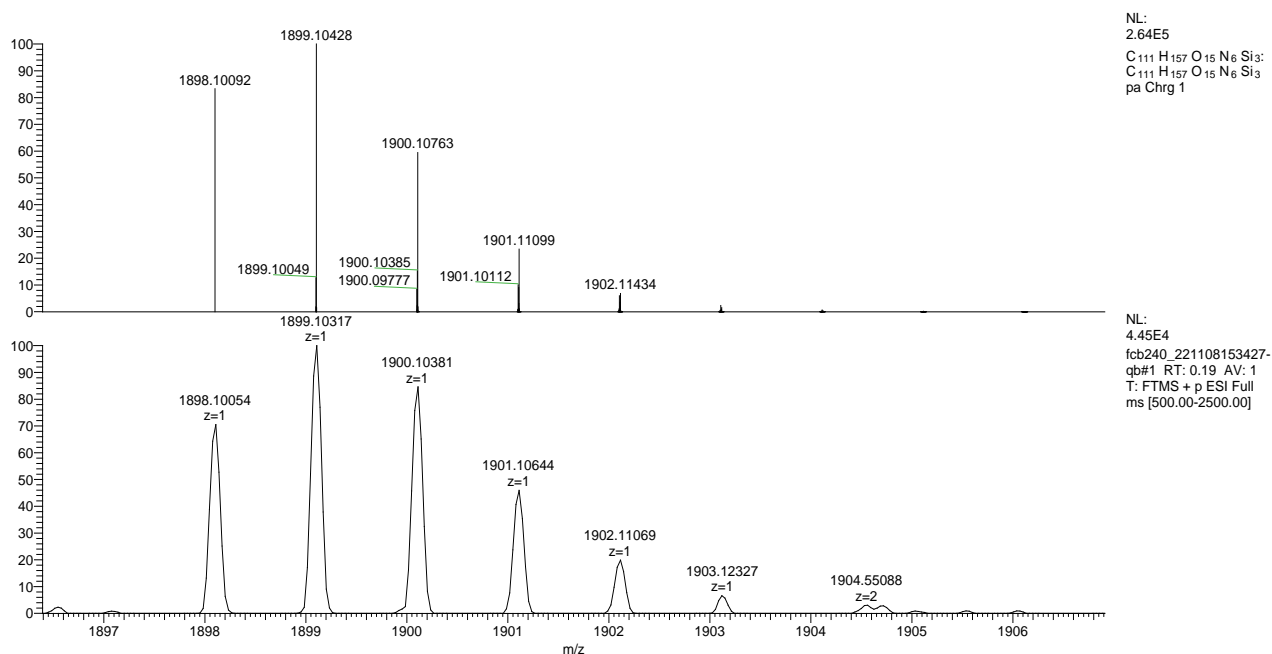

**Figure S21:** Inset of HR-MS (ESI, Orbitrap LQ) spectrum of compound **TPU-OTBS**: calculated (top) and experimental (down) isotopic distribution for the singly charged molecular ion.

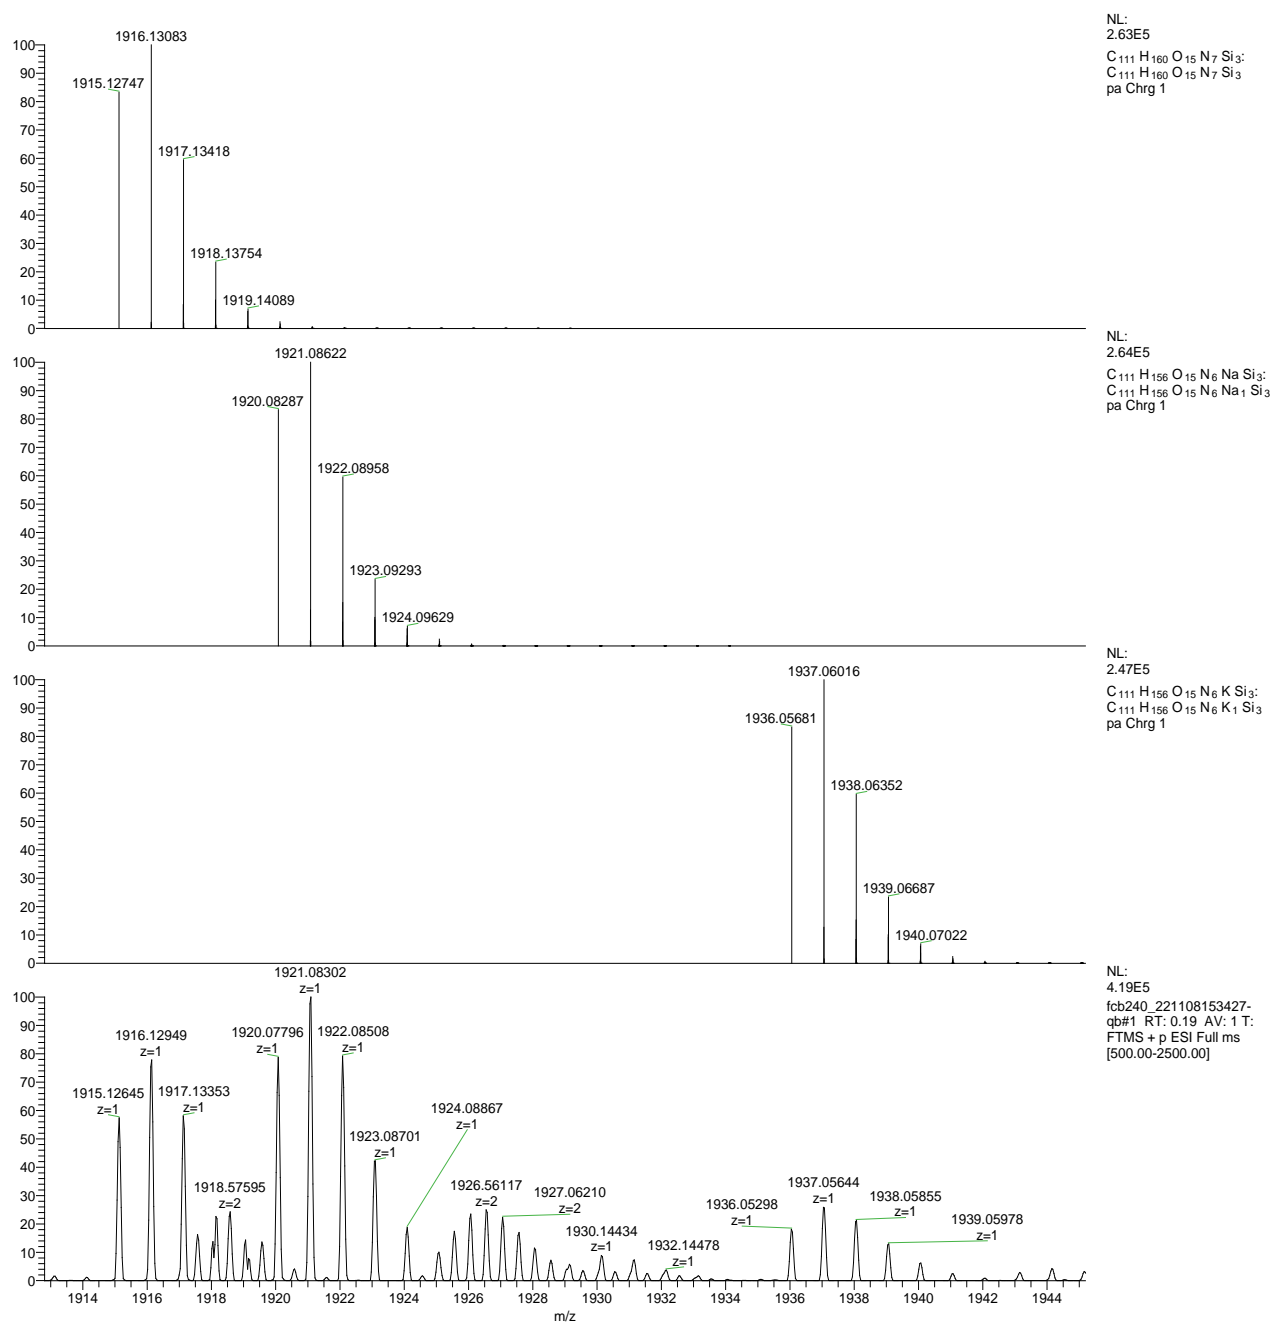

**Figure S22:** Inset of HR-MS (ESI, Orbitrap LQ) spectrum of compound **TPU-OTBS**: calculated (top) and experimental (down) isotopic distributions for singly charged molecular adducts with ammonium, sodium, and potassium ions, respectively.

# Characterisation of $P[(\text{TPU})_2\text{5}_6]$

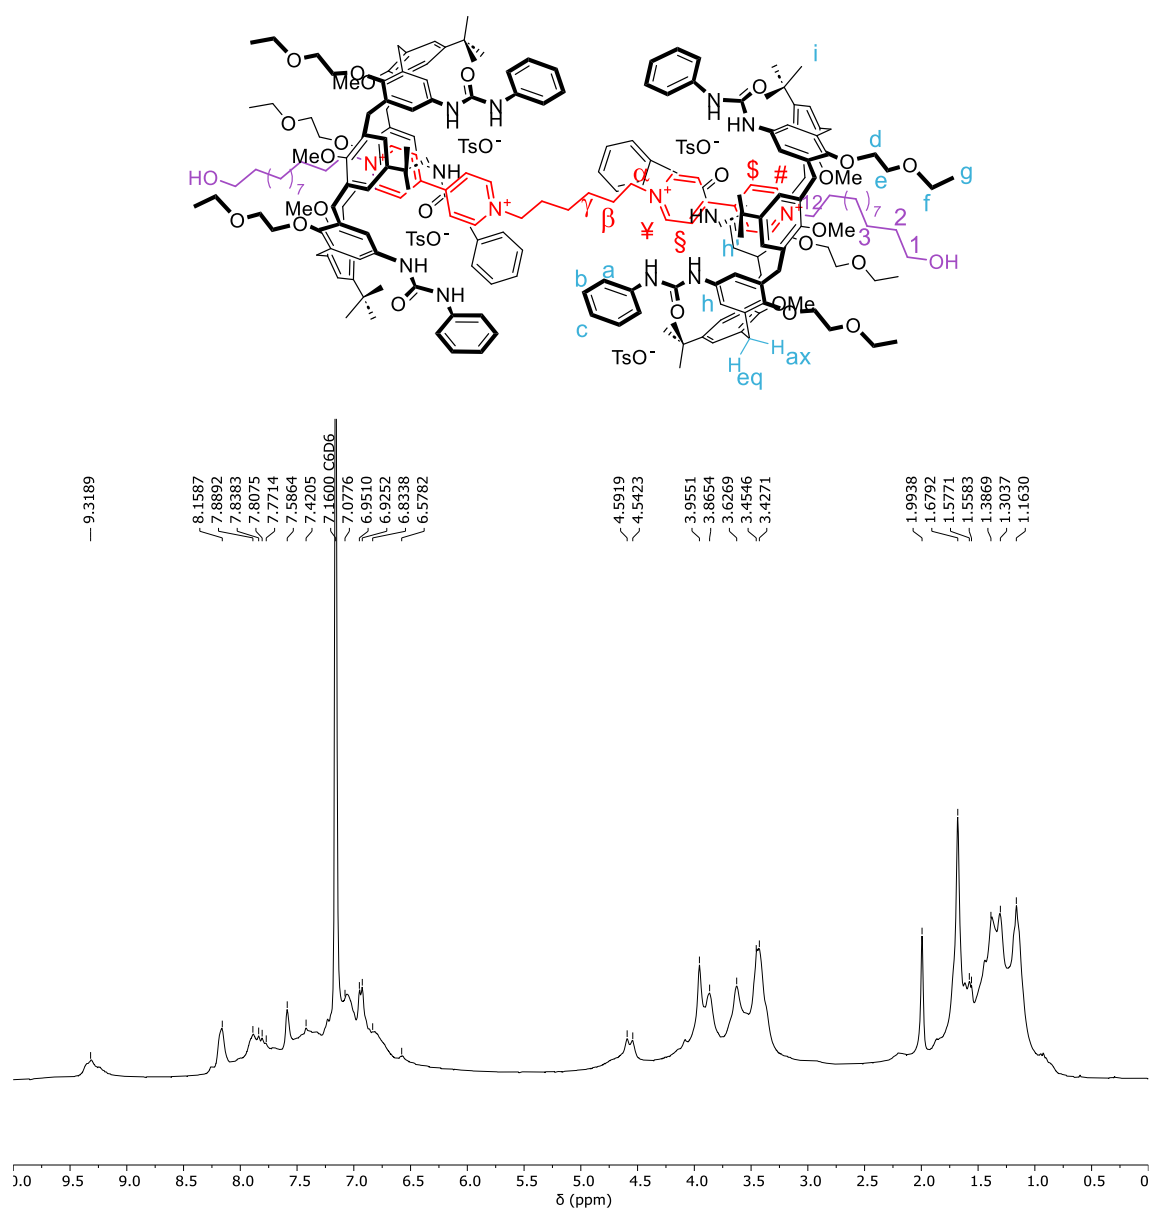

**Figure S23:**  $^1\text{H}$  NMR spectrum (400 MHz, benzene- $d_6$ ) of [3]pseudorotaxane  $P[(\text{TPU})_2\text{5}_6]$ .

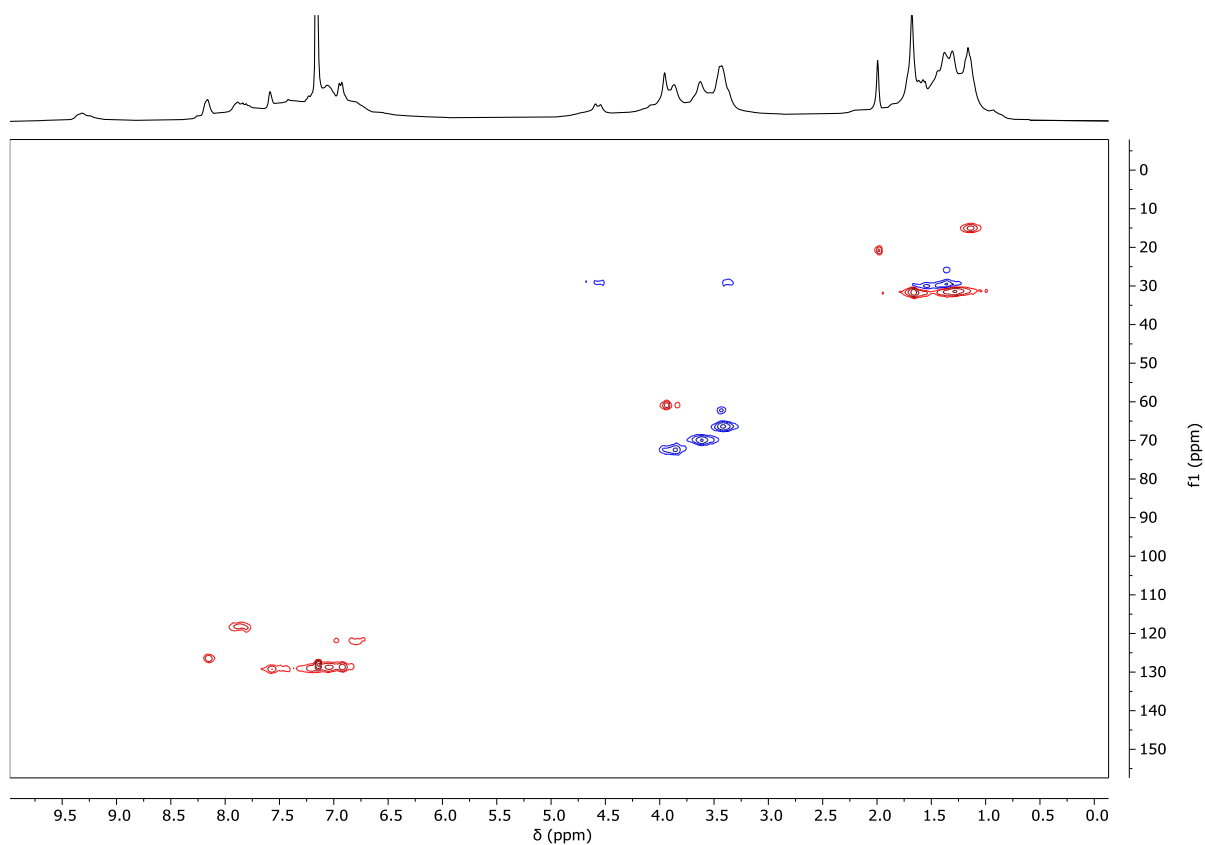

**Figure S24:** Edited HSQC 2D NMR spectrum (400 MHz, benzene- $d_6$ ) of [3]pseudorotaxane  $P[(\text{TPU})_2\supset 5]$ . Positive peaks ( $\text{CH}_3$  and  $\text{CH}$ ) are shown in red, while negative ones ( $\text{CH}_2$ ) are in blue.

# Characterisation of $P[(\text{TPU})_2\supset 5_{12}]$

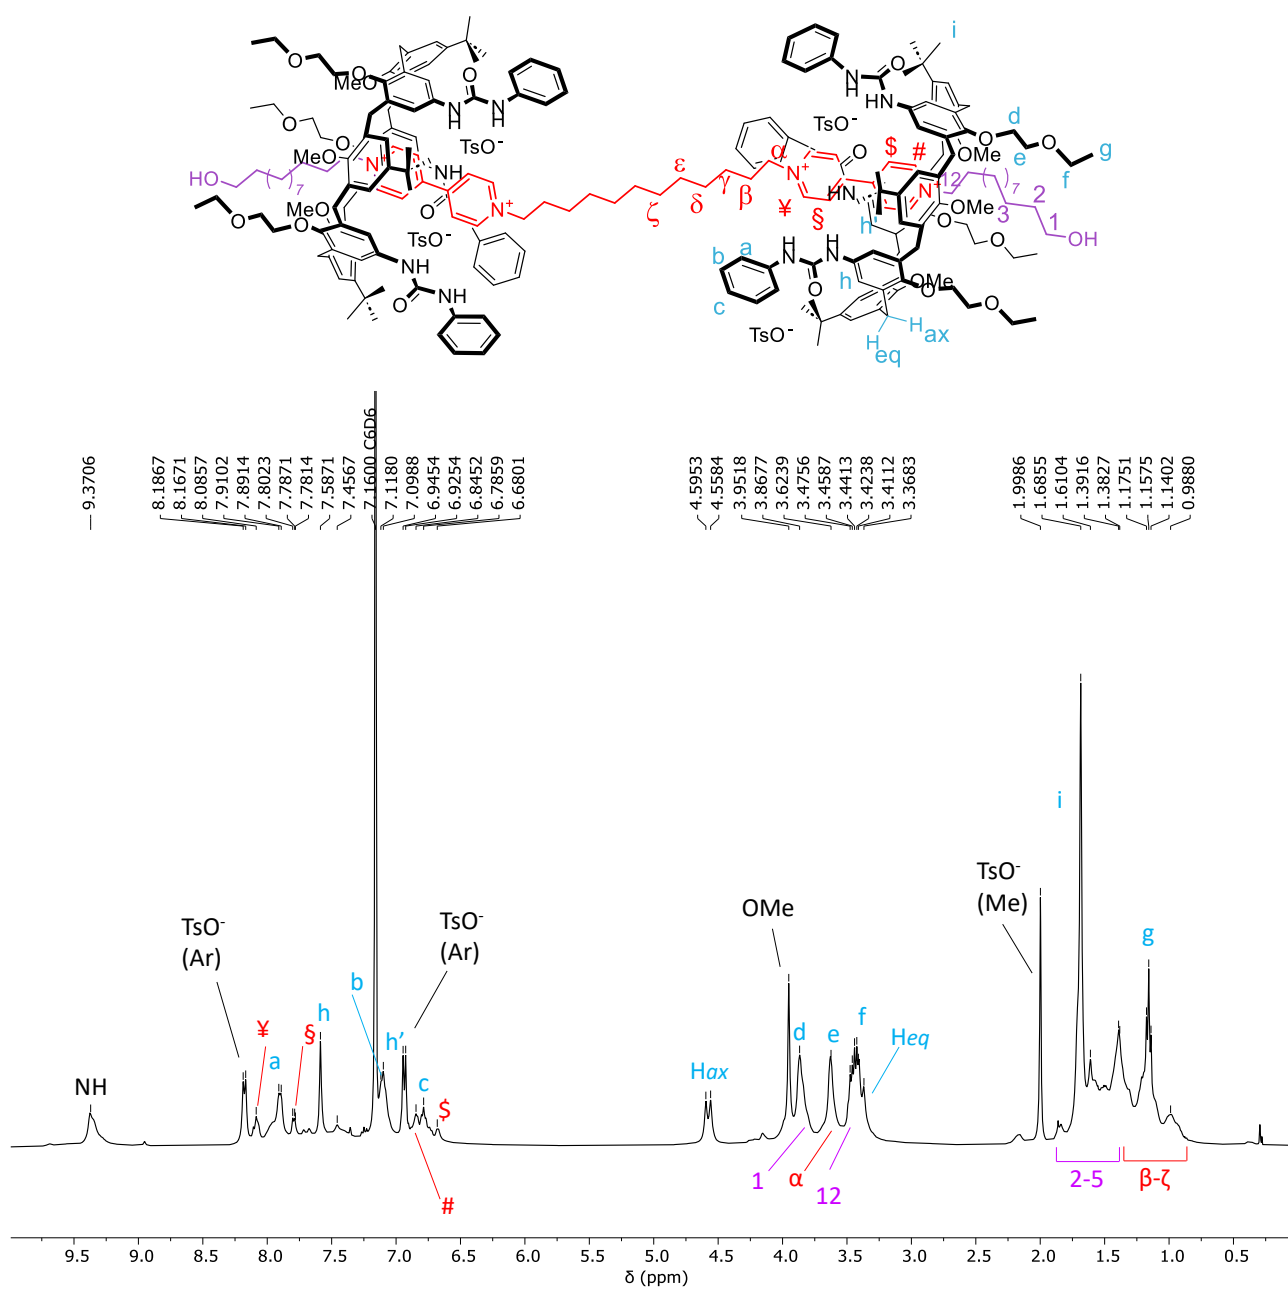

**Figure S25:**  $^1\text{H}$  NMR spectrum (400 MHz,  $\text{benzene-d}_6$ ) of [3]pseudorotaxane  $P[(\text{TPU})_2\supset 5_{12}]$ .

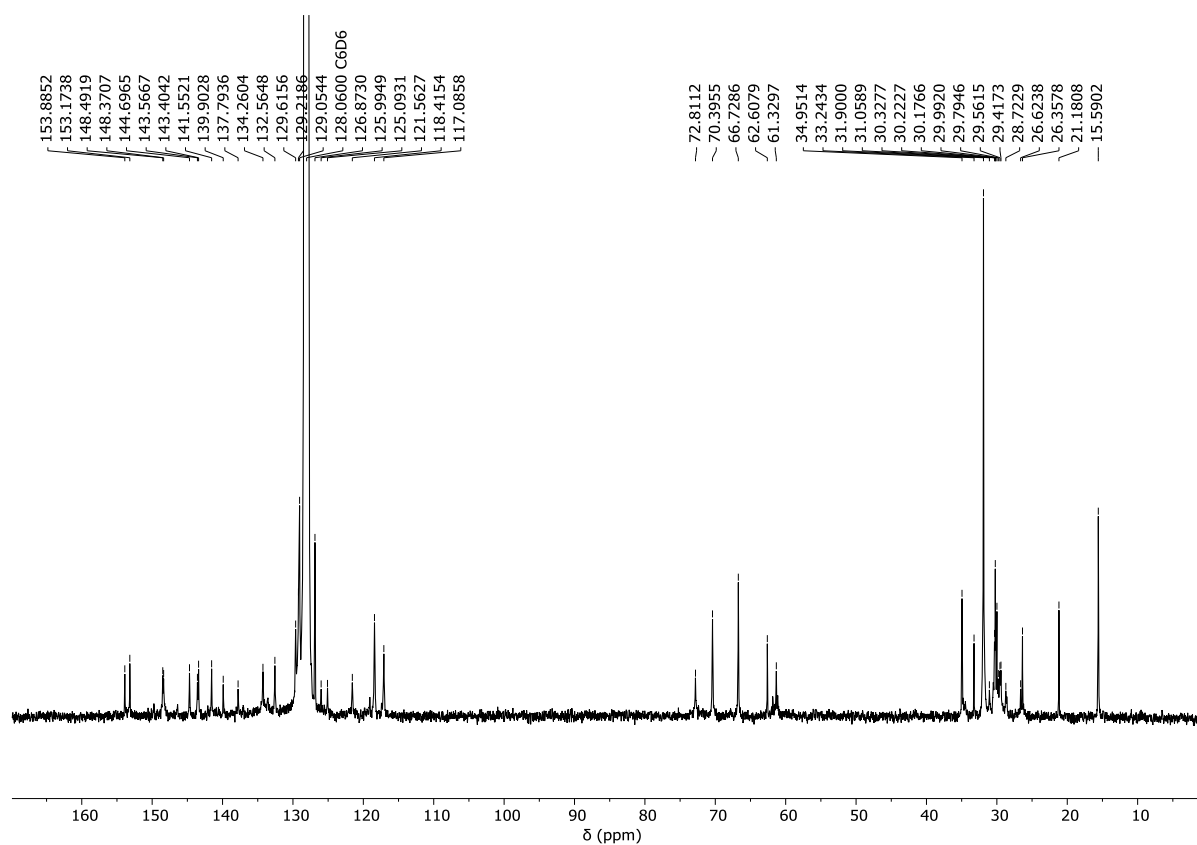

**Figure S26:**  $^{13}\text{C}$  NMR spectrum (100 MHz, benzene- $d_6$ ) of [3]pseudorotaxane  $P[(\text{TPU})_2\supset 5_{12}]$ .

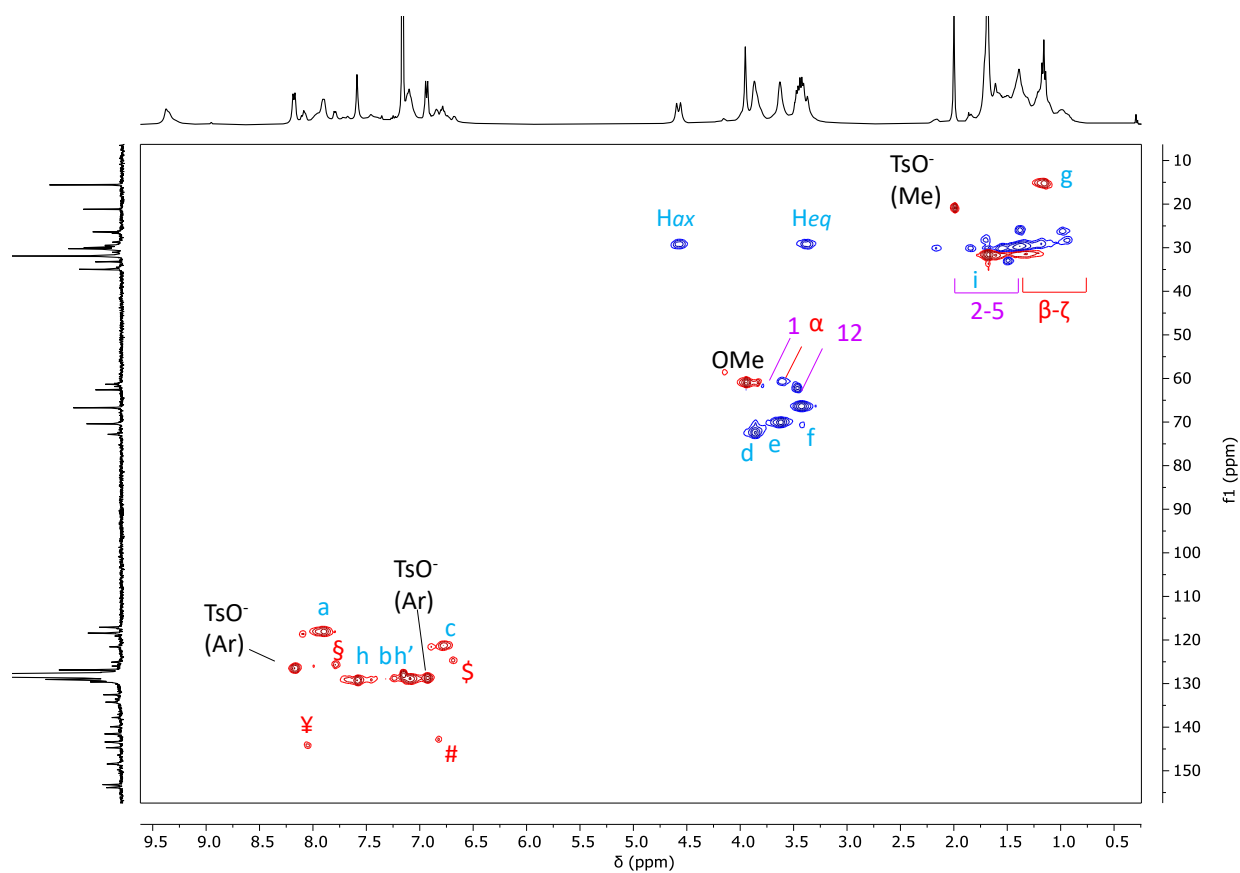

**Figure S27:** Edited HSQC NMR spectrum (400 MHz, benzene- $d_6$ ) of [3]pseudorotaxane  $P[(\text{TPU})_2\supset 5_{12}]$ . Positive peaks ( $\text{CH}_3$  and  $\text{CH}$ ) are shown in red, while negative ones ( $\text{CH}_2$ ) are in blue.

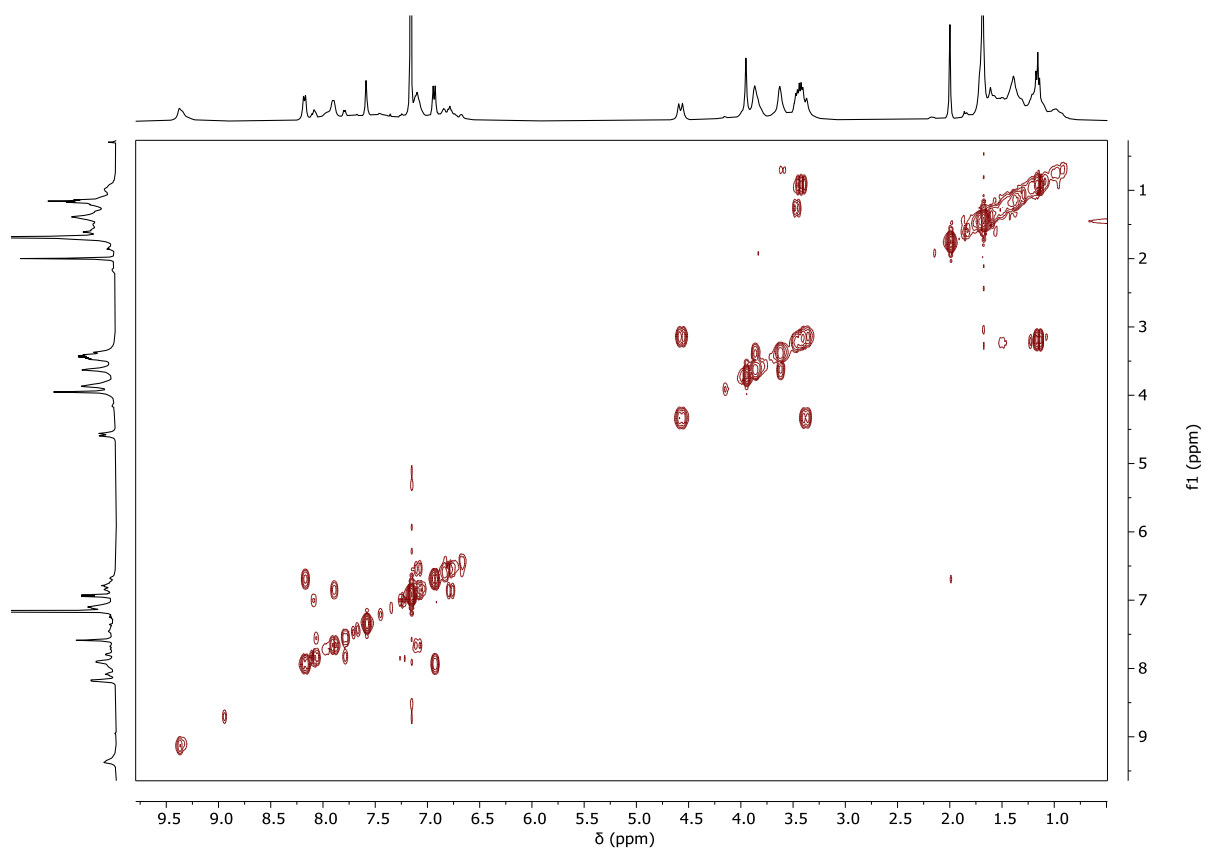

**Figure S28:** 2D magnitude g-COSY NMR spectrum (400 MHz, benzene- $d_6$ ) of [3]pseudorotaxane  $P[(\text{TPU})_2>512]$ .

# Characterisation of $R[(\text{TPU})_2\supset 6_{12}]$

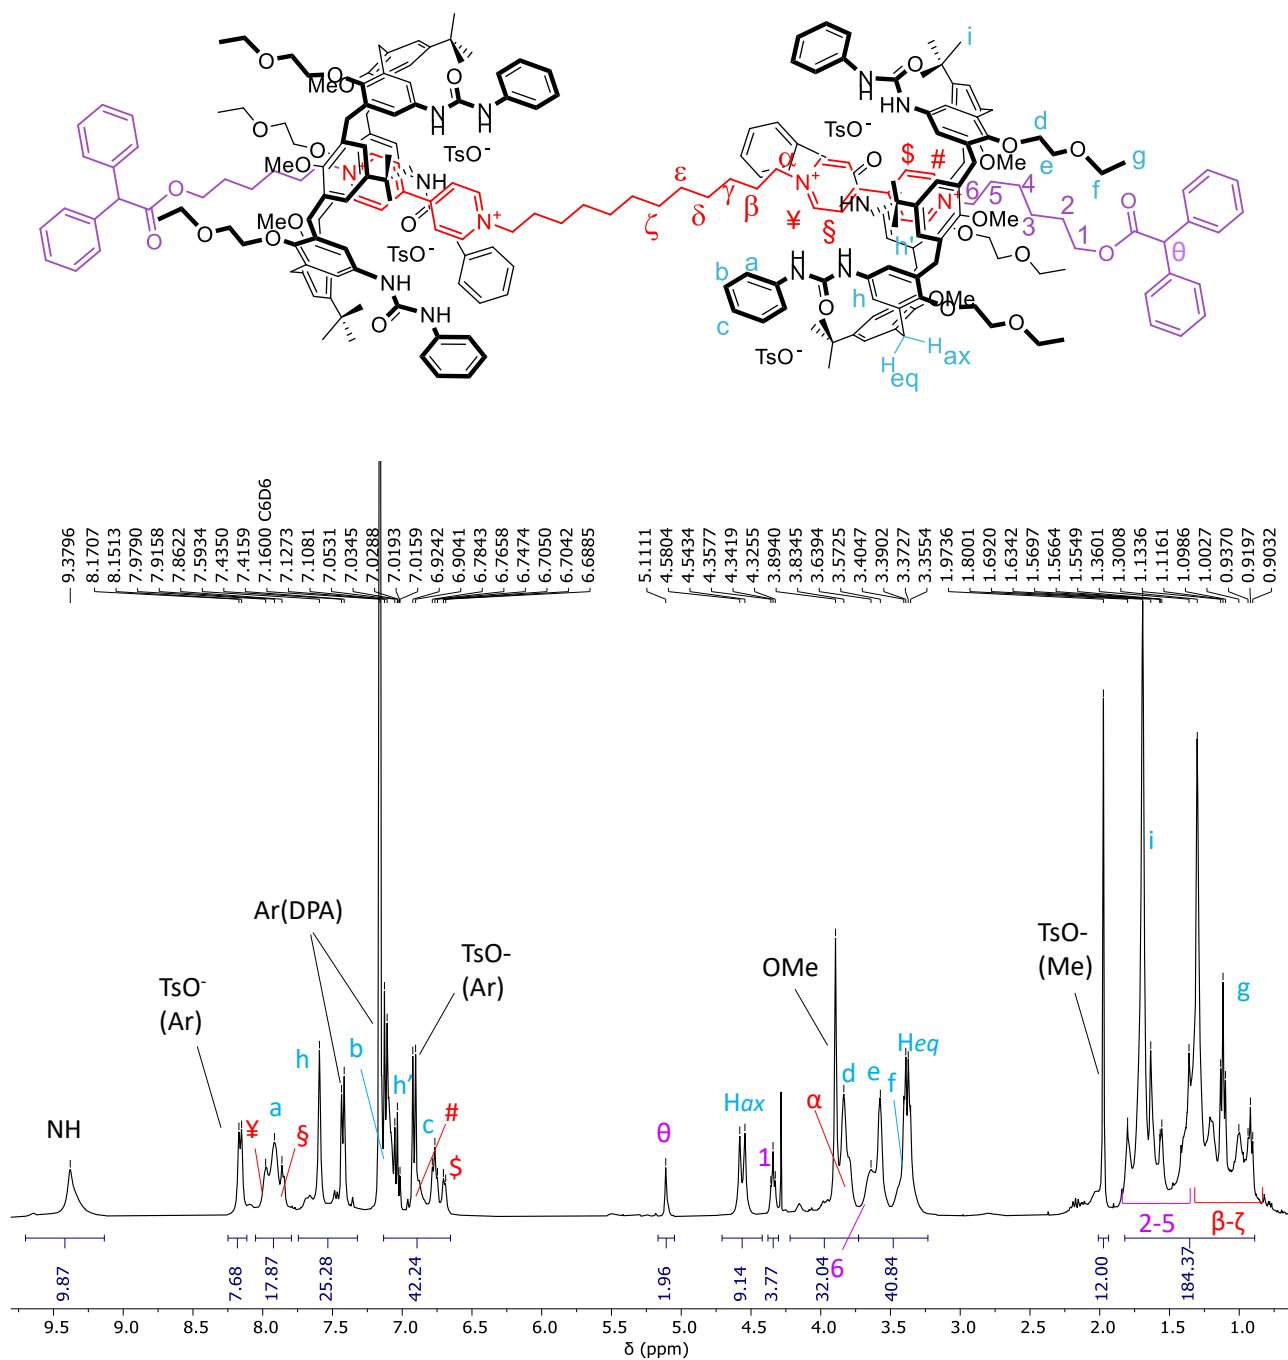

Figure S29:  $^1\text{H}$  NMR spectrum (400 MHz, benzene- $d_6$ ) of [3]rotaxane  $R[(\text{TPU})_2\supset 6_{12}]$ .



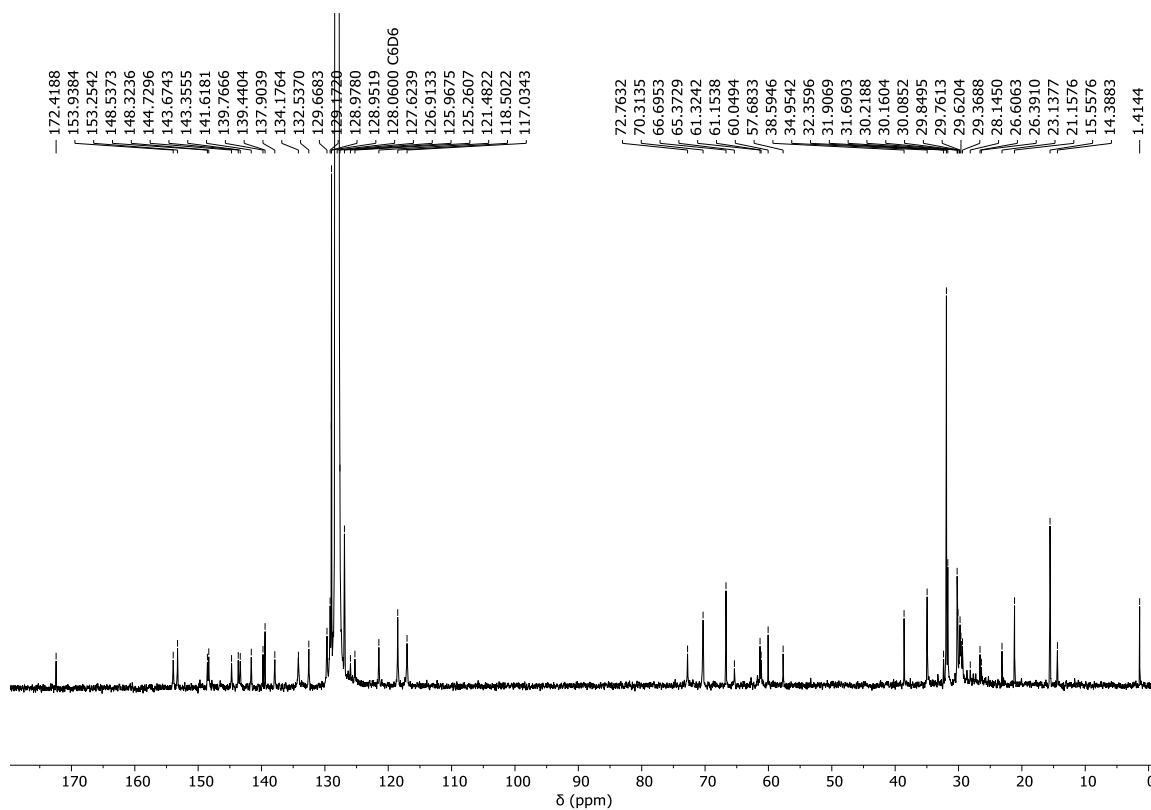

**Figure S30:**  $^{13}\text{C}$  NMR spectrum (100 MHz, benzene- $d_6$ ) of [3]rotaxane  $R[(\text{TPU})_2>612]$ .

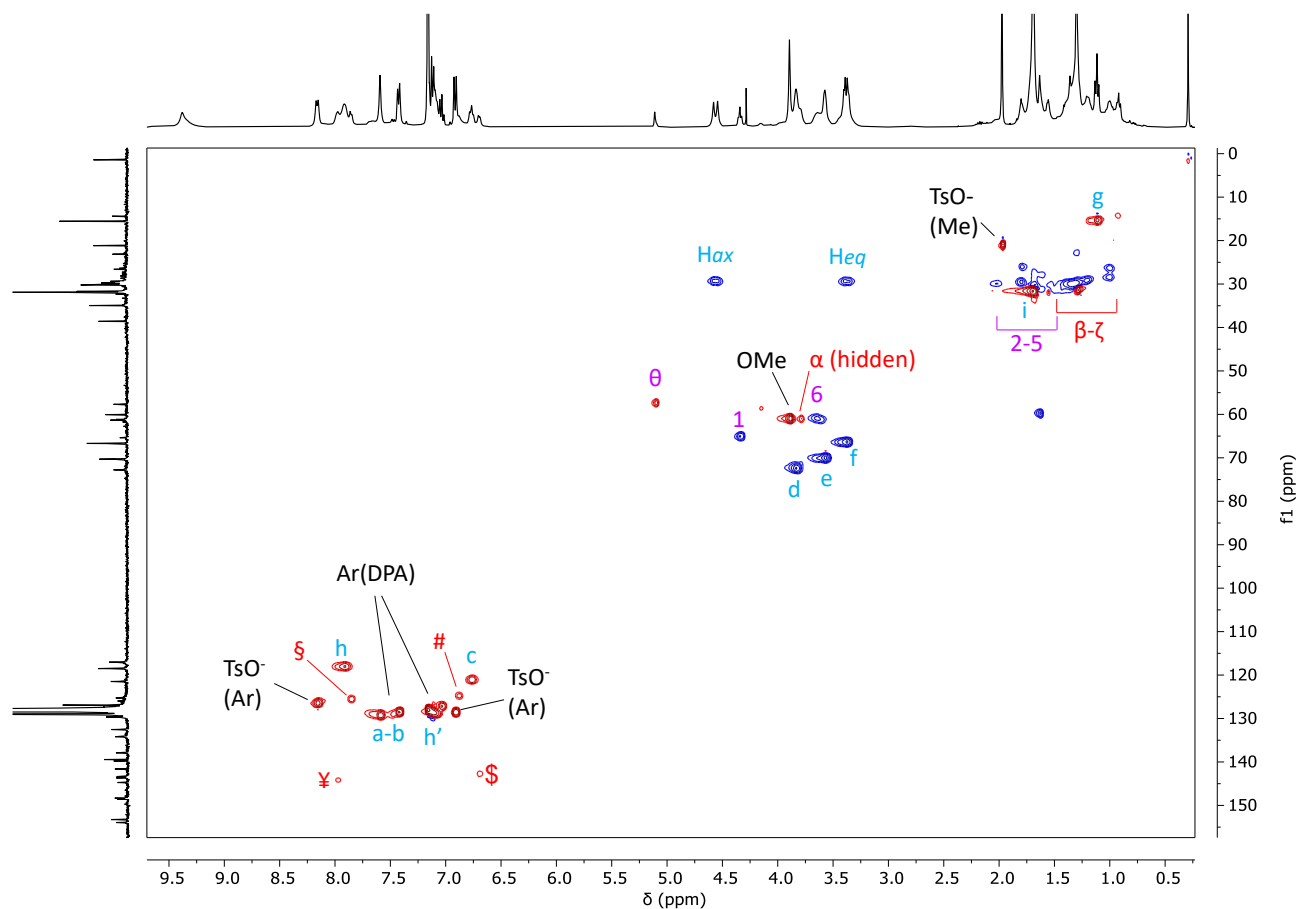

**Figure S31:** Edited HSQC NMR spectrum (400 MHz, benzene- $d_6$ ) of [3]rotaxane  $R[(\text{TPU})_2>612]$ . Positive peaks ( $\text{CH}_3$  and  $\text{CH}$ ) are shown in red, while negative ones ( $\text{CH}_2$ ) are in blue.

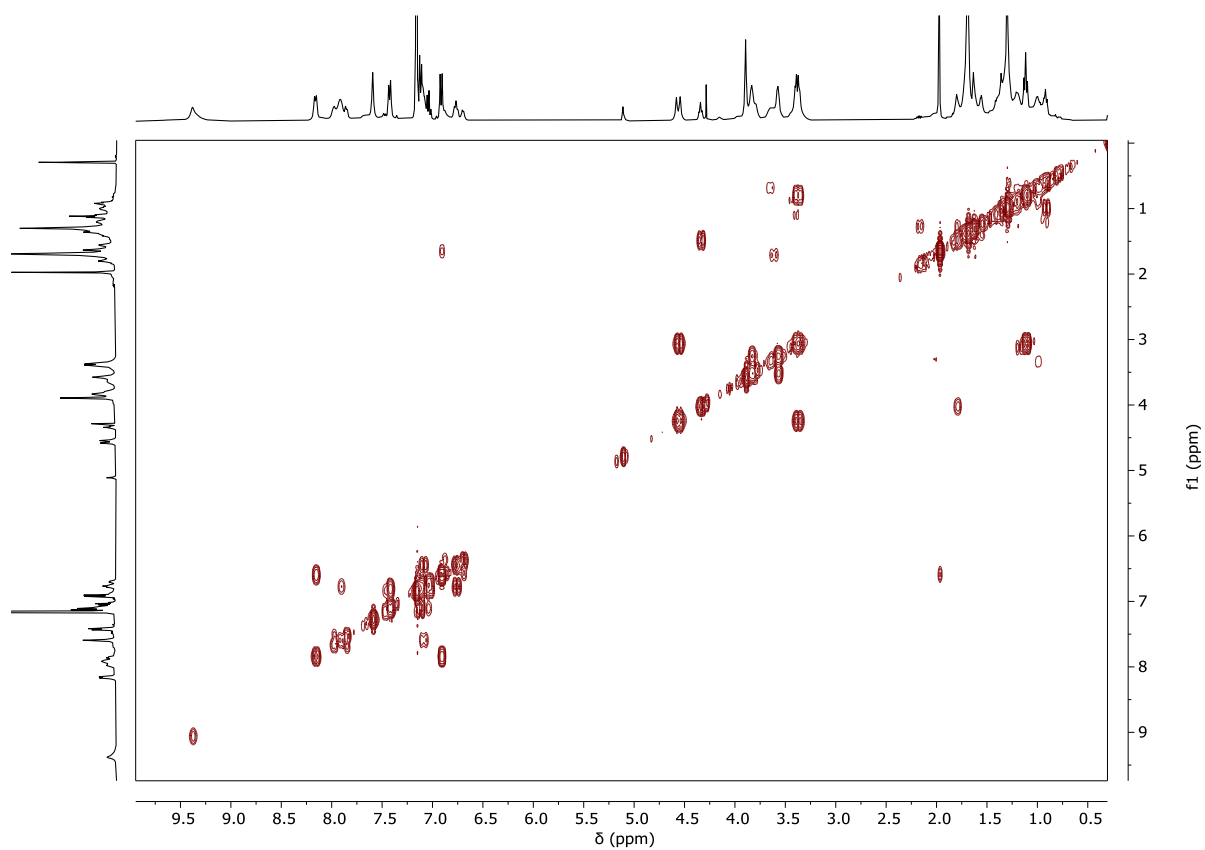

**Figure S32:** 2D magnitude g-COSY NMR spectrum (400 MHz, benzene- $d_6$ , 25 °C) of [3]rotaxane  $R[(TPU)_2\supset 6_{12}]$ .

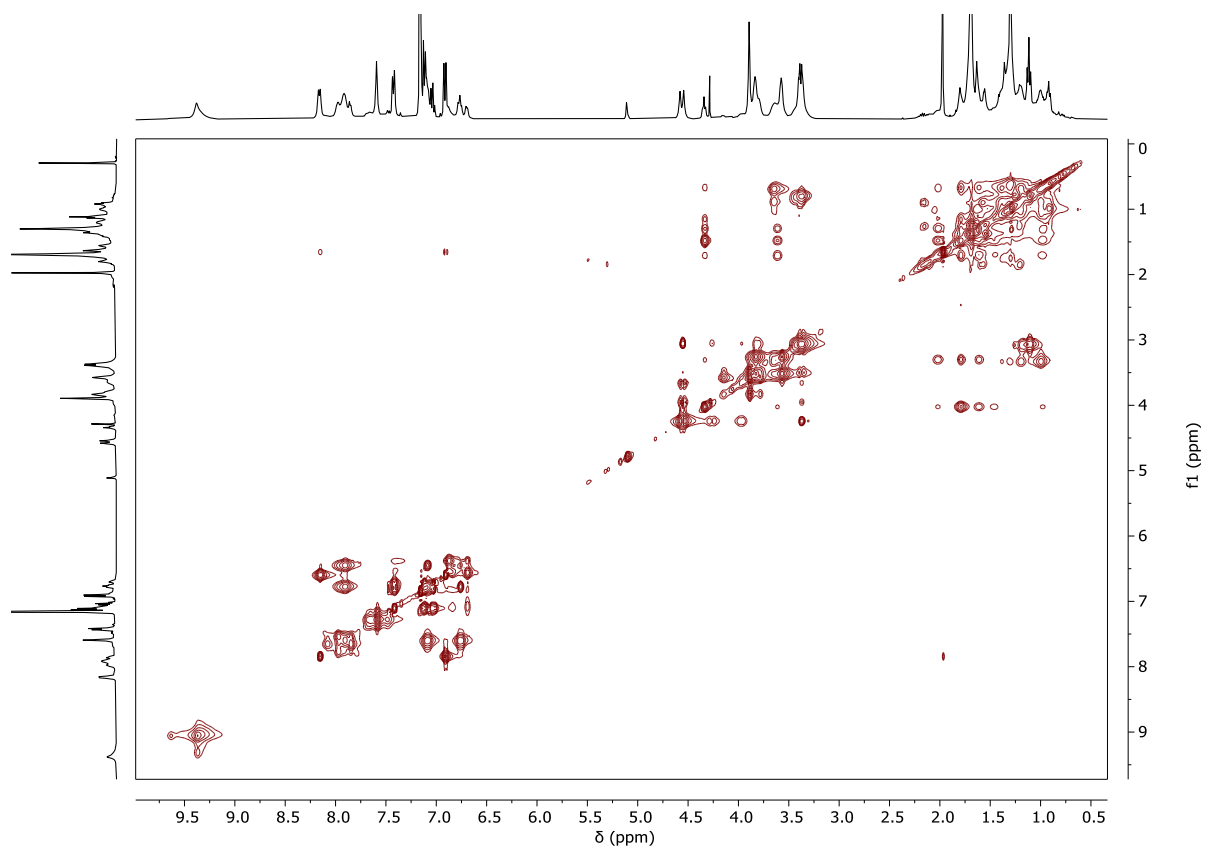

**Figure S33:** 2D TOCSY NMR spectrum (400 MHz, benzene- $d_6$ , MT = 0.06 s) of [3]rotaxane  $R[(TPU)_2\supset 6_{12}]$ .

gor6\_151012102734 #1-3 RT: 0.02-0.15 AV: 3 NL: 3.19E4  
T: FTMS + p ESI Full ms [1500.00-4000.00]

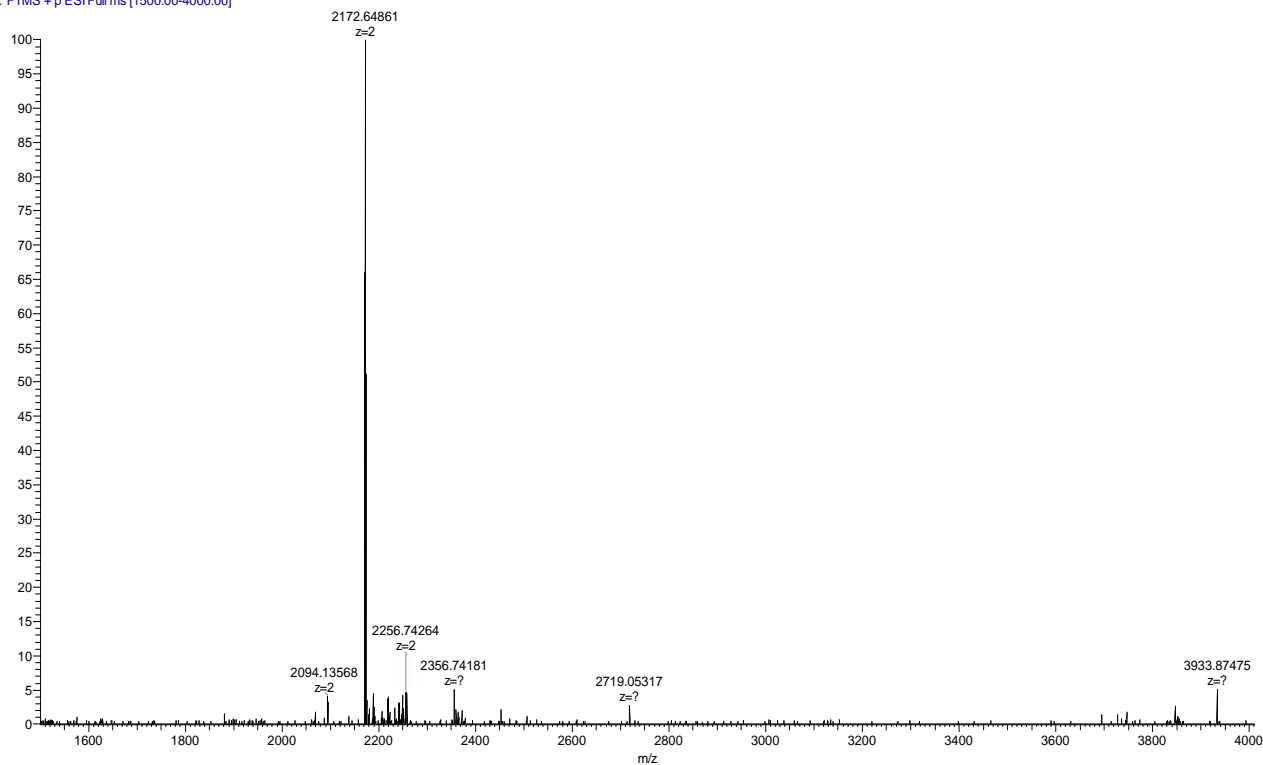

**Figure S34:** HR-MS (ESI, Orbitrap LQ) spectrum of [3]rotaxane R[(TPU)<sub>2</sub>⊃**6**<sub>12</sub>].

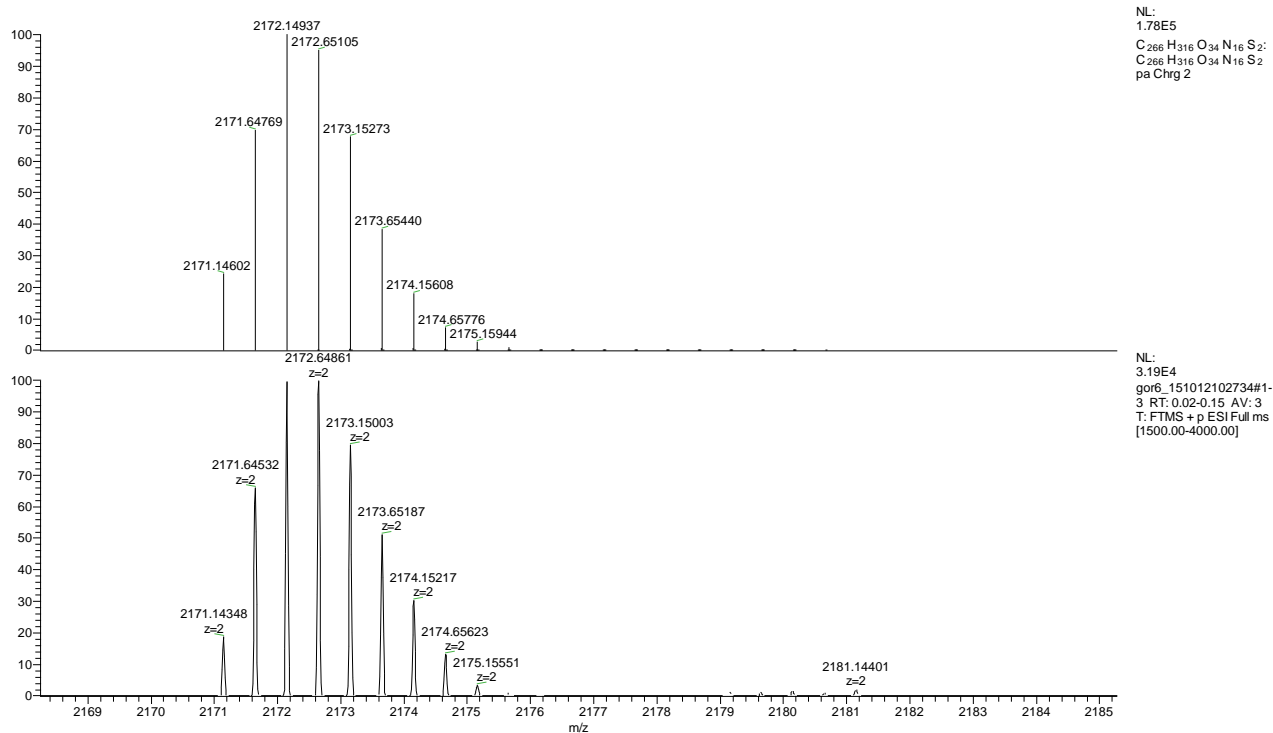

**Figure S35:** Inset of HR-MS (ESI, Orbitrap LQ) spectrum of compound R[(TPU)<sub>2</sub>⊃**6**<sub>12</sub>]: calculated (top) and experimental (down) isotopic distribution for the singly charged molecular ion.

# Characterisation of $R[(\text{TPU})_2 \supset 7_{12}]$

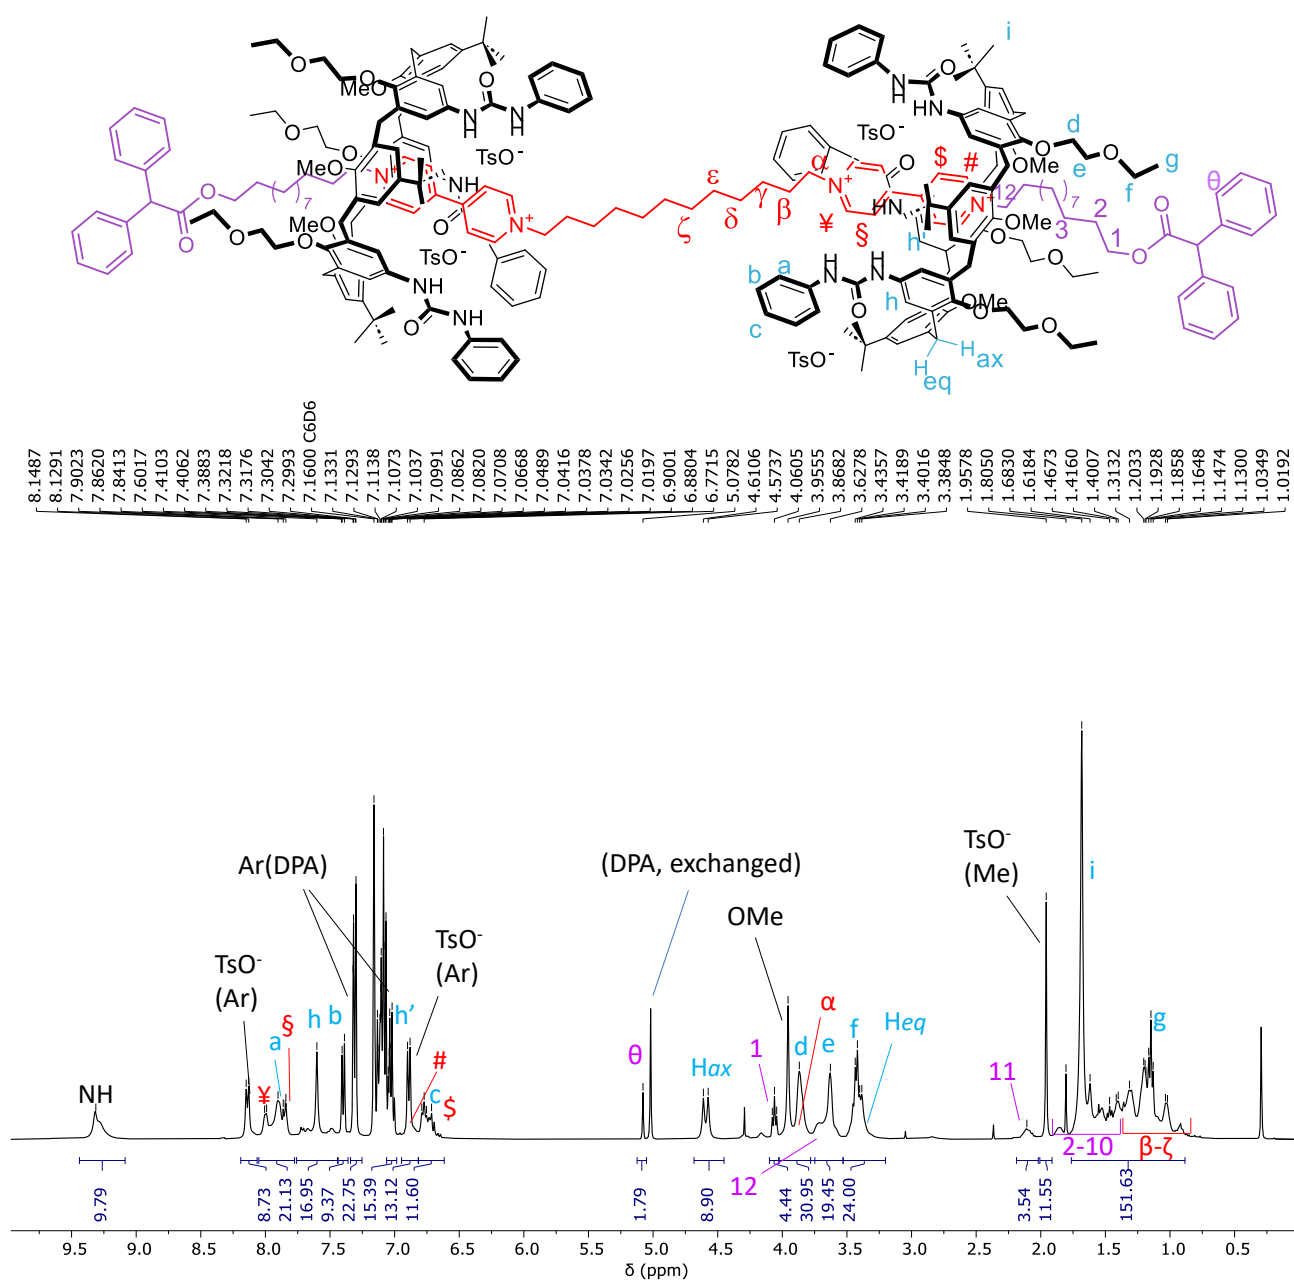

**Figure S36:**  $^1\text{H}$  NMR spectrum (400 MHz, benzene- $d_6$ ) of [3]rotaxane  $R[(\text{TPU})_2 \supset 7_{12}]$ . The resonance with the DPA label at 5.02 ppm is associated with the signal of the diphenylacetate methine proton that exchanged the tosylates upon axle stoppering.

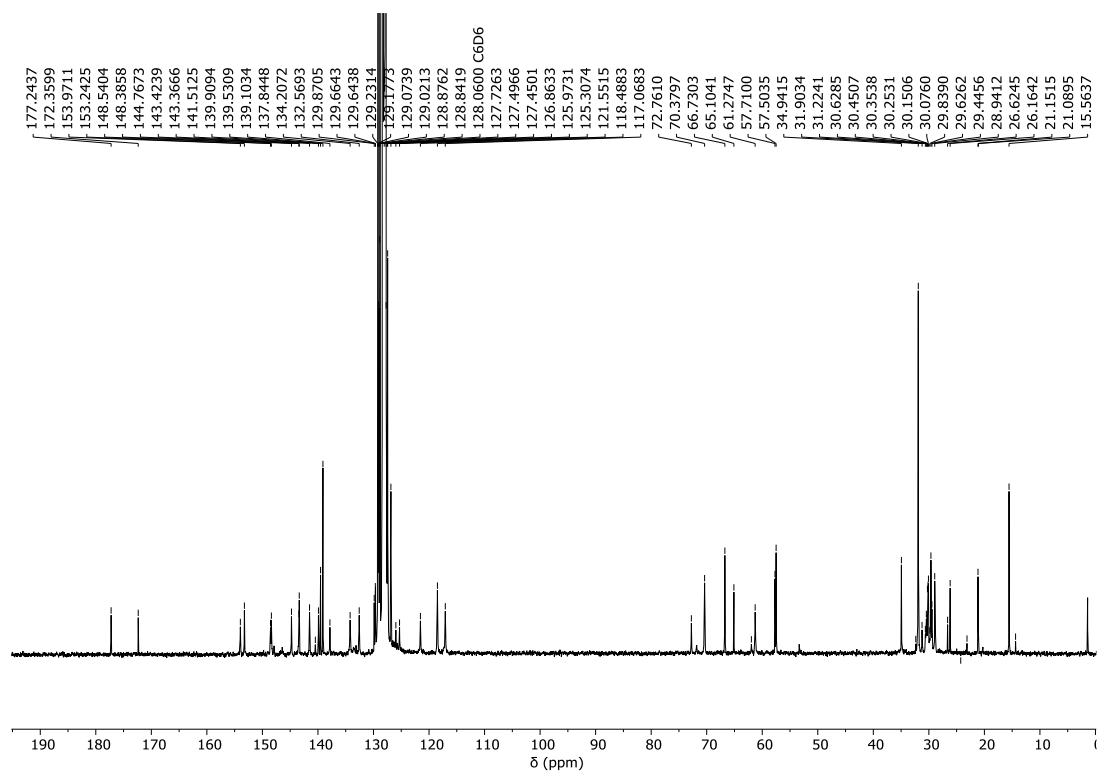

**Figure S37:**  $^{13}\text{C}$  NMR spectrum (100 MHz, benzene- $d_6$ ) of [3]rotaxane  $R[(\text{TPU})_2>7]_{12}$ .

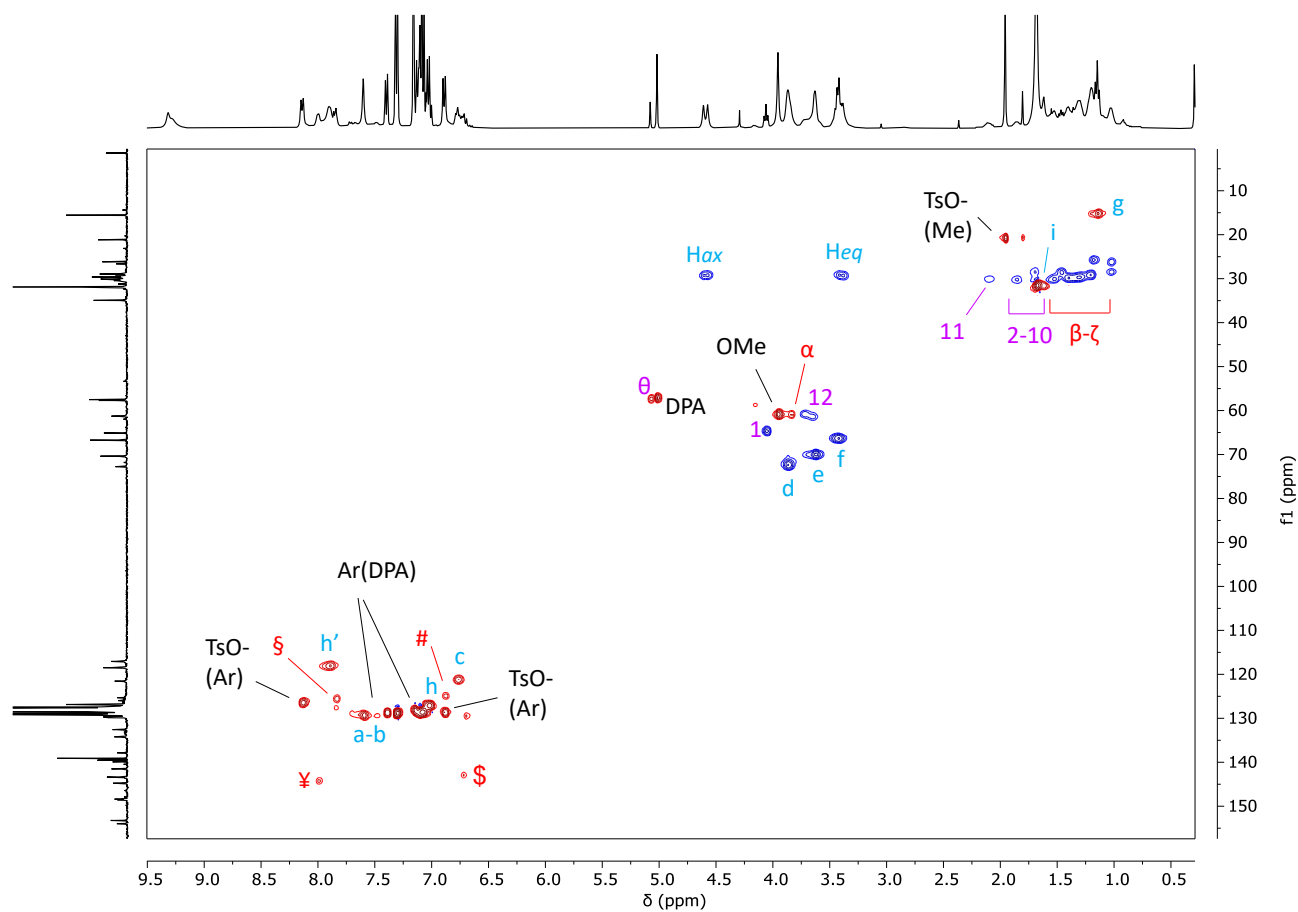

**Figure S38:** Edited HSQC NMR spectrum (400 MHz, benzene- $d_6$ ) of [3]rotaxane  $R[(\text{TPU})_2>7]_{12}$ . Positive peaks ( $\text{CH}_3$  and  $\text{CH}$ ) are shown in red, while negative ones ( $\text{CH}_2$ ) are in blue.

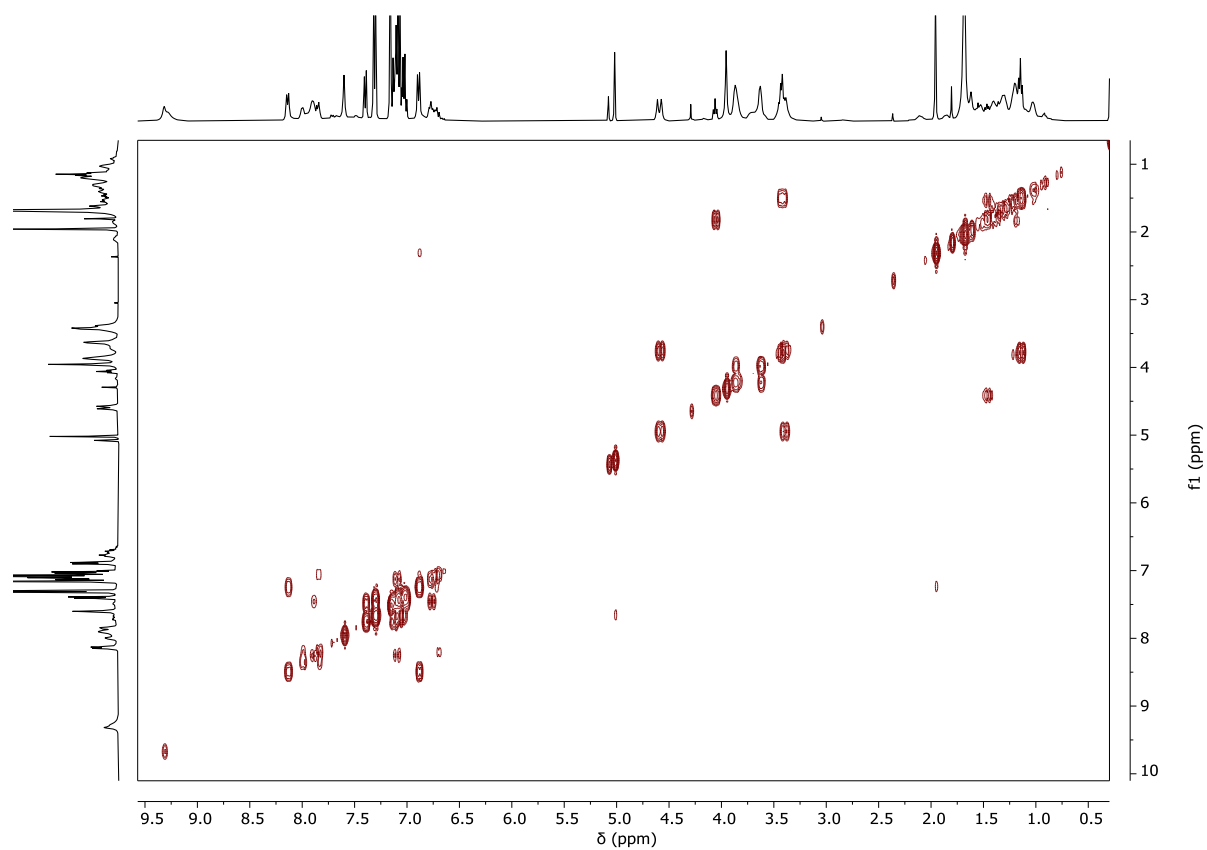

**Figure S39:** 2D magnitude g-COSY NMR spectrum of [3]rotaxane  $R[(\text{TPU})_2>7_{12}]$  (400 MHz, benzene- $d_6$ ).

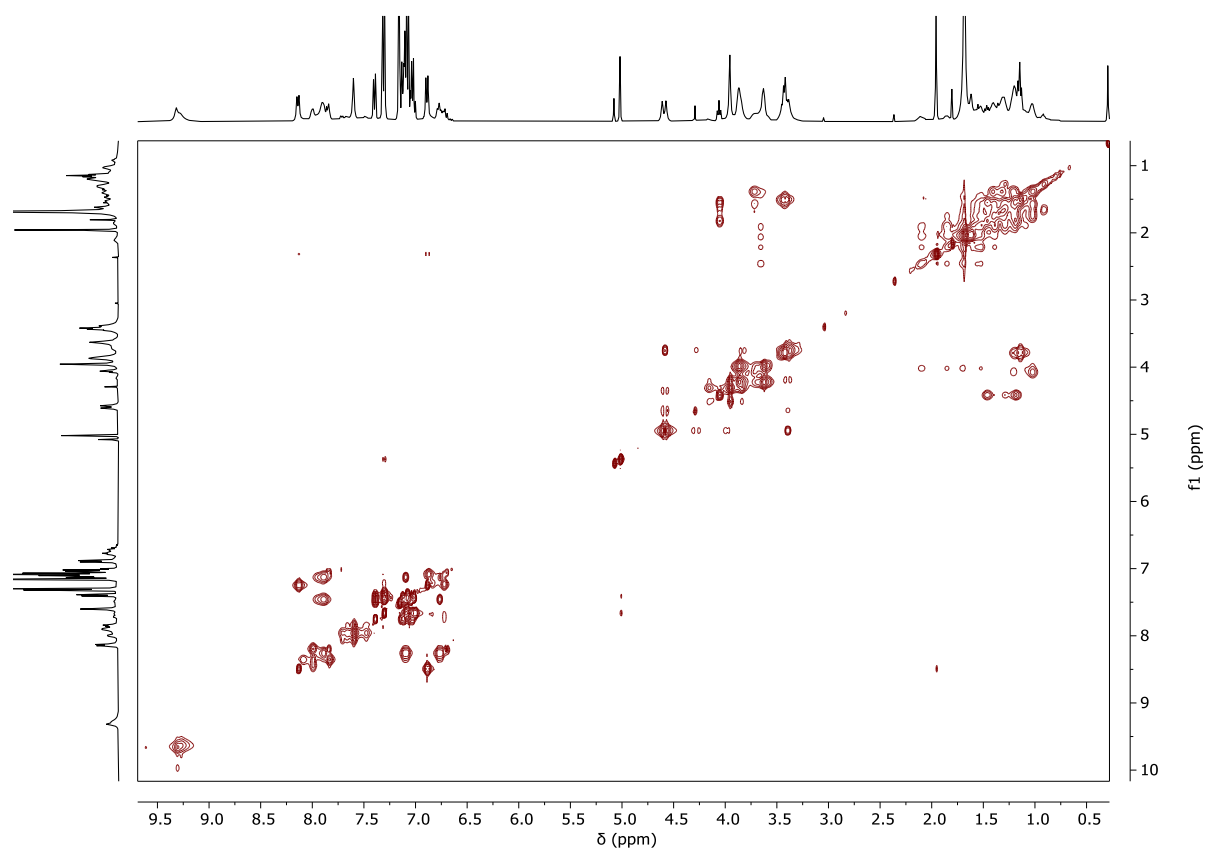

**Figure S40:** 2D TOCSY NMR spectrum (400 MHz, benzene- $d_6$ , MT = 0.06 s) of [3]rotaxane  $R[(\text{TPU})_2>7_{12}]$ .

ep81\_151023100221 #1 RT: 0.00 AV: 1 NL: 1.75E5  
T: FTMS + p ESI Full ms [200.00-2000.00]

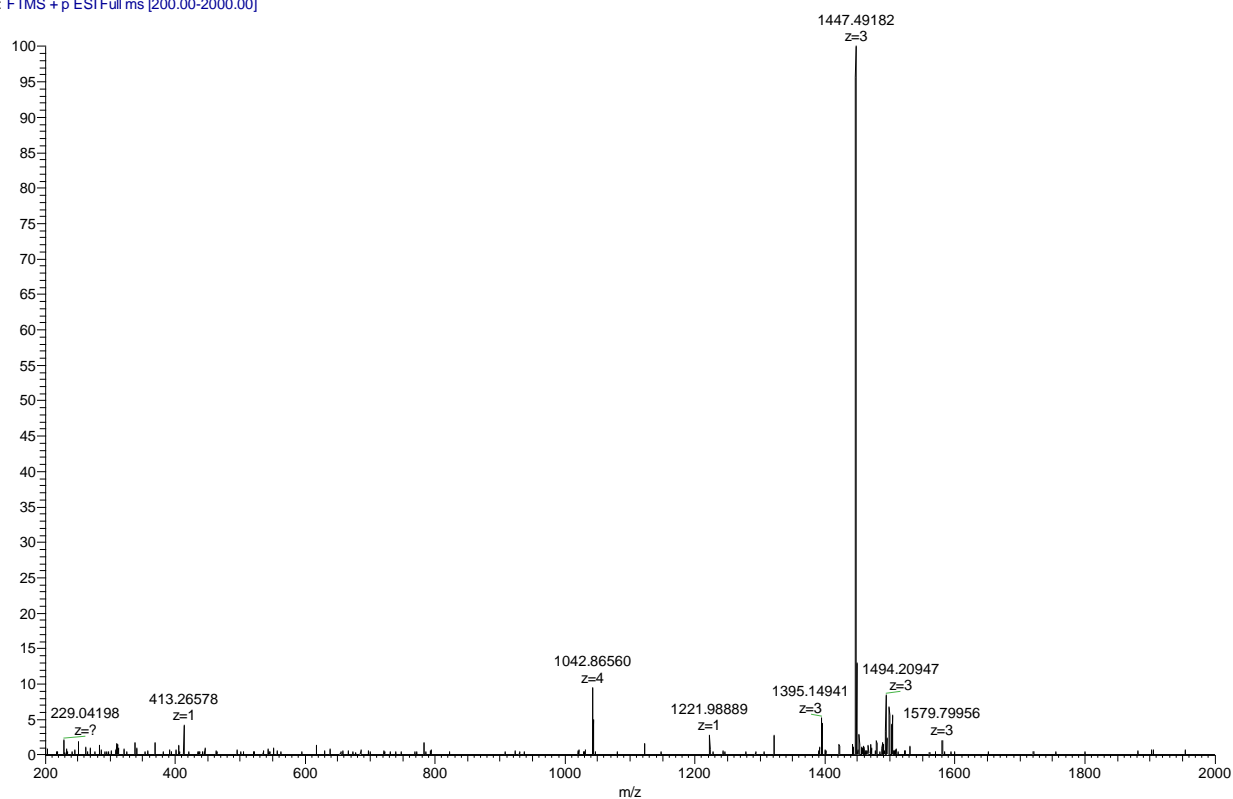

**Figure S41:** HR-MS (ESI, Orbitrap LQ) spectrum of [3]rotaxane R[(TPU)<sub>2</sub>>7]<sub>12</sub> showing the triply charged molecular ion.

ep81\_151023093556 #737 RT: 17.50 AV: 1 NL: 1.19E7  
T: FTMS + p ESI Full ms [900.00-3000.00]

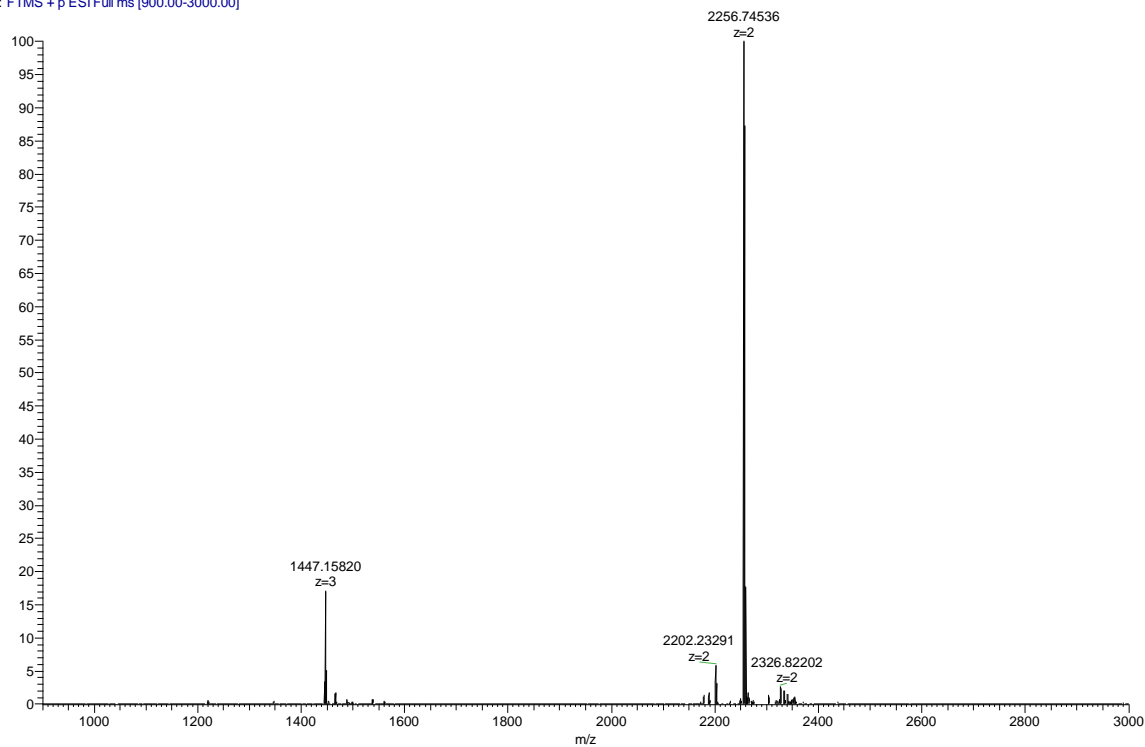

**Figure S42:** HR-MS (ESI, Orbitrap LQ) spectrum of [3]rotaxane R[(TPU)<sub>2</sub>>7]<sub>12</sub> showing the doubly charged molecular ion.

# Characterisation of $R[(\text{TPU})_2 \supset 8_{12}]$

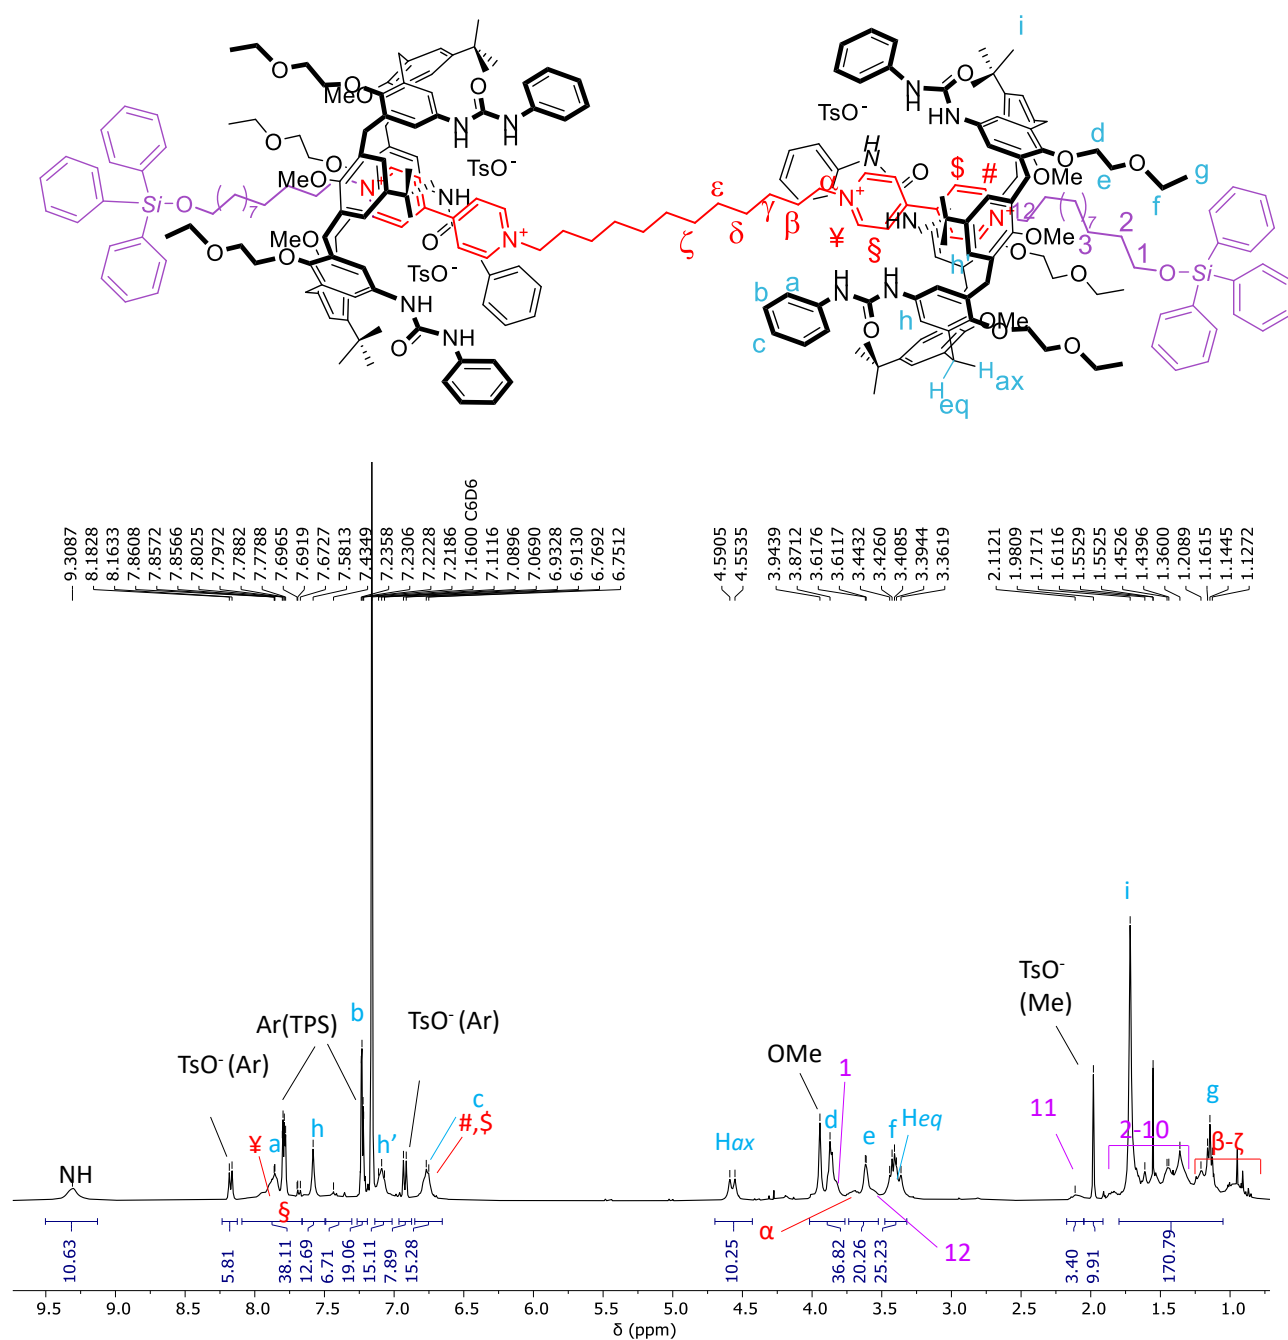

Figure S43:  $^1\text{H}$  NMR spectrum (400 MHz, benzene- $d_6$ ) of [3]rotaxane  $R[(\text{TPU})_2 \supset 8_{12}]$ .



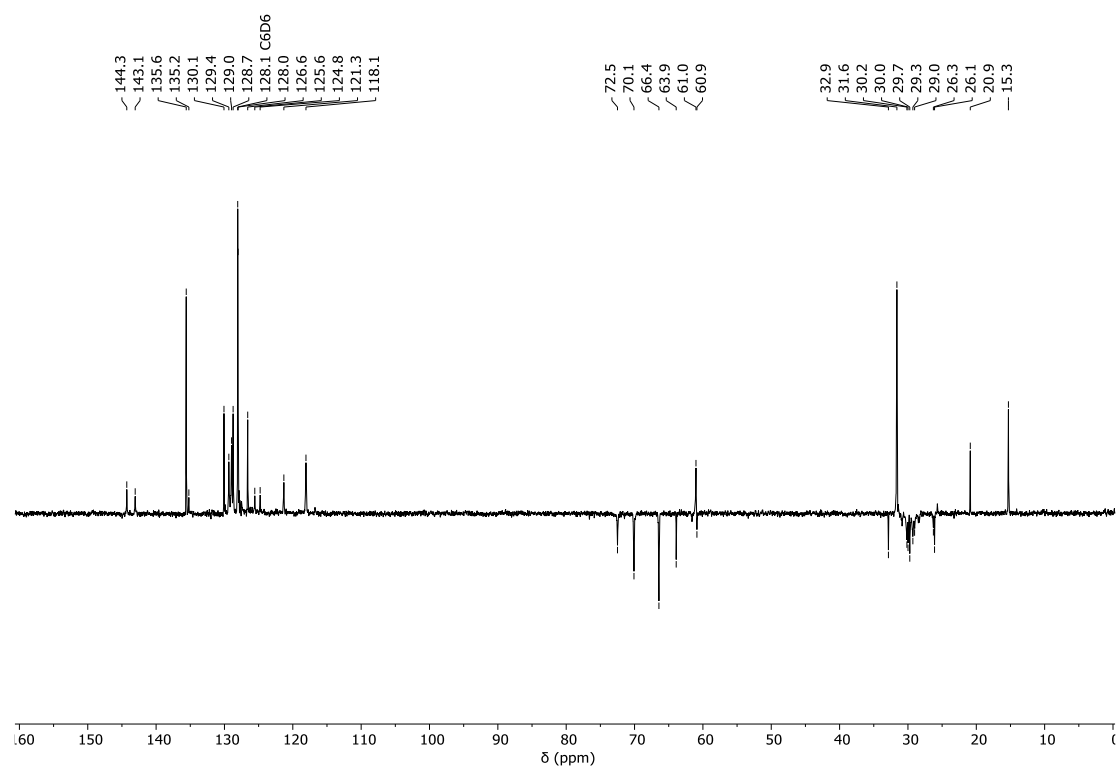

**Figure S44:**  $^{13}\text{C}$ -APT NMR spectrum (100 MHz, benzene- $\text{d}_6$ ) of [3]rotaxane  $R[(\text{TPU})_2>812]$ .

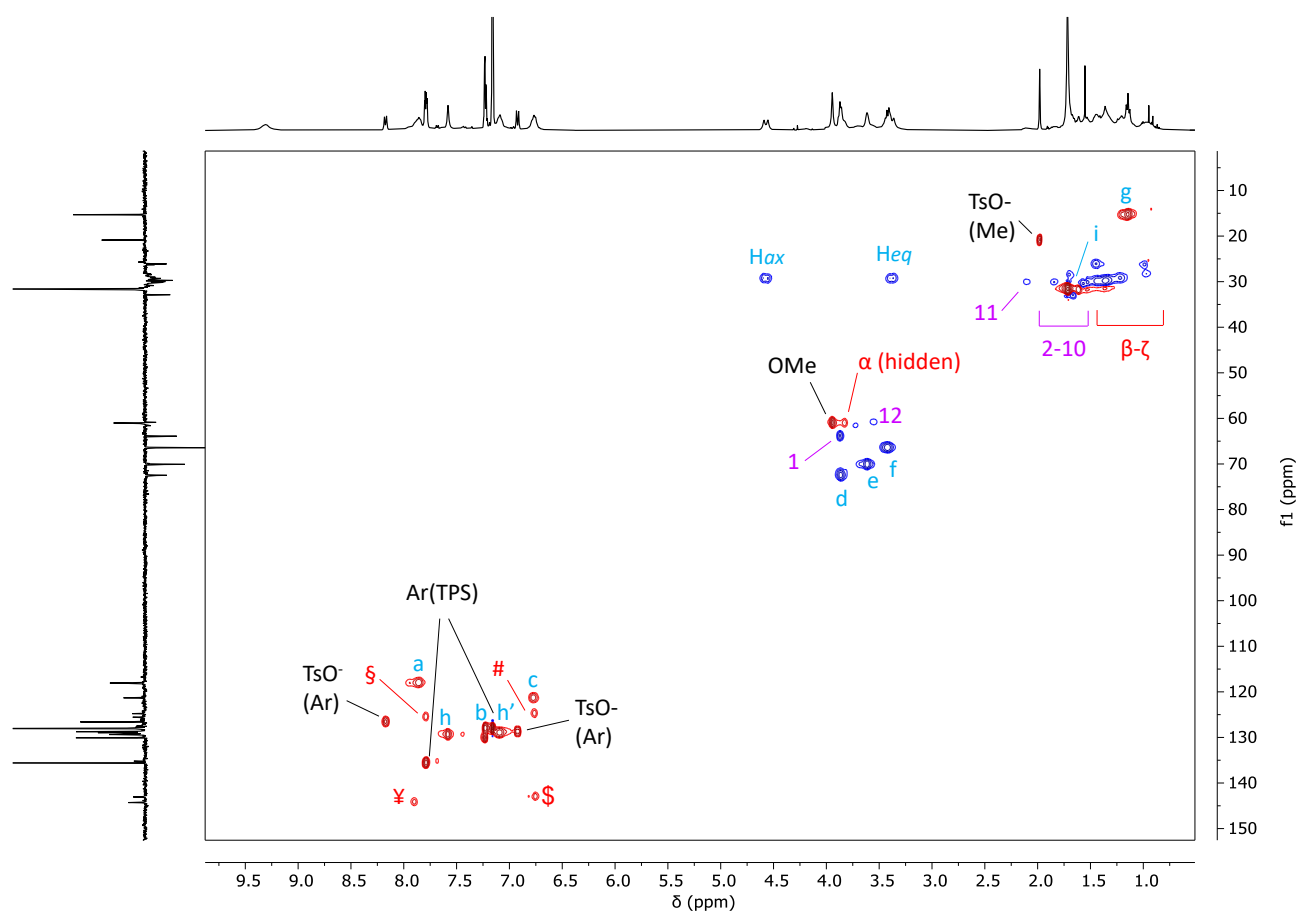

**Figure S45:** Edited HSQC NMR spectrum (400 MHz, benzene- $\text{d}_6$ ) of [3]rotaxane  $R[(\text{TPU})_2>812]$ . Positive peaks ( $\text{CH}_3$  and  $\text{CH}$ ) are shown in red, while negative ones ( $\text{CH}_2$ ) are in blue.

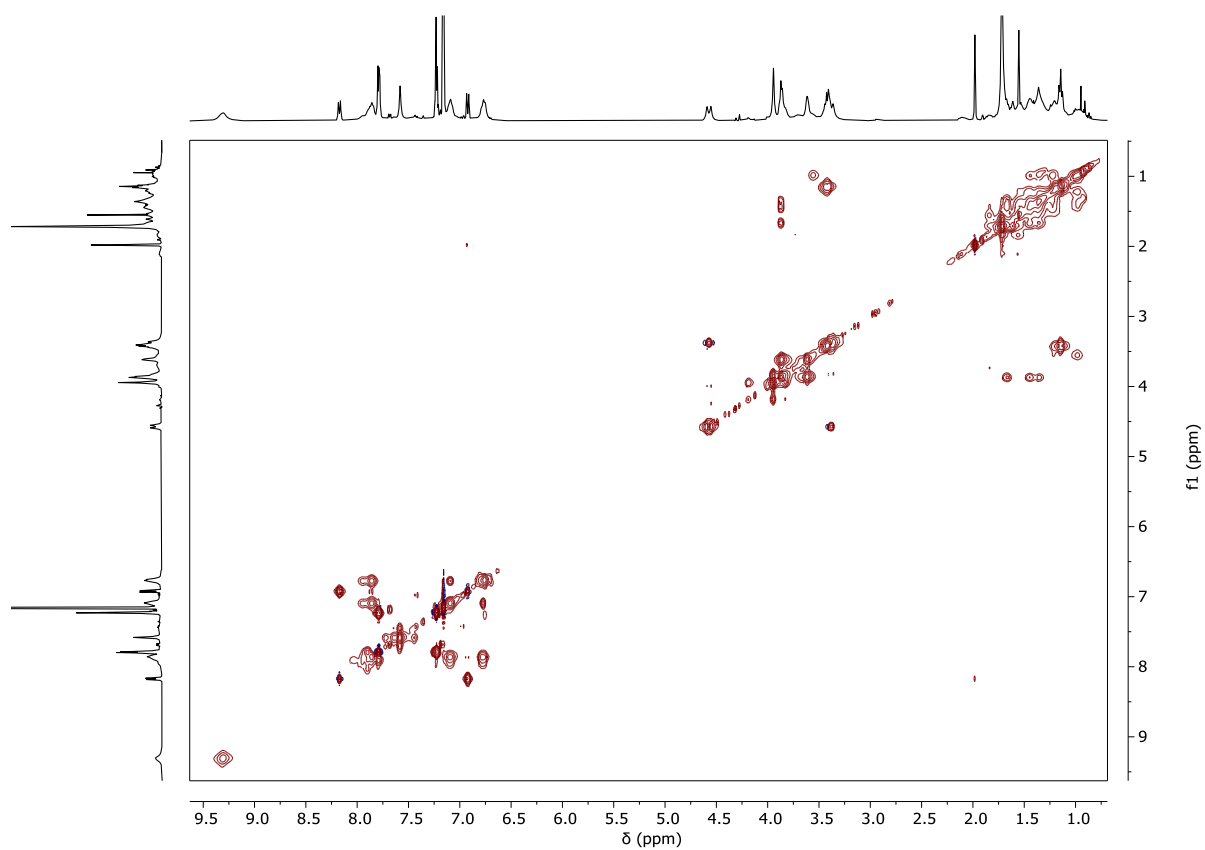

**Figure S46:** 2D TOCSY NMR spectrum (400 MHz, benzene-d<sub>6</sub>, MT = 0.06 s) of [3]rotaxane R[(TPU)<sub>2</sub>⊃8<sub>12</sub>].

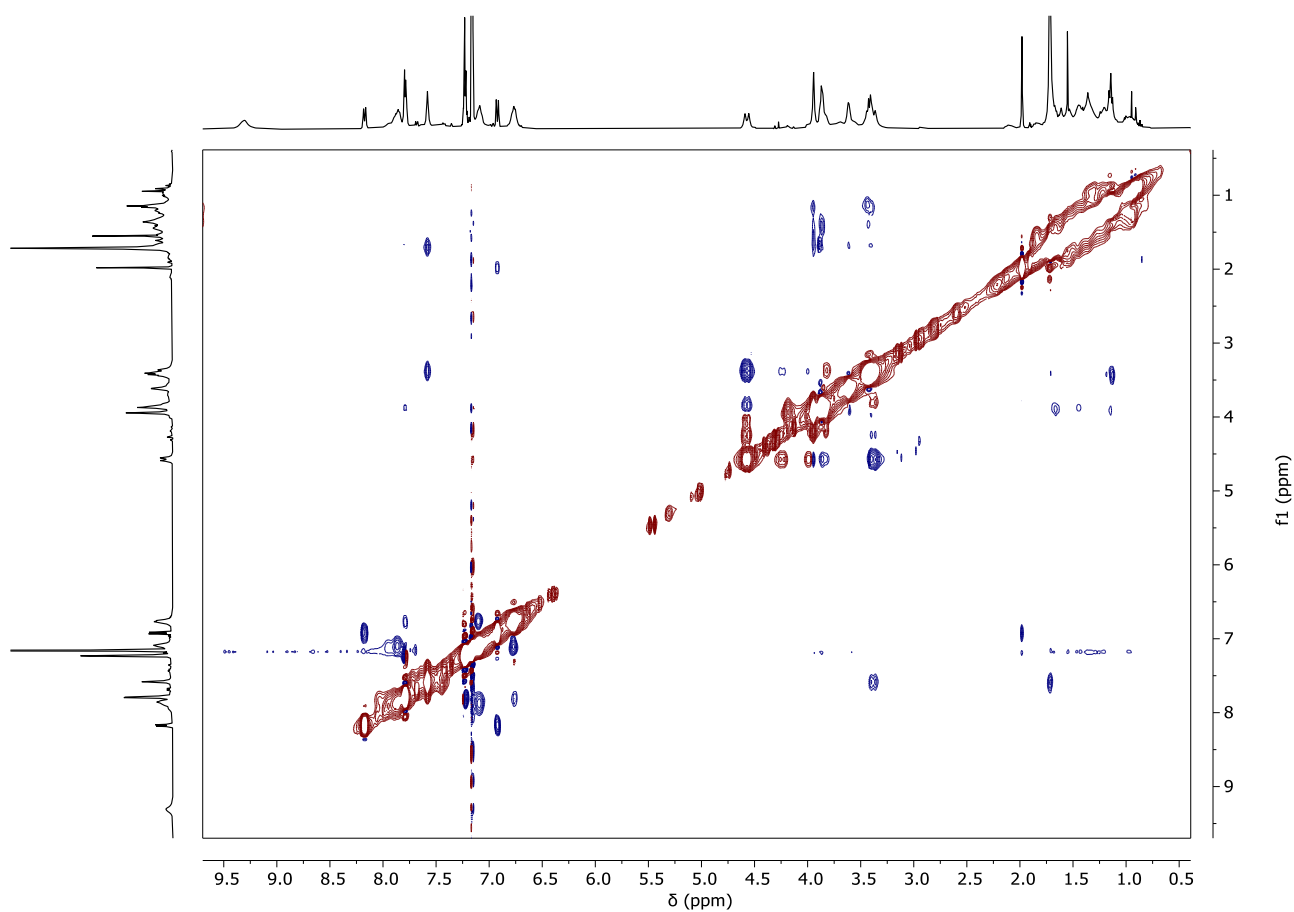

**Figure S47:** 2D ROESY NMR spectrum (400 MHz, benzene-d<sub>6</sub>, SL = 200 ms) of [3]rotaxane R[(TPU)<sub>2</sub>⊃8<sub>12</sub>].

fc301\_221107120509 #14-24 RT: 0.31-0.50 AV: 11 NL: 1.22E6  
T: FTMS + p ESI Full ms [1000.00-3000.00]

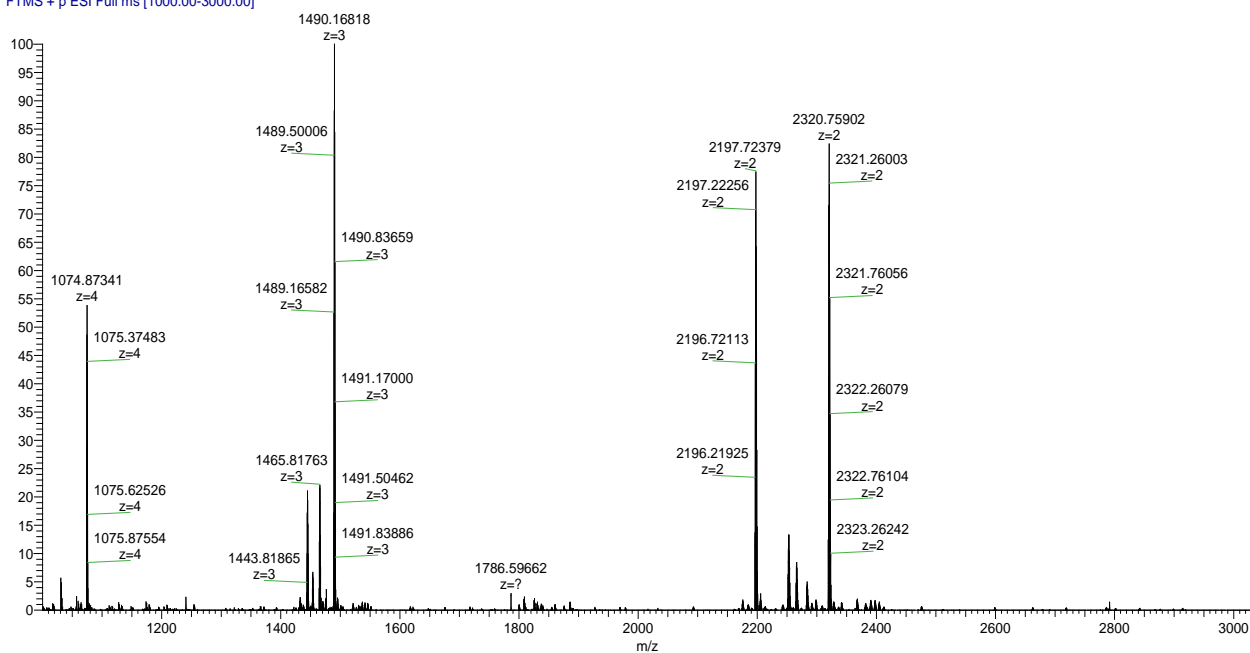

**Figure S48:** HR-MS (ESI, Orbitrap LQ) spectrum of [3]rotaxane R[(TPU)<sub>2</sub>⊃812] showing the quadruple, triply and doubly charged molecular ions.

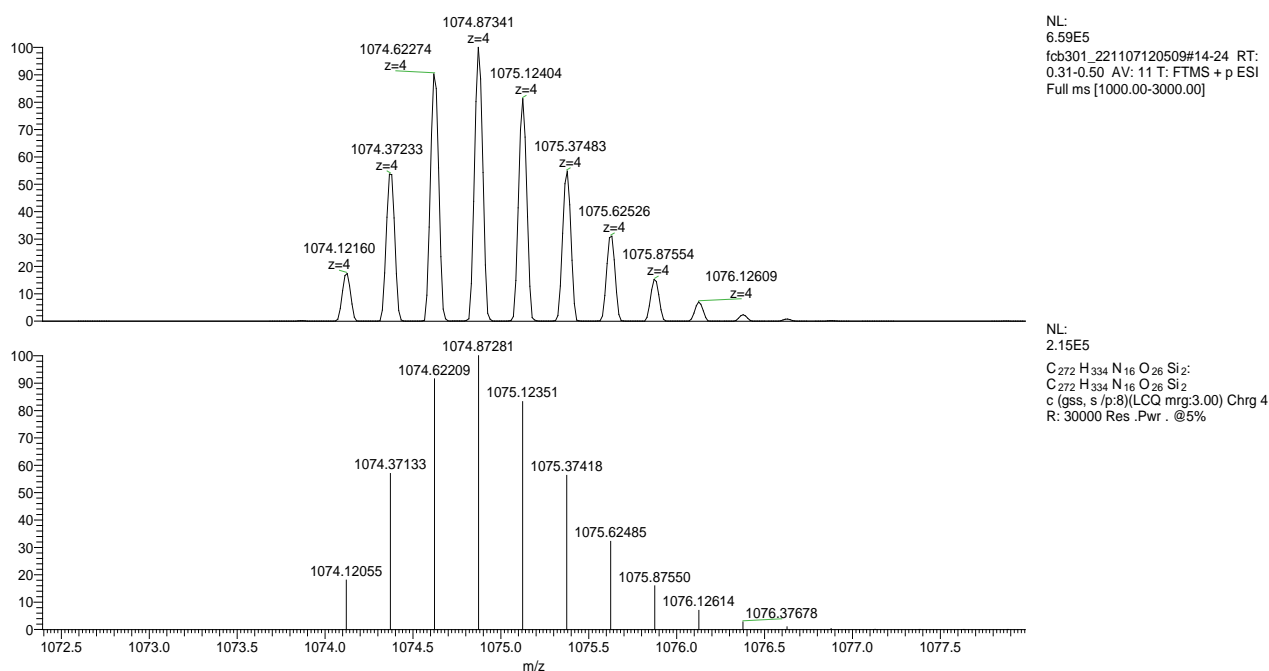

**Figure S49:** Inset of HR-MS (ESI, Orbitrap LQ) spectrum of compound R[(TPU)<sub>2</sub>⊃812]: calculated (top) and experimental (down) isotopic distribution for the quadruple charged molecular ion.

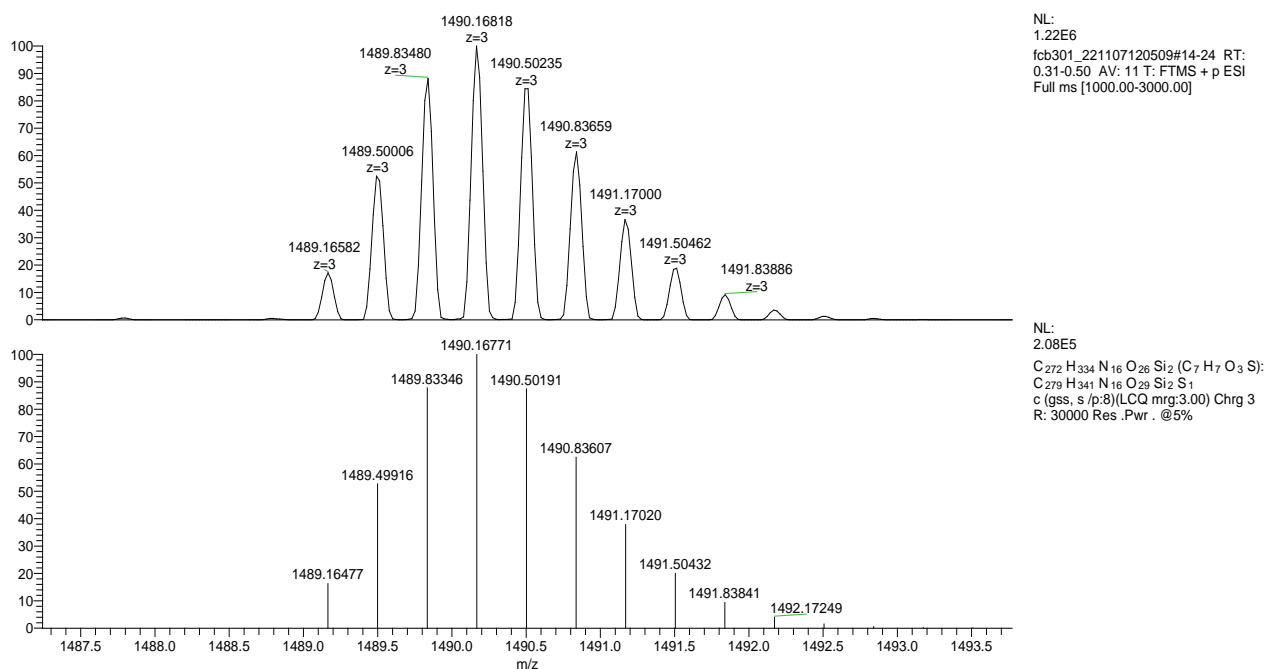

**Figure S50:** Inset of HR-MS (ESI, Orbitrap LQ) spectrum of compound  $R[(TPU)_2O_8]^{2-}$ : calculated (top) and experimental (down) isotopic distribution for the triply charged molecular ion.

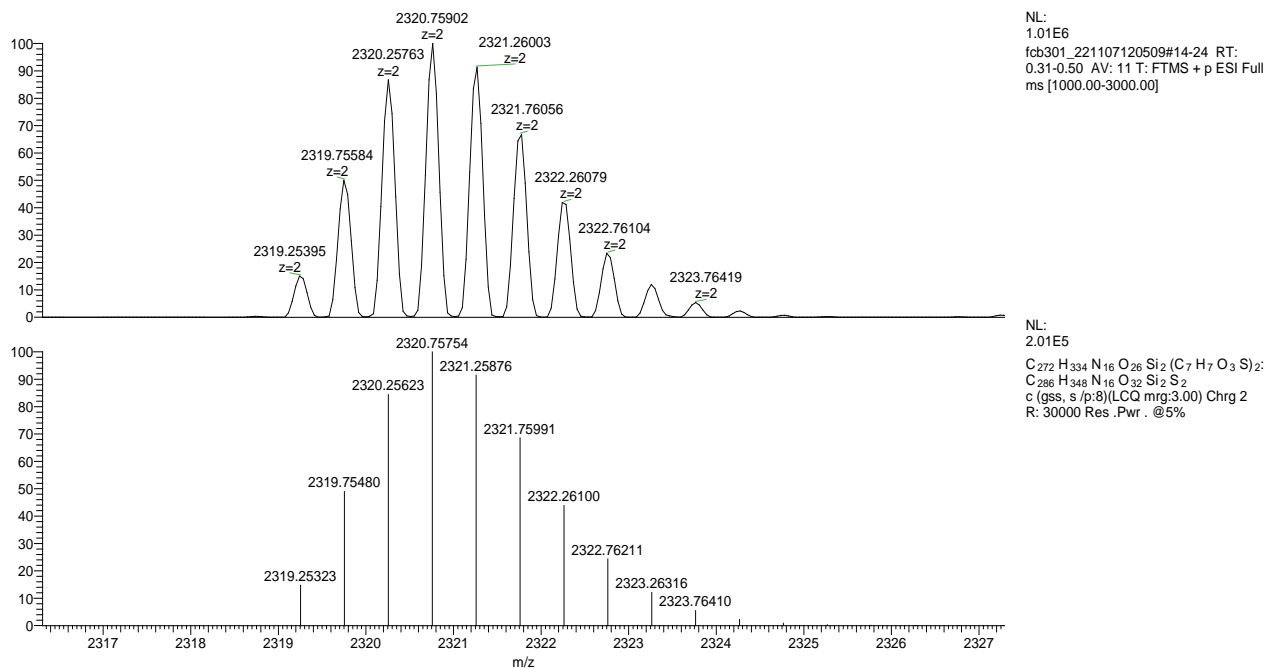

**Figure S51:** Inset of HR-MS (ESI, Orbitrap LQ) spectrum of compound  $R[(TPU)_2O_8]^{2-}$ : calculated (top) and experimental (down) isotopic distribution for the doubly charged molecular ion.

# Characterisation of $P[(\text{TPU-ES})_2\supset 5_{12}]$

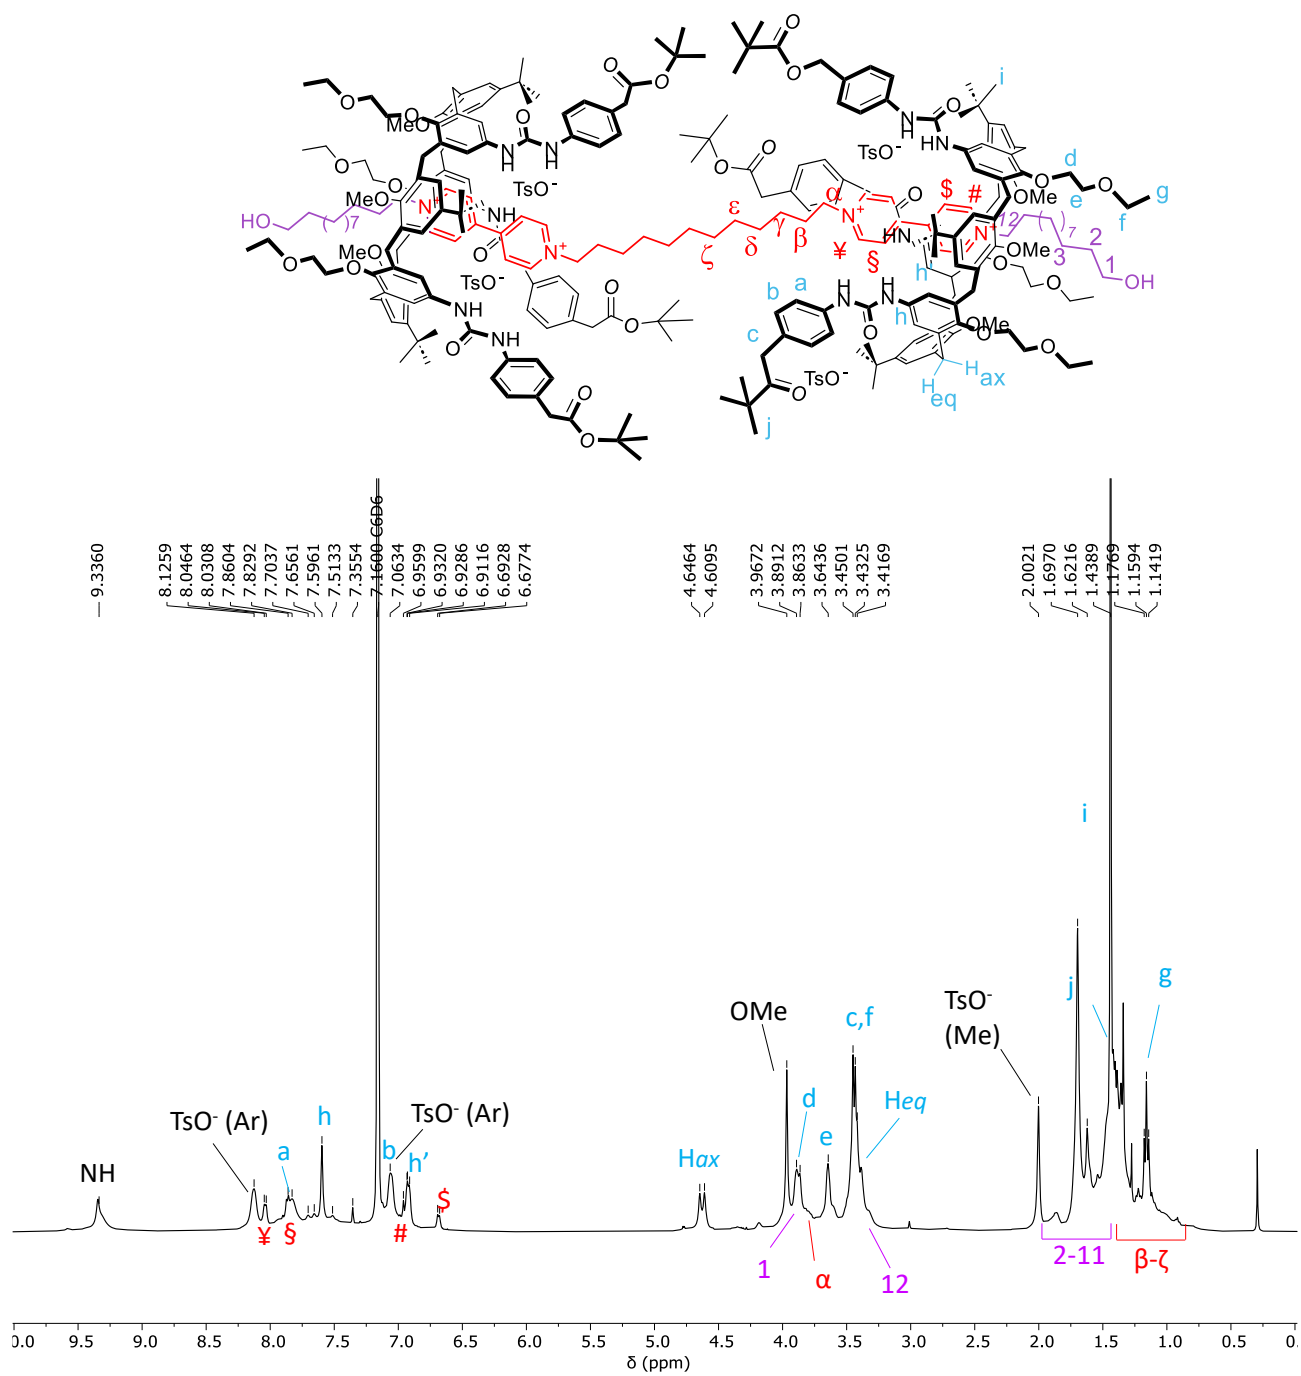

Figure S52:  $^1\text{H}$  NMR spectrum (400 MHz,  $\text{benzene-d}_6$ ) of [3]pseudorotaxane  $P[(\text{TPU-ES})_2\supset 5_{12}]$ .

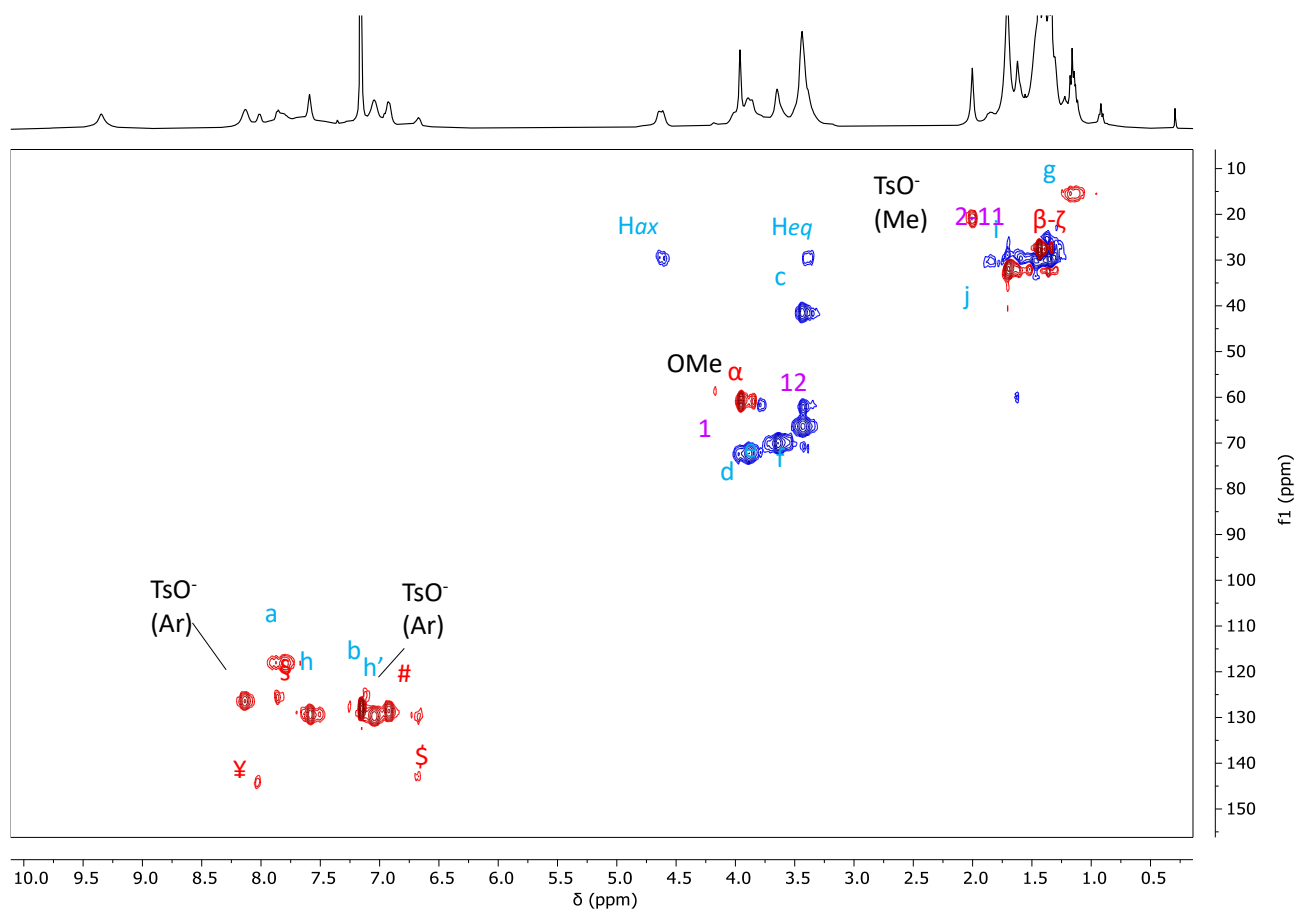

**Figure S53:** Edited HSQC NMR spectrum (400 MHz, benzene- $d_6$ ) of [3]pseudorotaxane  $P[(\text{TPU-ES})_2 \supset 5_{12}]$ . Positive peaks ( $\text{CH}_3$  and  $\text{CH}$ ) are shown in red, while negative ones ( $\text{CH}_2$ ) are in blue.

# Characterisation of $R[(\text{TPU-ES})_2\supset 7_{12}]$

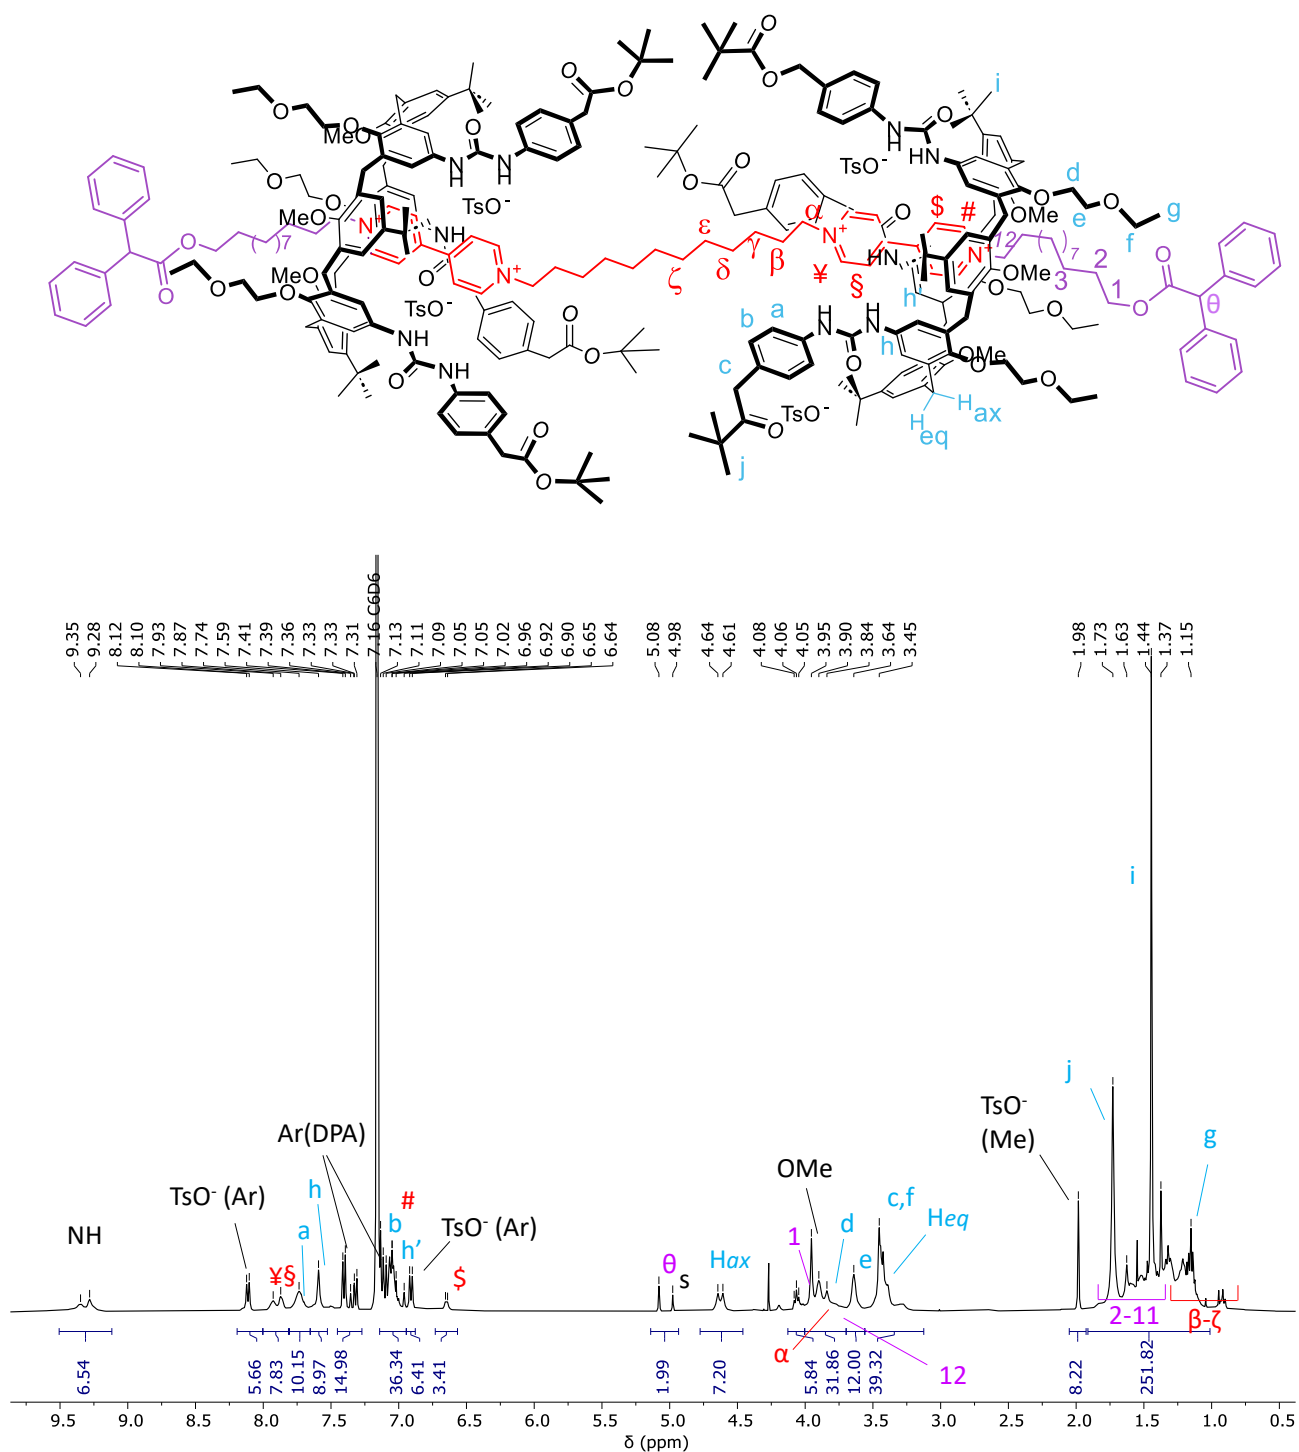

**Figure S54:**  $^1\text{H}$  NMR spectrum (400 MHz, benzene- $d_6$ ) of [3]rotaxane  $R[(\text{TPU-ES})_2\supset 7_{12}]$ . The resonance with the S label at 5.02 ppm is associated with the signal of the diphenylacetate methine proton that exchanged the tosylates upon axle stoppering.

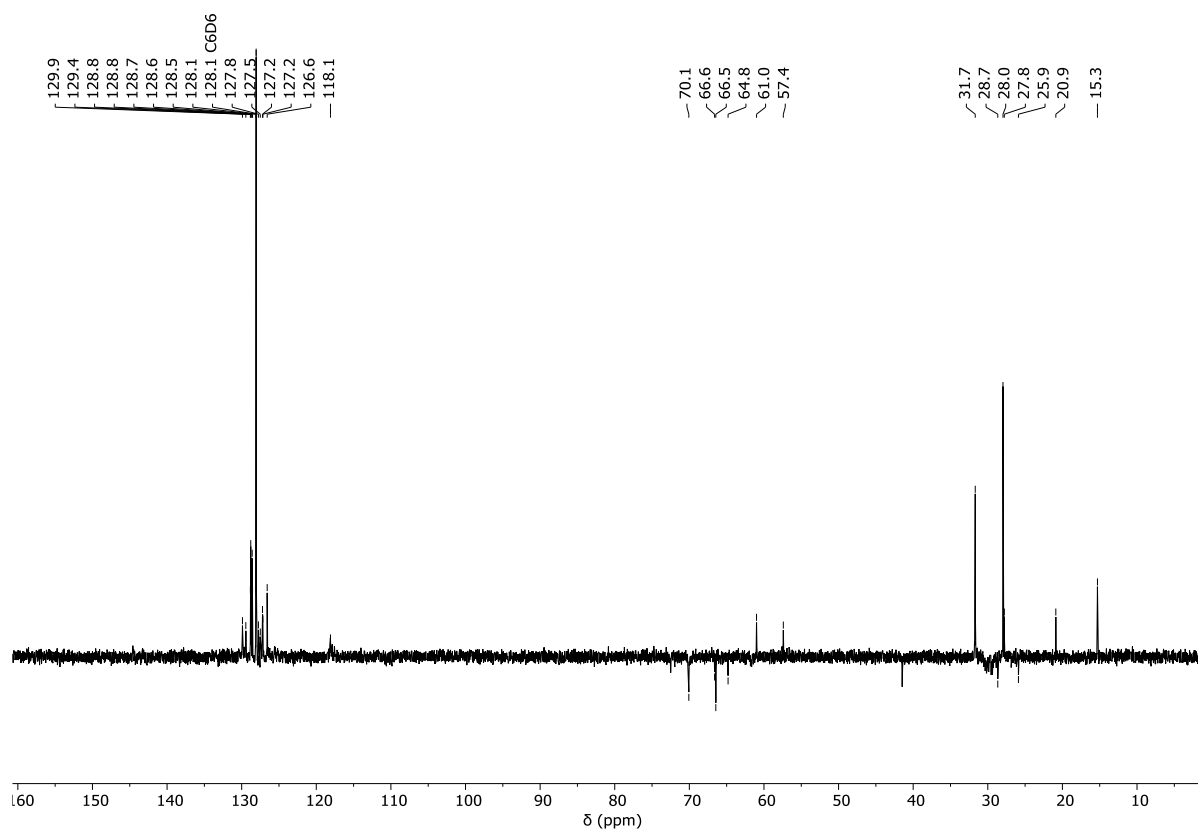

**Figure S55:**  $^{13}\text{C}$ -APT NMR spectrum (100 MHz, benzene- $d_6$ ) of [3]rotaxane  $R[(\text{TPU-ES})_2>712]$ .

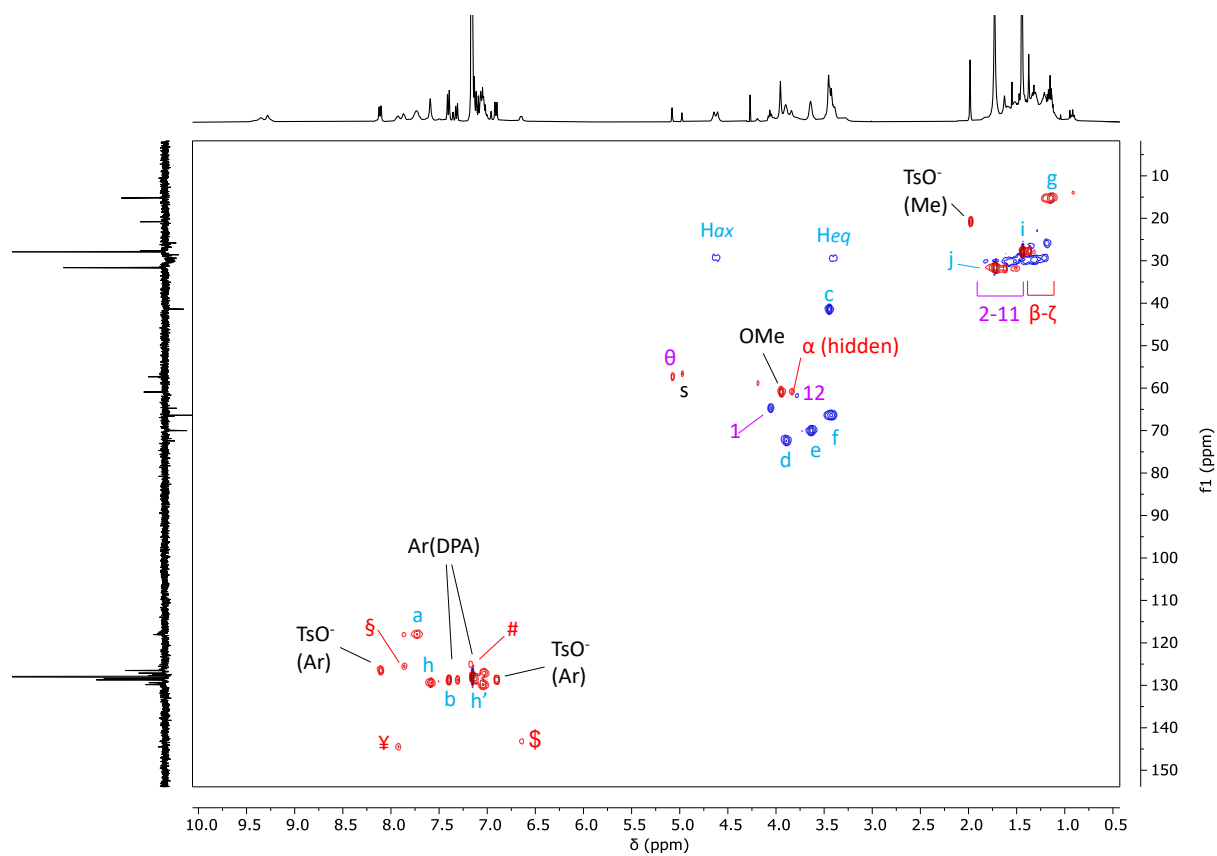

**Figure S56:** Edited HSQC NMR spectrum (400 MHz, benzene- $d_6$ ) of [3]rotaxane  $R[(\text{TPU-ES})_2>712]$ . Positive peaks ( $\text{CH}_3$  and  $\text{CH}$ ) are shown in red, while negative ones ( $\text{CH}_2$ ) are in blue.



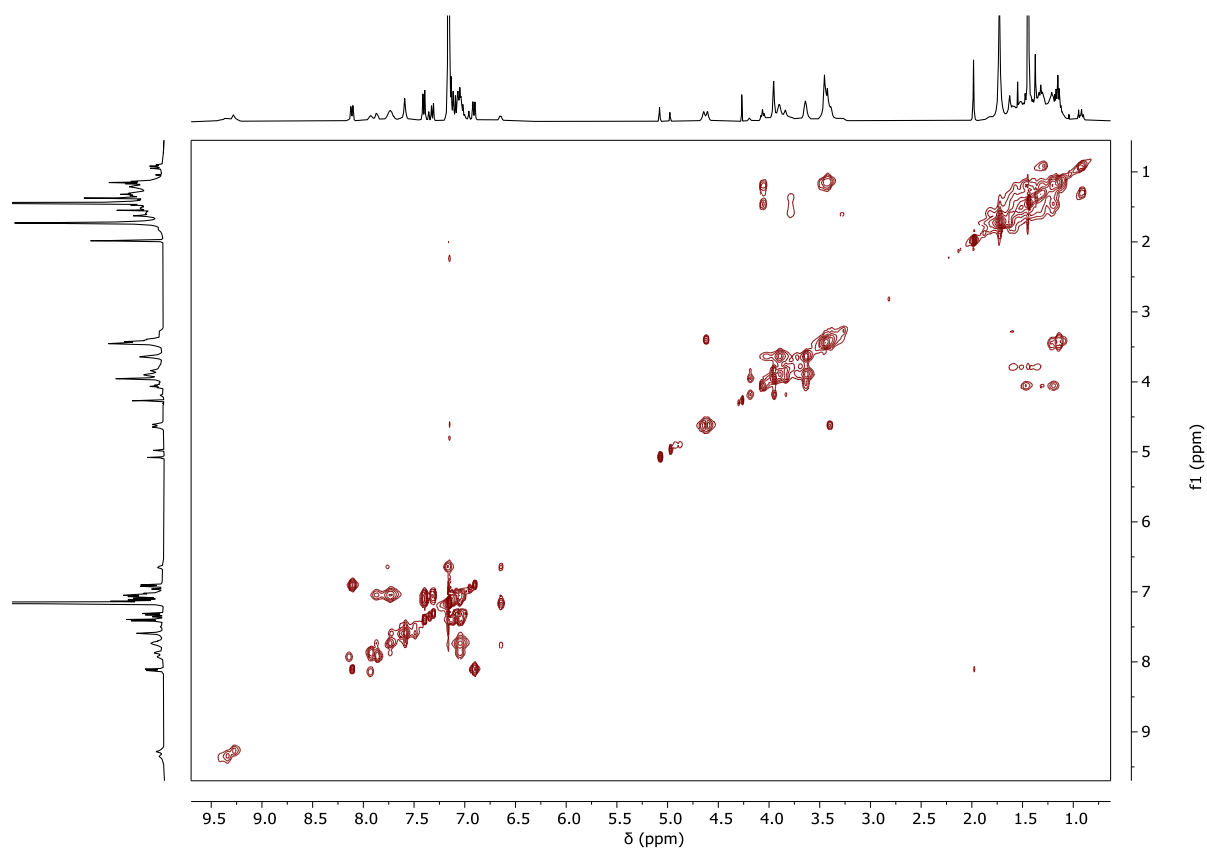

**Figure S57:** 2D TOCSY NMR spectrum (400 MHz, benzene- $d_6$ , MT = 0.06 s) of [3]rotaxane R[(TPU-ES) $_2$ 7 $_{12}$ ].

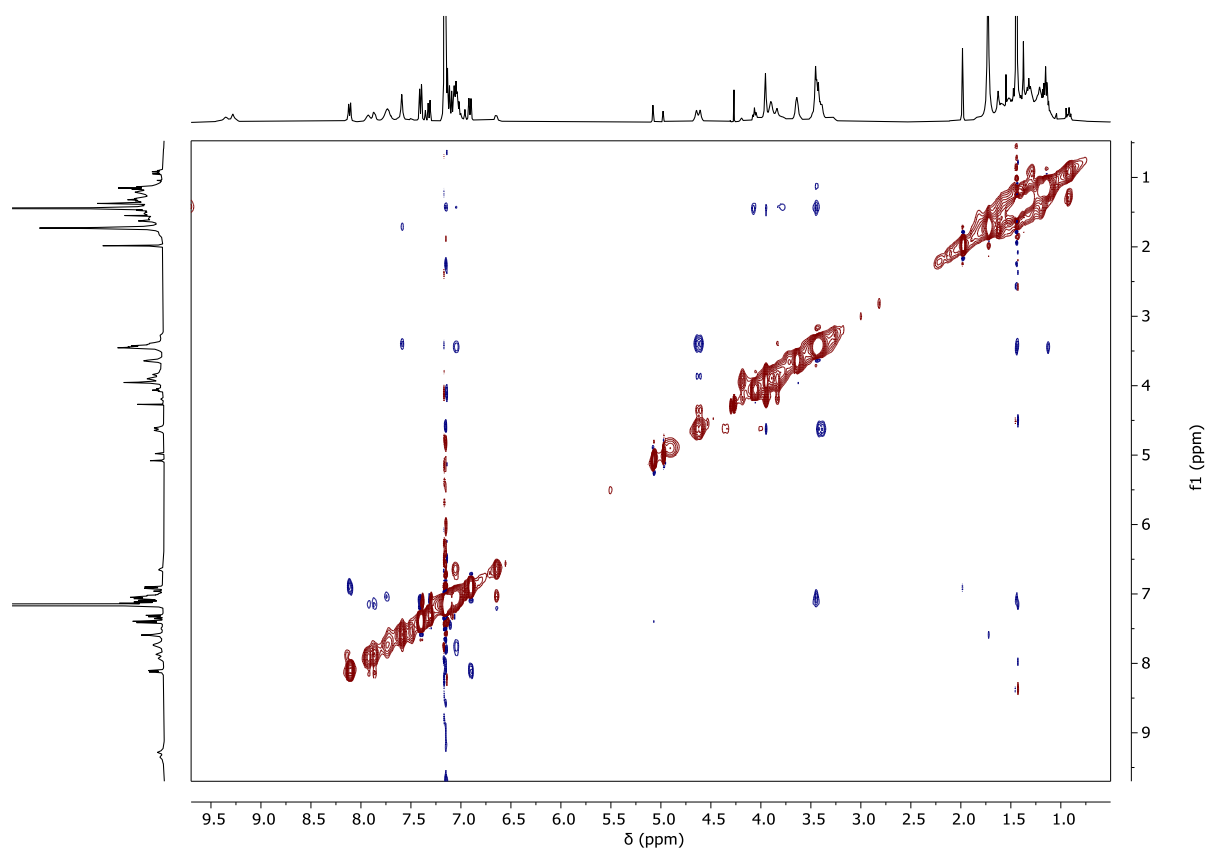

**Figure S58:** 2D ROESY NMR spectrum (400 MHz, benzene- $d_6$ , SL = 200 ms) of [3]rotaxane R[(TPU-ES) $_2$ 7 $_{12}$ ].

FCB280\_220930104818 #13-22 RT: 0.29-0.47 AV: 10 SB: 98 7.48-9.78 NL: 4.37E5  
T: FTMS + p ESI Full ms [1000.00-4000.00]

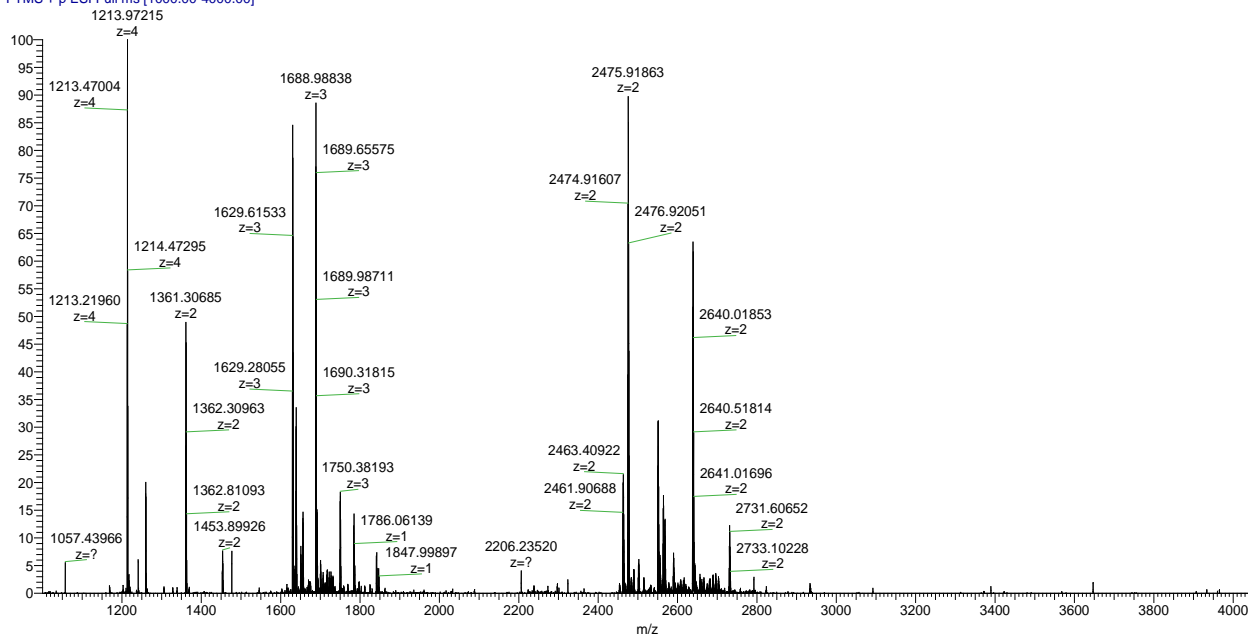

**Figure S59:** HR-MS (ESI, Orbitrap LQ) spectrum of [3]rotaxane R[(TPU-ES)<sub>2</sub>>7<sub>12</sub>] showing the quadruple, triply and doubly charged molecular.

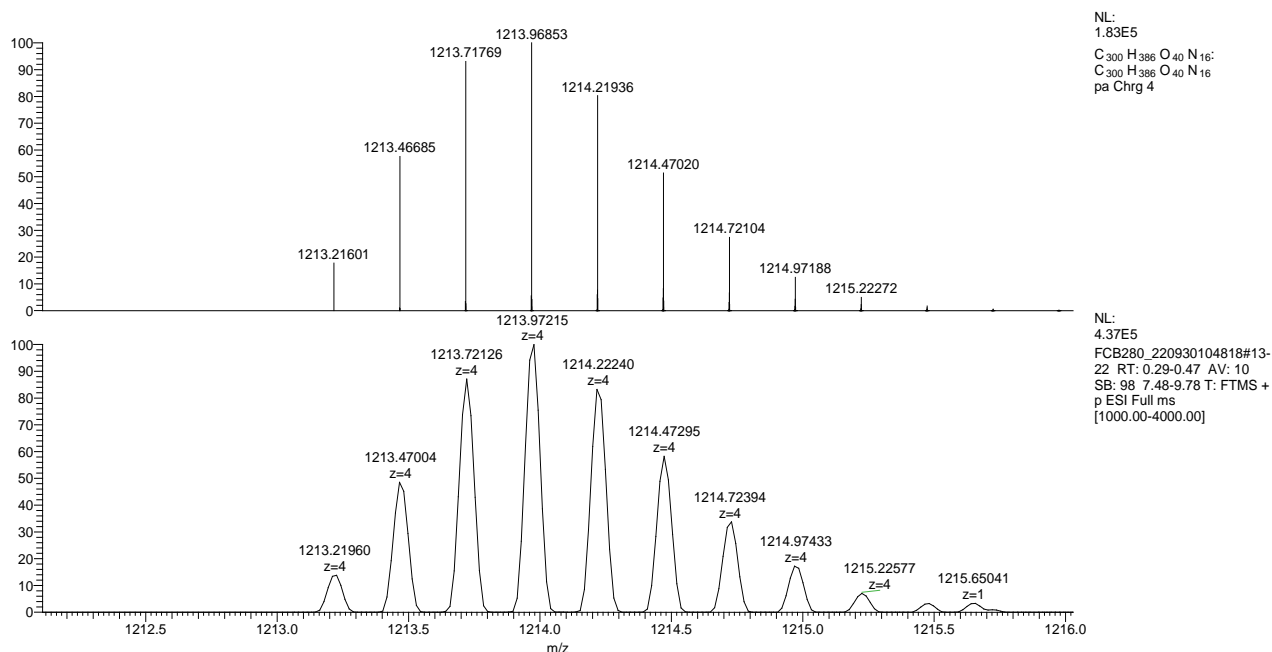

**Figure S60:** Inset of HR-MS (ESI, Orbitrap LQ) spectrum of compound R[(TPU-ES)<sub>2</sub>>7<sub>12</sub>]: calculated (top) and experimental (down) isotopic distribution for the quadruple charged molecular ion.

# Characterisation of $R[(\text{TPU-ES})_2]_{812}$

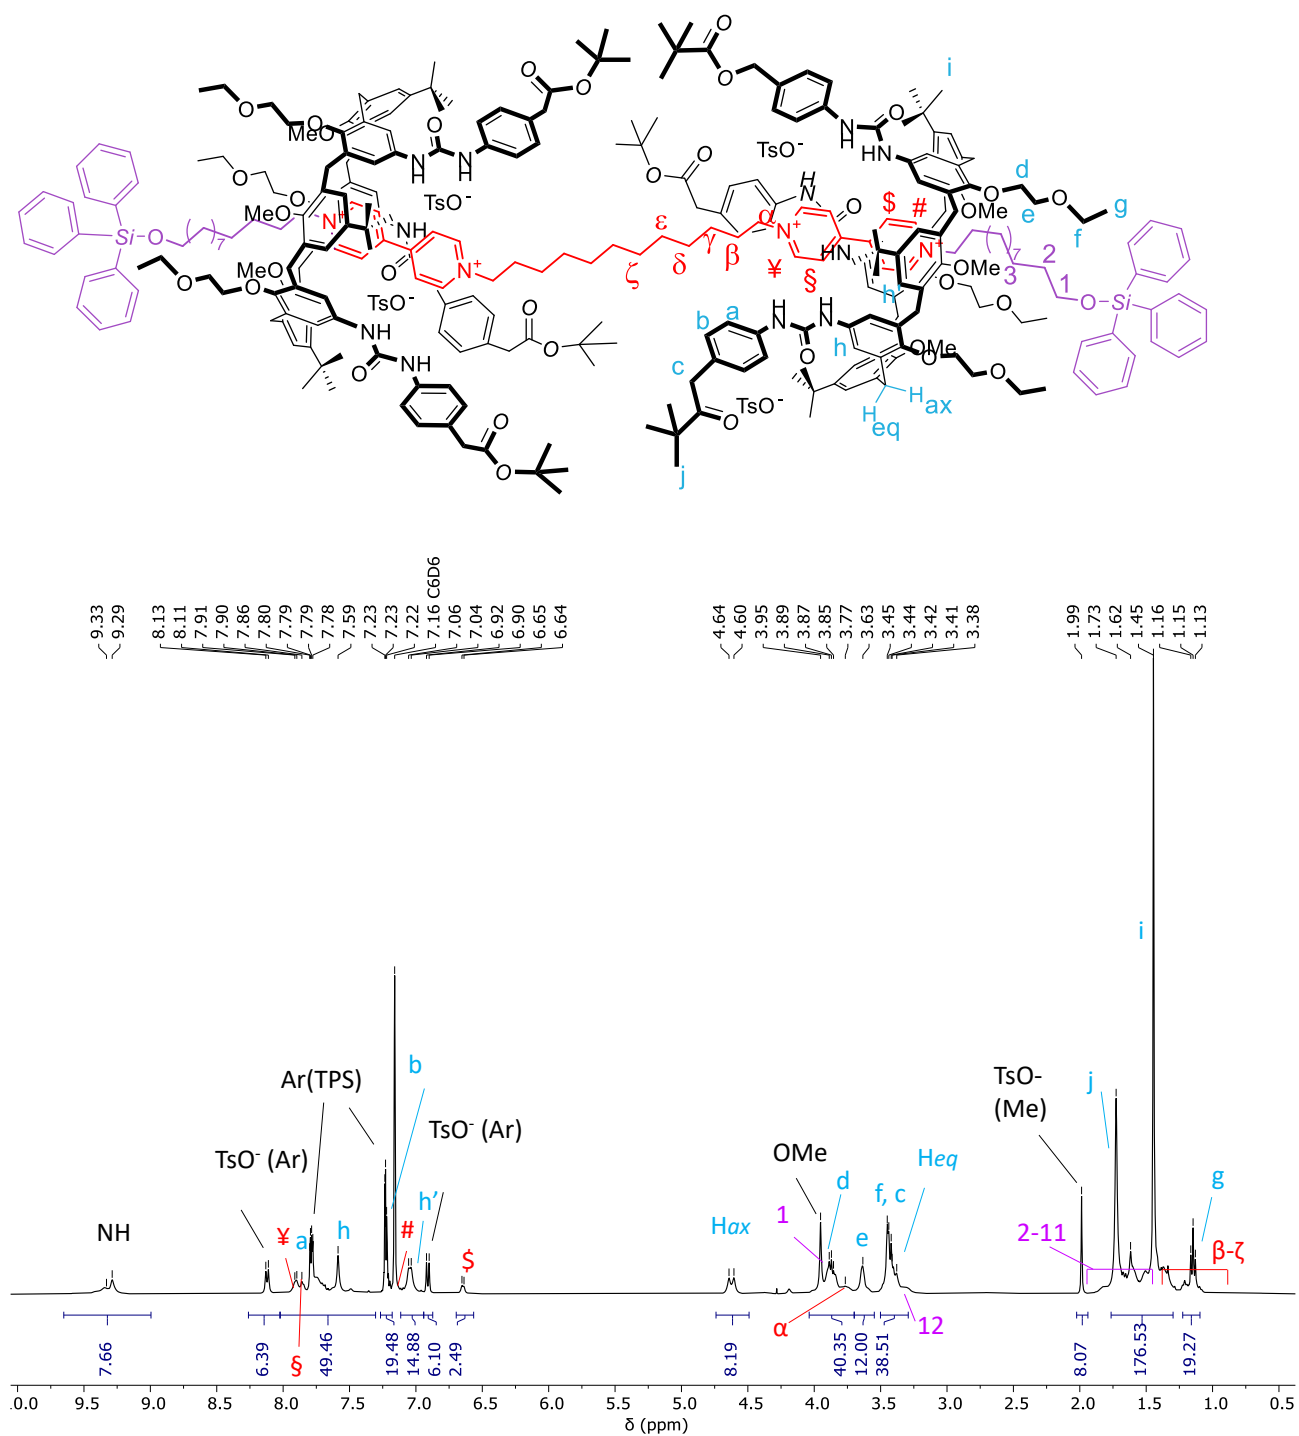

**Figure S61:**  $^1\text{H}$  NMR spectrum (400 MHz, benzene- $\text{d}_6$ ) of [3]rotaxane  $R[(\text{TPU-ES})_2]_{812}$ .

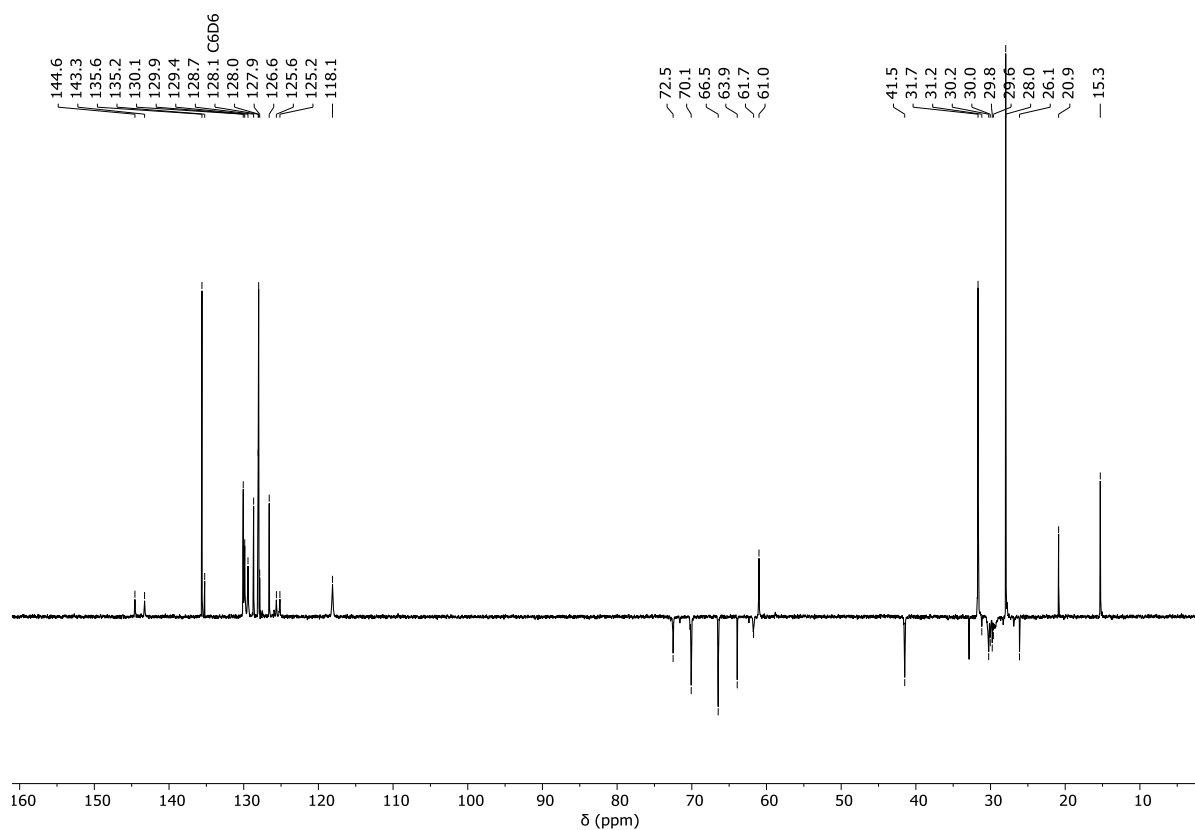

**Figure S62:**  $^{13}\text{C}$ -APT NMR spectrum (100 MHz, benzene- $d_6$ ) of [3]rotaxane  $R[(\text{TPU-ES})_2\supset 8_{12}]$

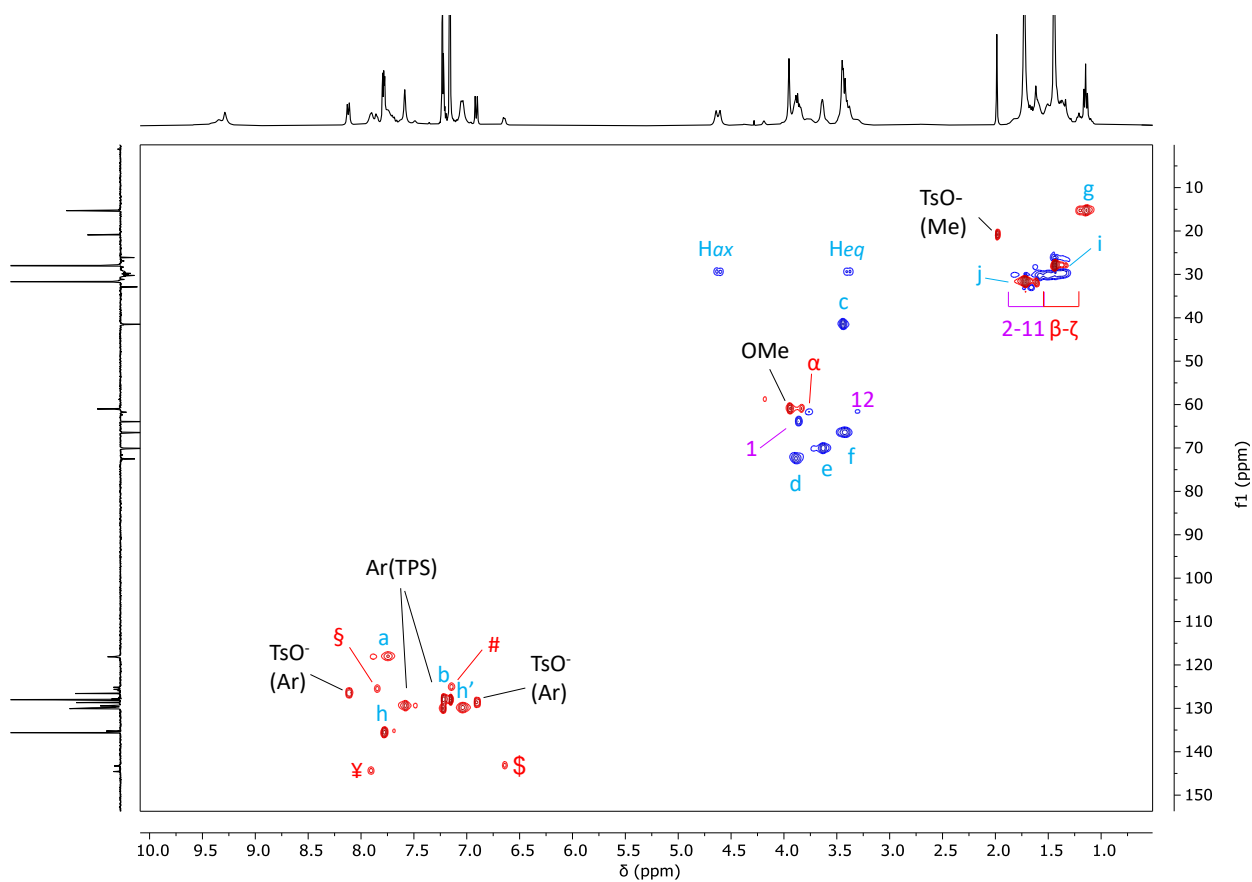

**Figure S63:** Edited HSQC NMR spectrum (400 MHz, benzene- $d_6$ ) of [3]rotaxane  $R[(\text{TPU-ES})_2\supset 8_{12}]$ . Positive peaks ( $\text{CH}_3$  and  $\text{CH}$ ) are shown in red, while negative ones ( $\text{CH}_2$ ) are in blue.

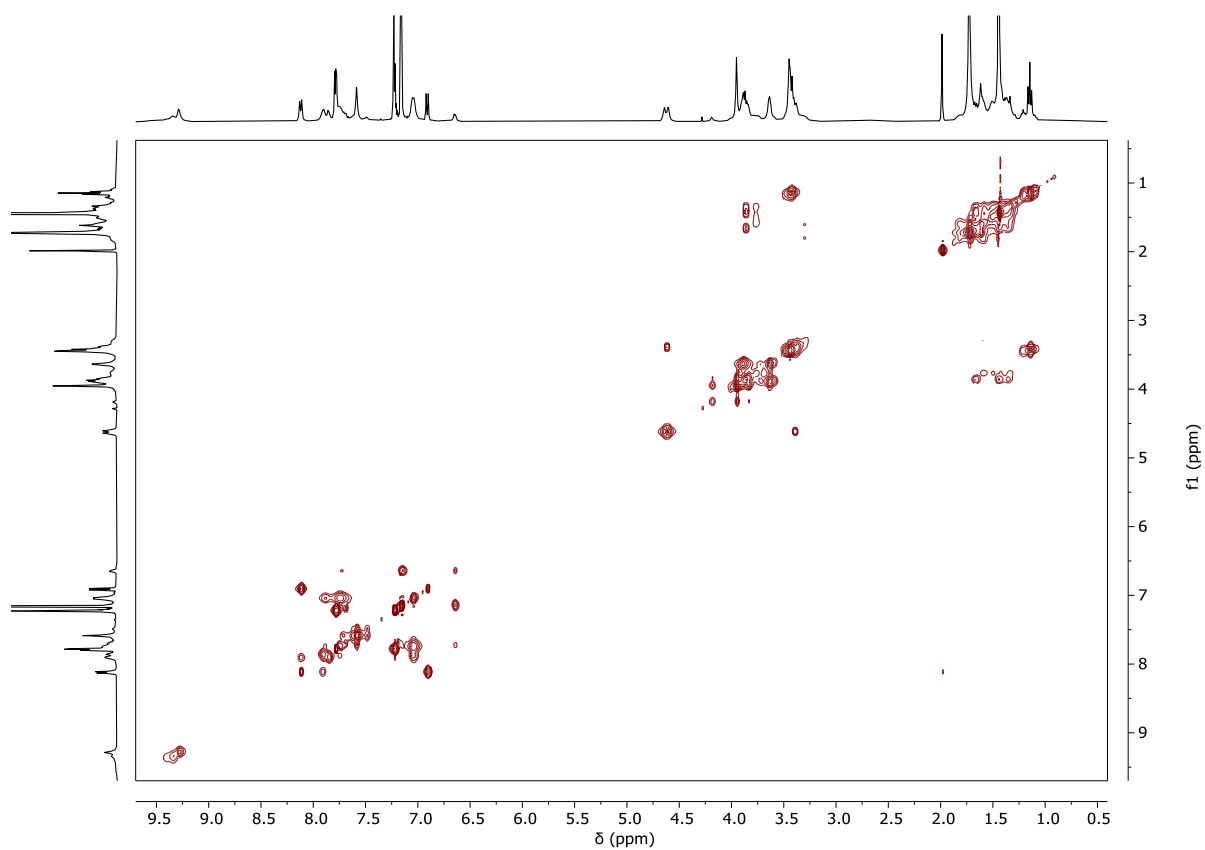

**Figure S64:** 2D TOCSY NMR spectrum (400 MHz, benzene- $d_6$ ) of [3]rotaxane  $R[(\text{TPU-ES})_2\supset 8_{12}]$ .

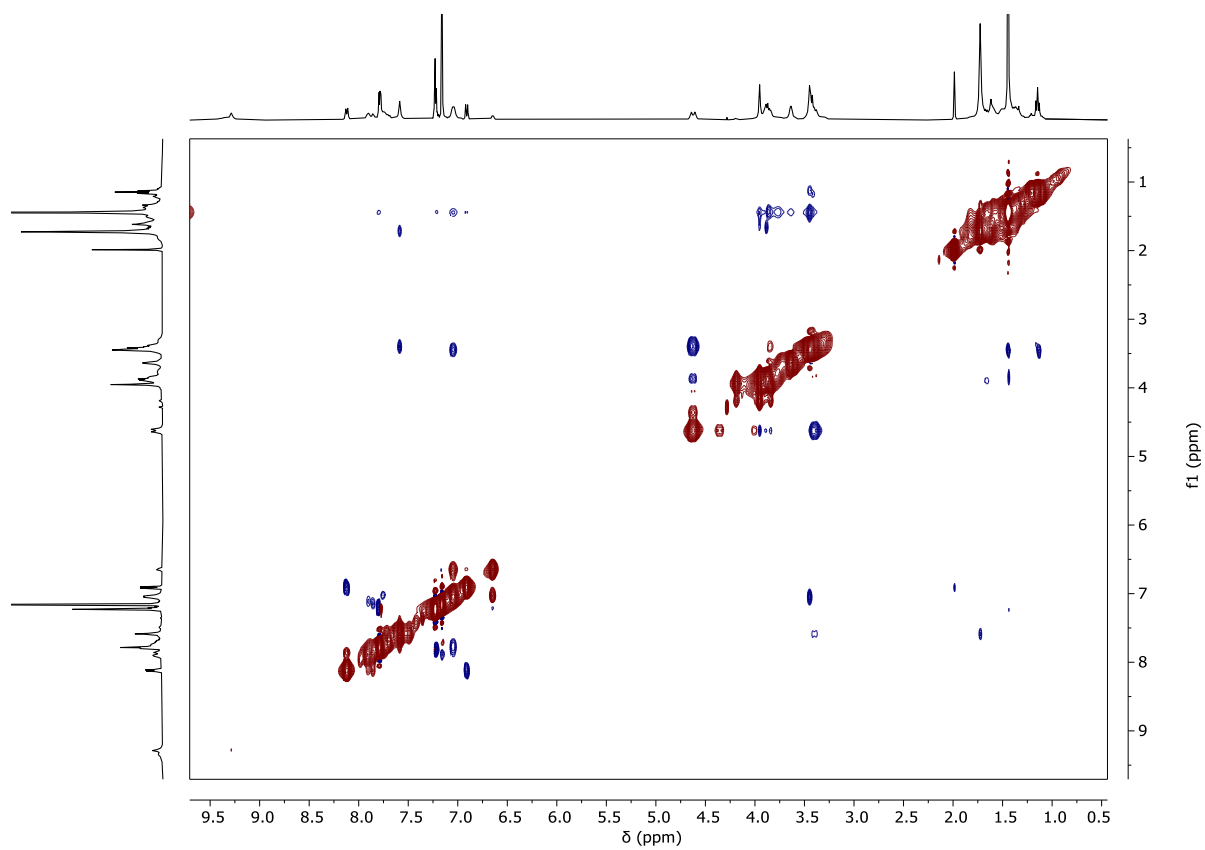

**Figure S65:** 2D ROESY NMR spectrum (400 MHz, benzene- $d_6$ , SL = 200 ms) of [3]rotaxane  $R[(\text{TPU-ES})_2\supset 8_{12}]$ .

fc289-ripreparato\_221108153427 #12 RT: 0.25 AV: 1 NL: 1.60E6  
T: FTMS + p ESI Full ms [500.00-4000.00]

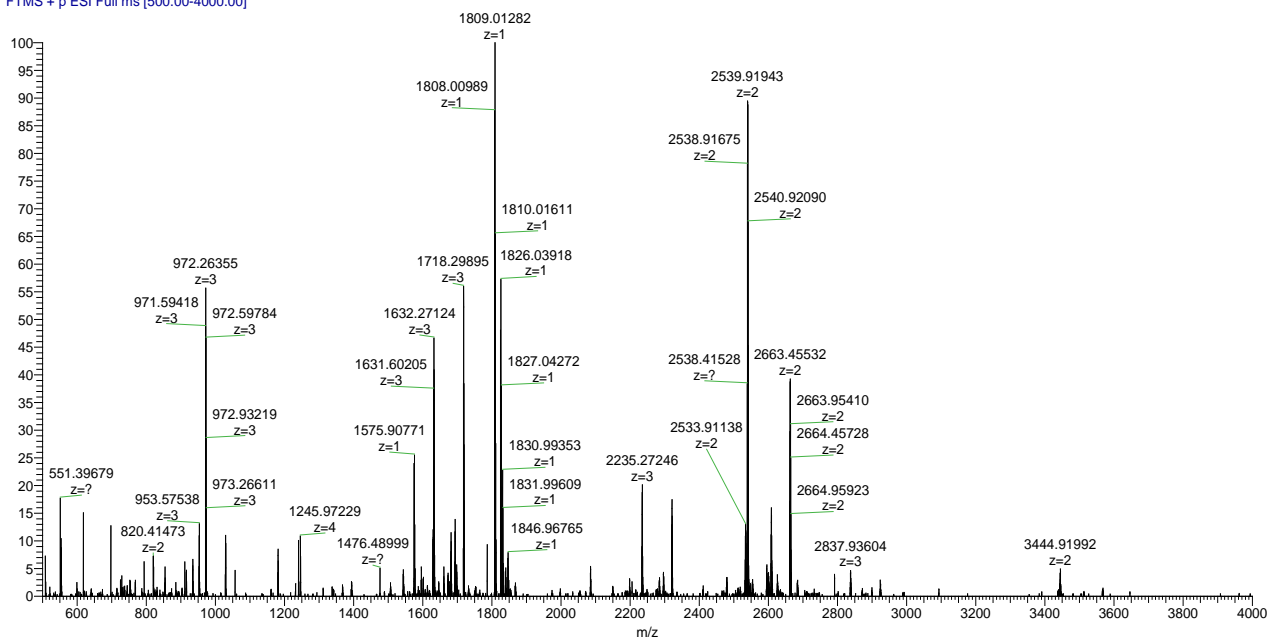

**Figure S66:** HR-MS (ESI, Orbitrap LQ) spectrum of [3]rotaxane R[(TPU-ES)<sub>2</sub>>8<sub>12</sub>] showing the quadruple, triply and doubly charged molecular.

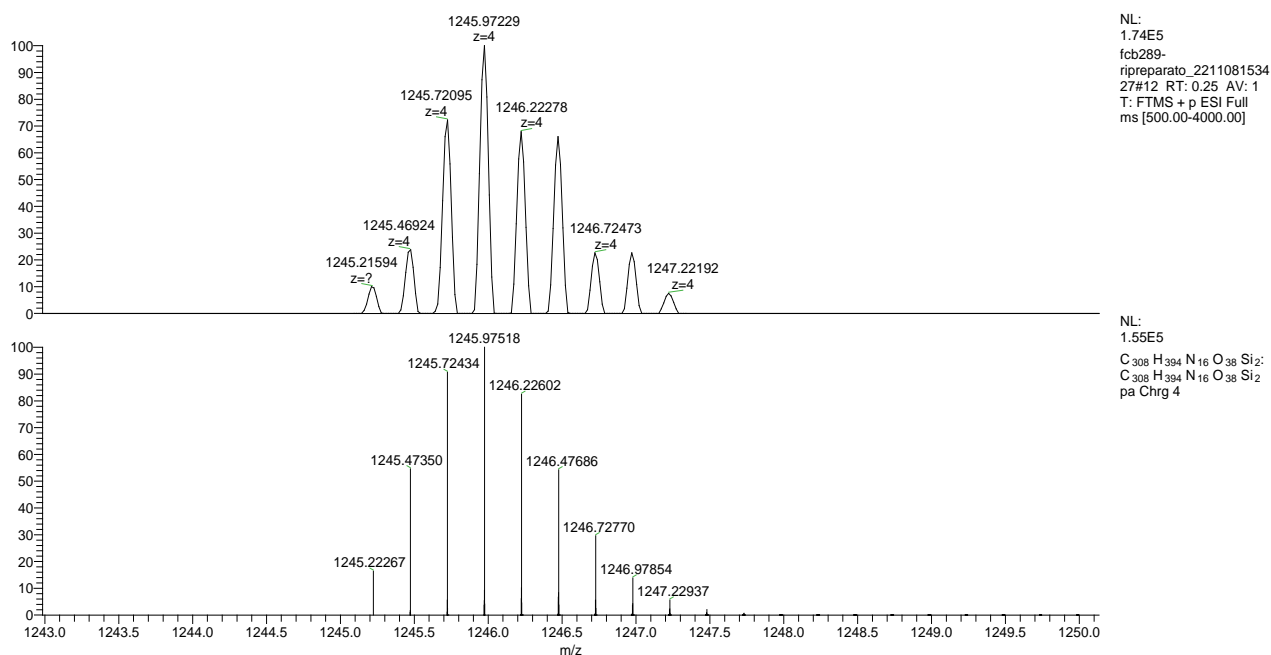

**Figure S67:** Inset of HR-MS (ESI, Orbitrap LQ) spectrum of compound R[(TPU-ES)<sub>2</sub>>8<sub>12</sub>]: calculated (top) and experimental (down) isotopic distribution for the quadruple charged molecular ion.

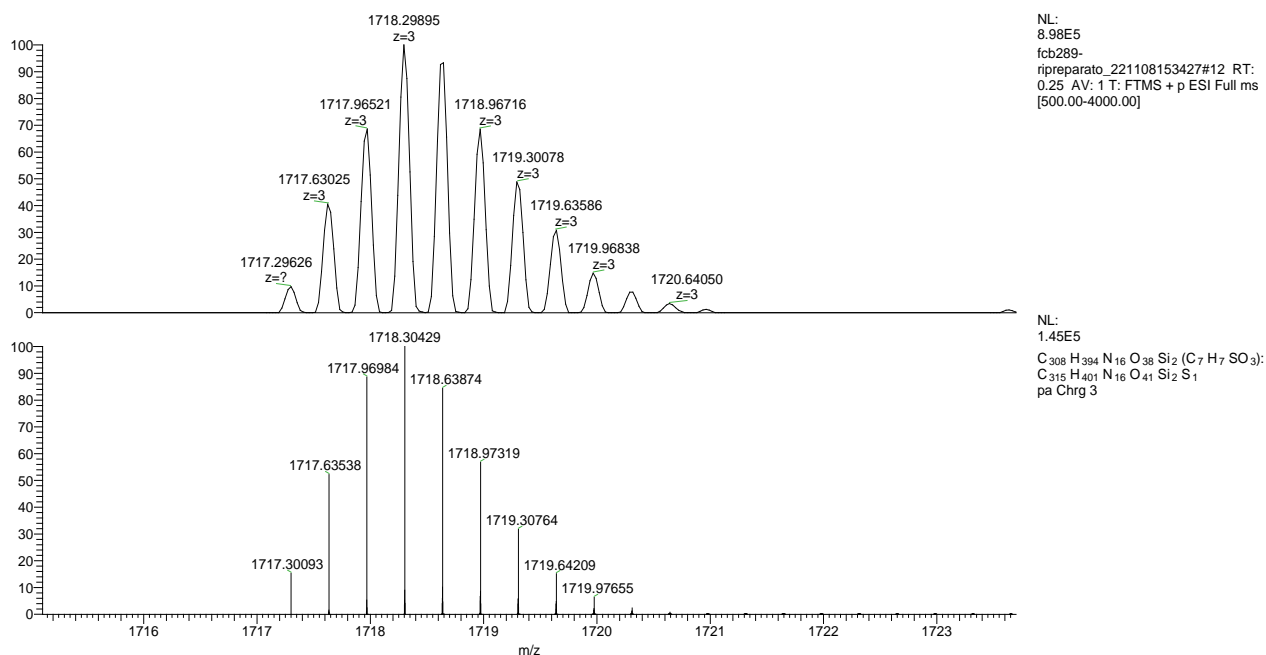

**Figure S68:** Inset of HR-MS (ESI, Orbitrap LQ) spectrum of compound  $R[(TPU-ES)_2]_{812}$ : calculated (top) and experimental (down) isotopic distribution for the triply charged molecular ion.

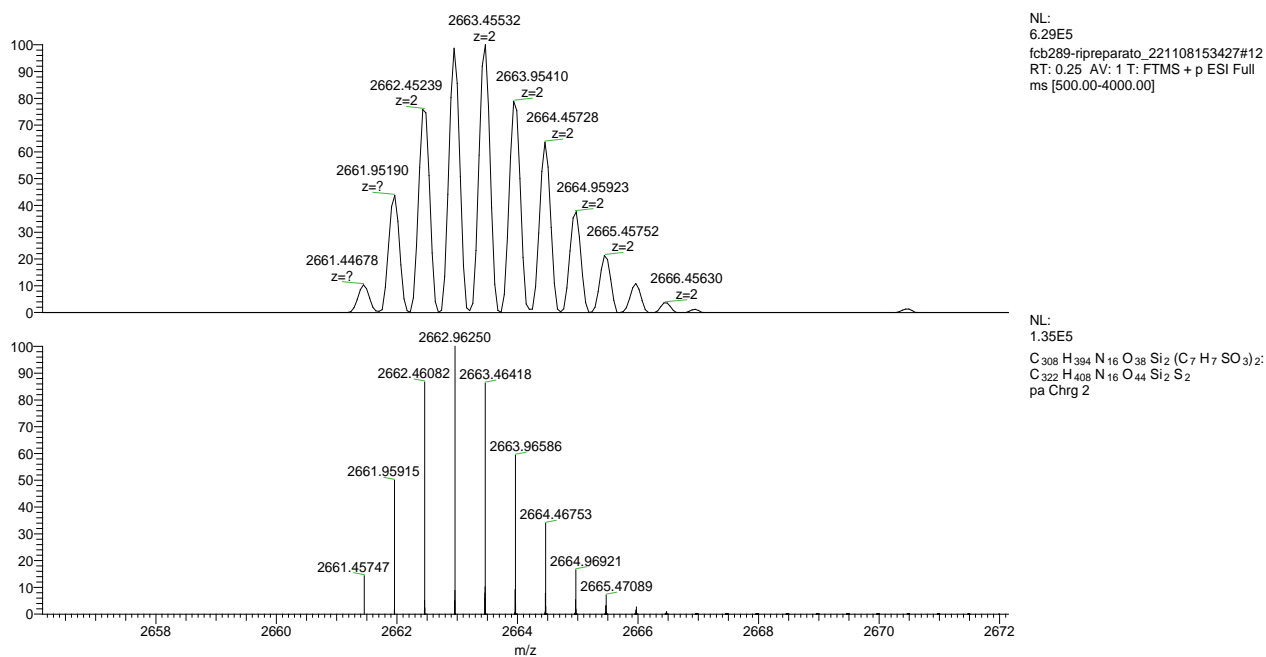

**Figure S69:** Inset of HR-MS (ESI, Orbitrap LQ) spectrum of compound  $R[(TPU-ES)_2]_{812}$ : calculated (top) and experimental (down) isotopic distribution for the doubly charged molecular ion.

# Characterisation of $R[(\text{TPU-AC})_2\supset 7_{12}]$

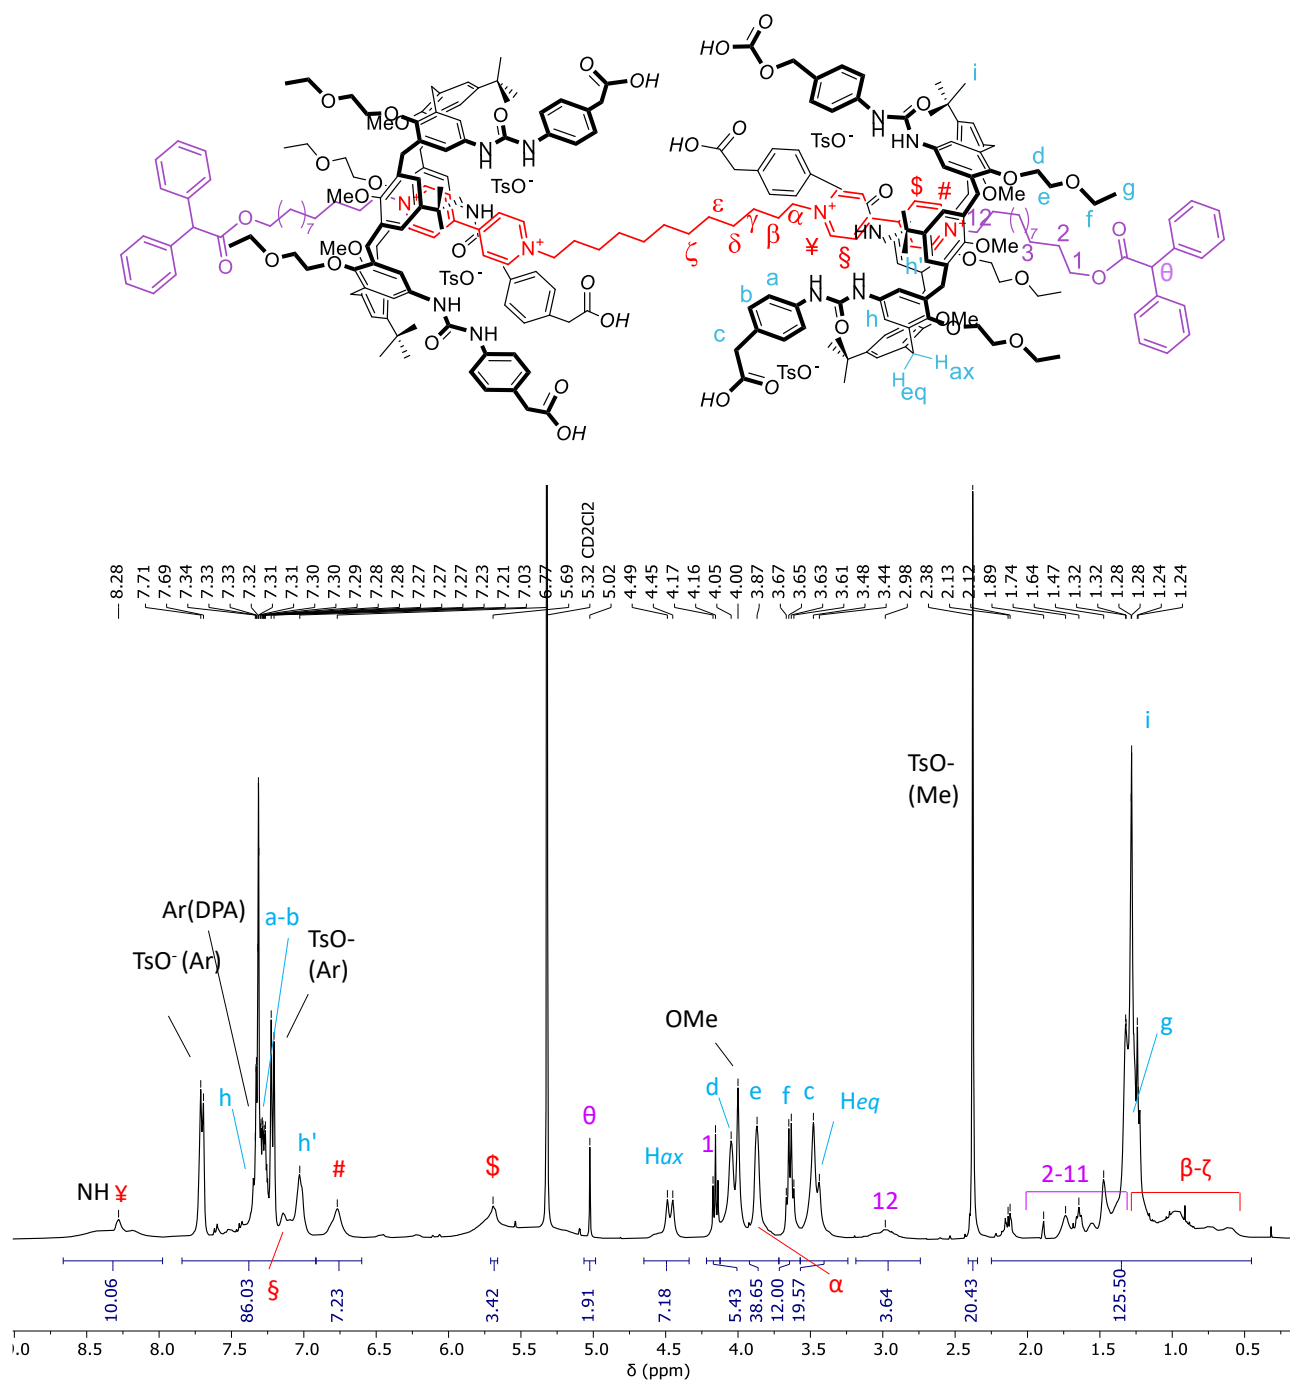

**Figure S70:**  $^1\text{H}$  NMR spectrum (400 MHz,  $\text{CD}_2\text{Cl}_2$ ) of [3]rotaxane  $R[(\text{TPU-AC})_2\supset 7_{12}]$ .



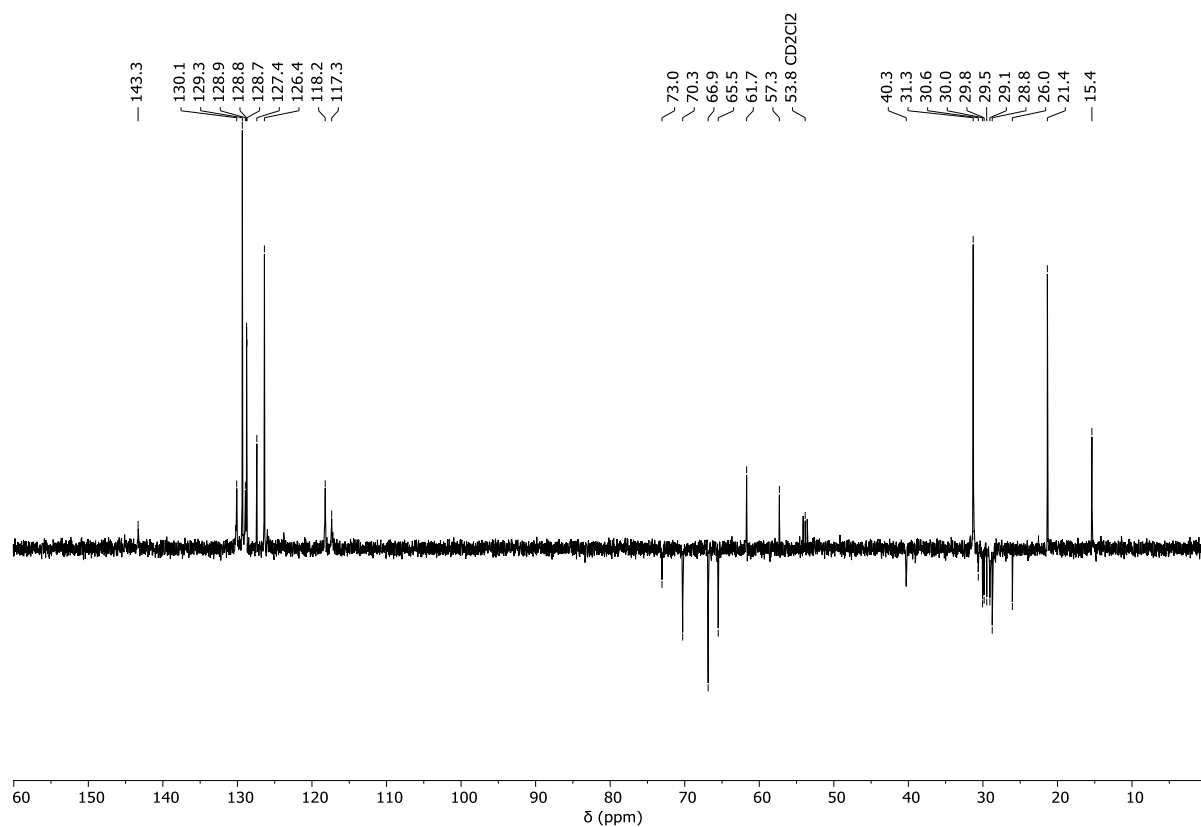

**Figure S71:**  $^{13}\text{C}$  NMR spectrum (100 MHz,  $\text{CD}_2\text{Cl}_2$ ) of [3]rotaxane  $R[(\text{TPU-AC})_2>7]_{12}$ .

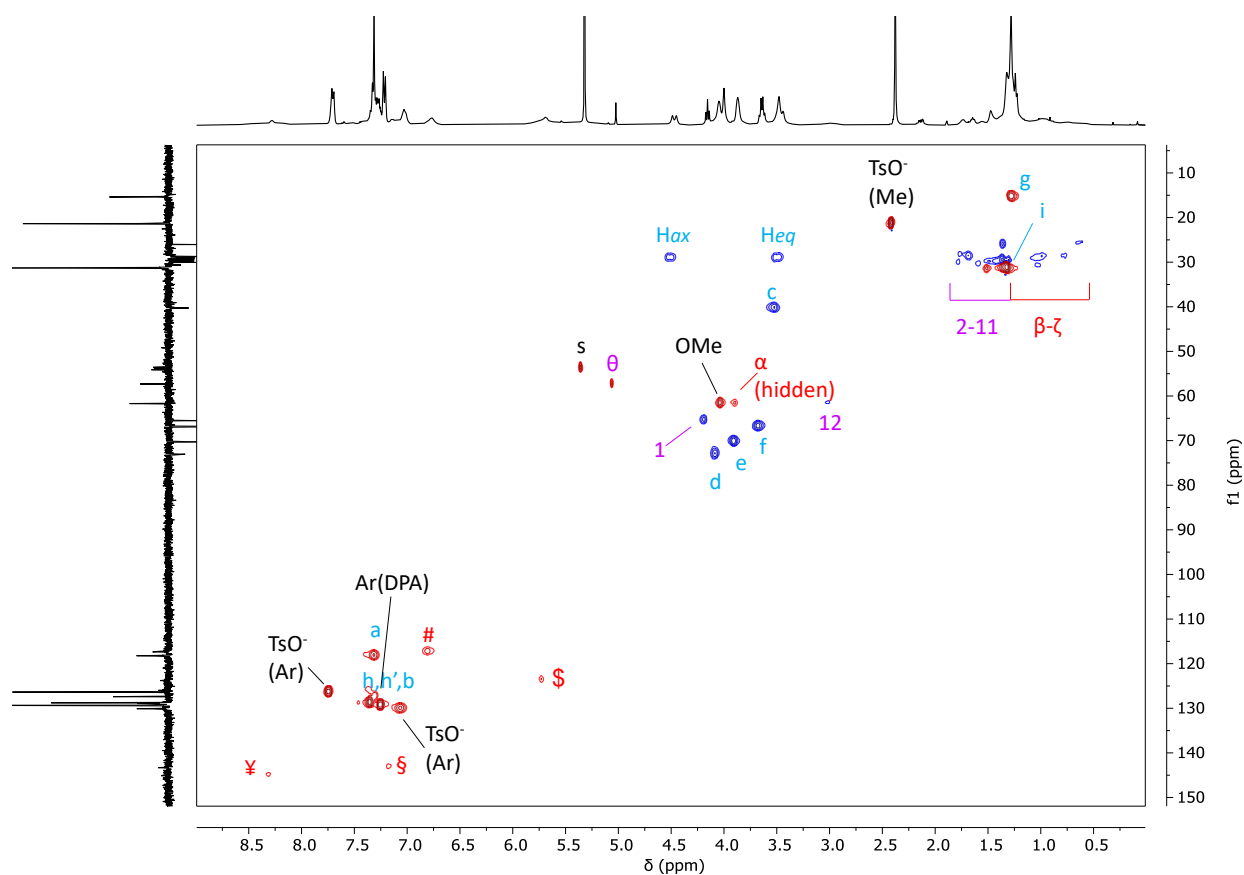

**Figure S72:** Edited HSQC NMR spectrum (400 MHz,  $\text{CD}_2\text{Cl}_2$ ) of [3]rotaxane  $R[(\text{TPU-AC})_2>8]_{12}$ . Positive peaks ( $\text{CH}_3$  and  $\text{CH}$ ) are shown in red, while negative ones ( $\text{CH}_2$ ) are in blue.

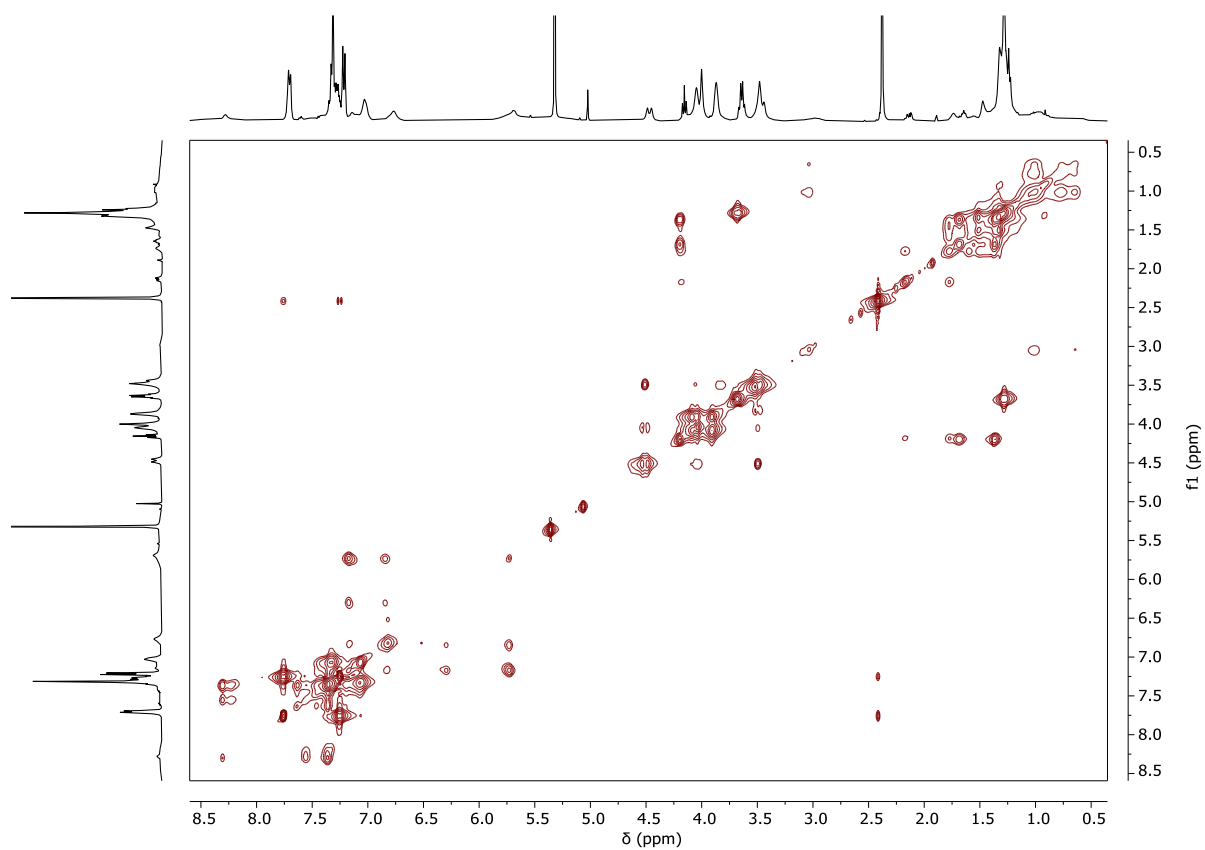

**Figure S73:** 2D TOCSY NMR spectrum (400 MHz,  $\text{CD}_2\text{Cl}_2$ , MT = 0.06 s) of [3]rotaxane  $R[(\text{TPU-AC})_2\text{D}712]$ .

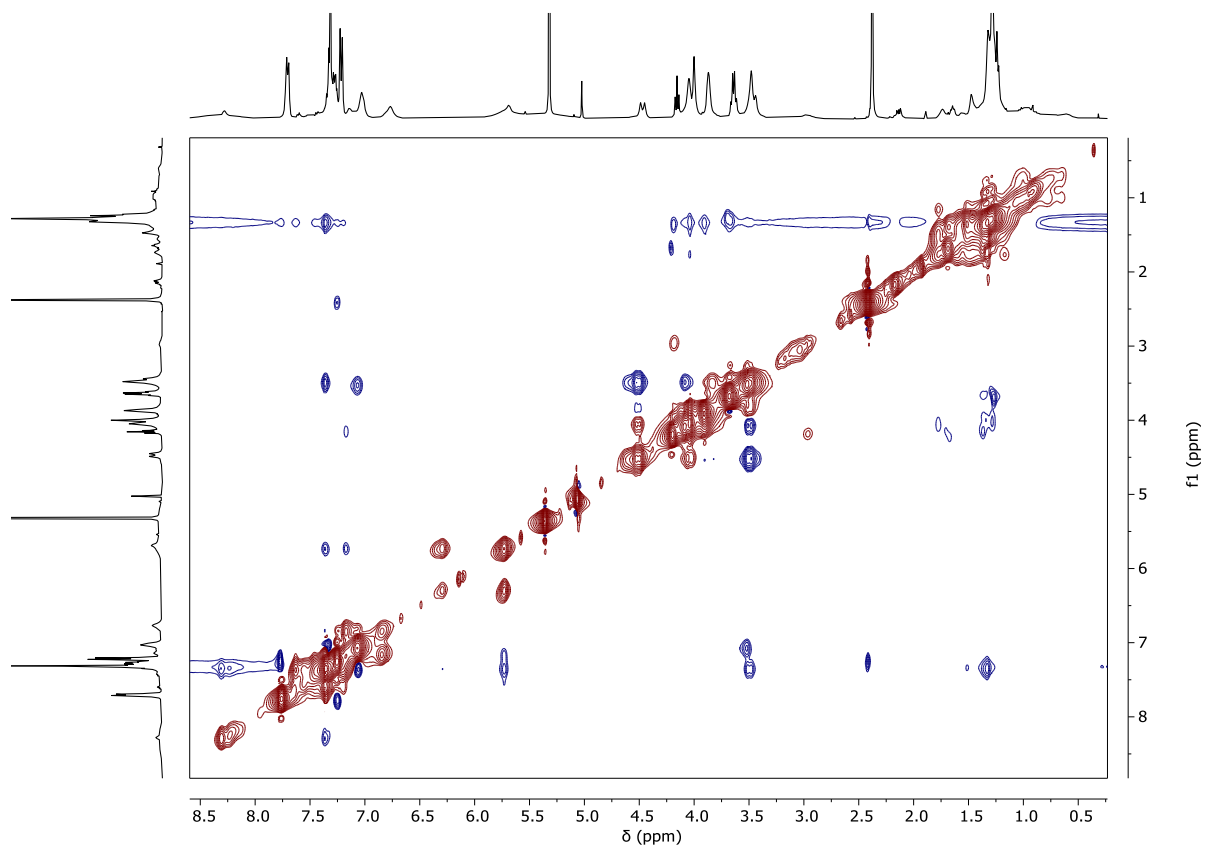

**Figure S74:** 2D ROESY NMR spectrum (400 MHz,  $\text{CD}_2\text{Cl}_2$ , SL = 200 ms) of [3]rotaxane  $R[(\text{TPU-AC})_2\text{D}712]$ .

fc283\_221107120509 #19-25 RT: 0.41-0.51 AV: 7 NL: 1.03E7  
T: FTMS + p ESI Full ms [1000.00-3000.00]

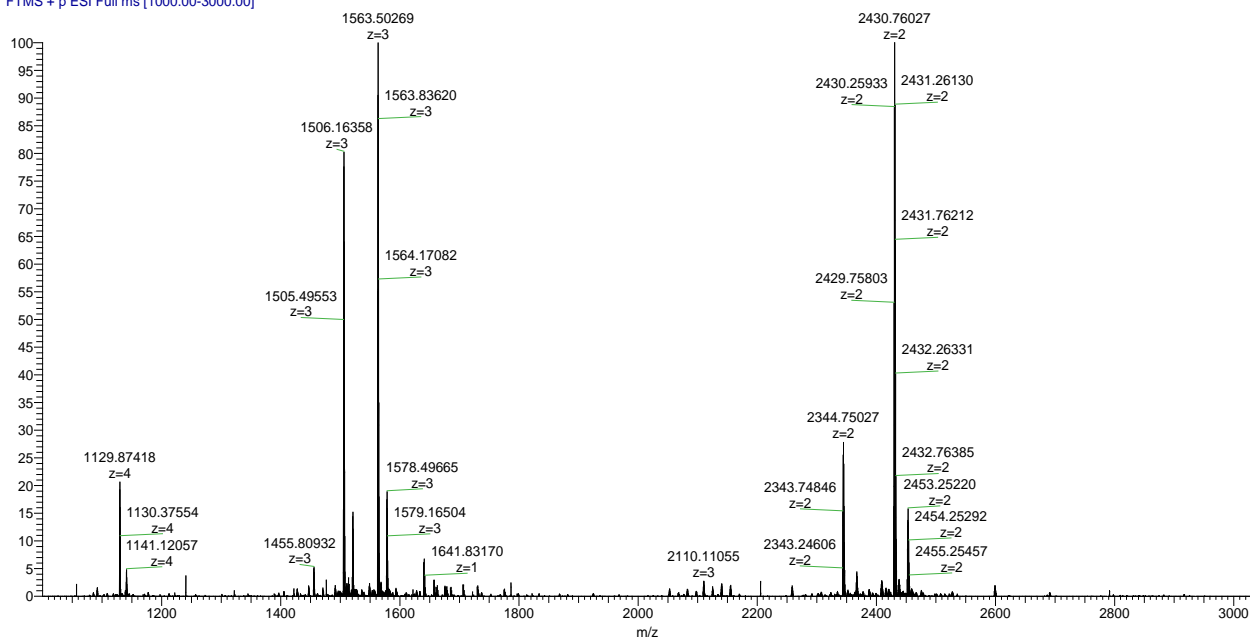

**Figure S75:** HR-MS (ESI, Orbitrap LQ) spectrum of [3]rotaxane R[(TPU-AC)<sub>2</sub>>8<sub>12</sub>] showing the quadruple, triply and doubly charged molecular.

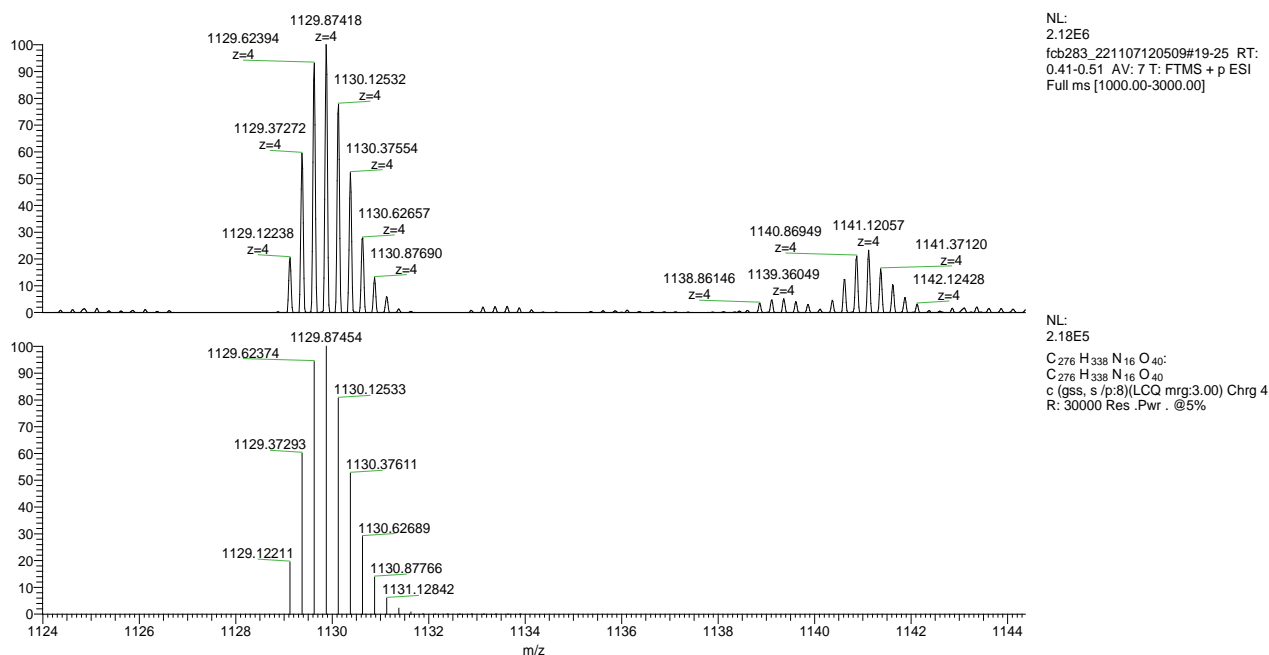

**Figure S76:** Inset of HR-MS (ESI, Orbitrap LQ) spectrum of compound R[(TPU-AC)<sub>2</sub>>8<sub>12</sub>]: calculated (top) and experimental (down) isotopic distribution for the quadruple charged molecular ion.

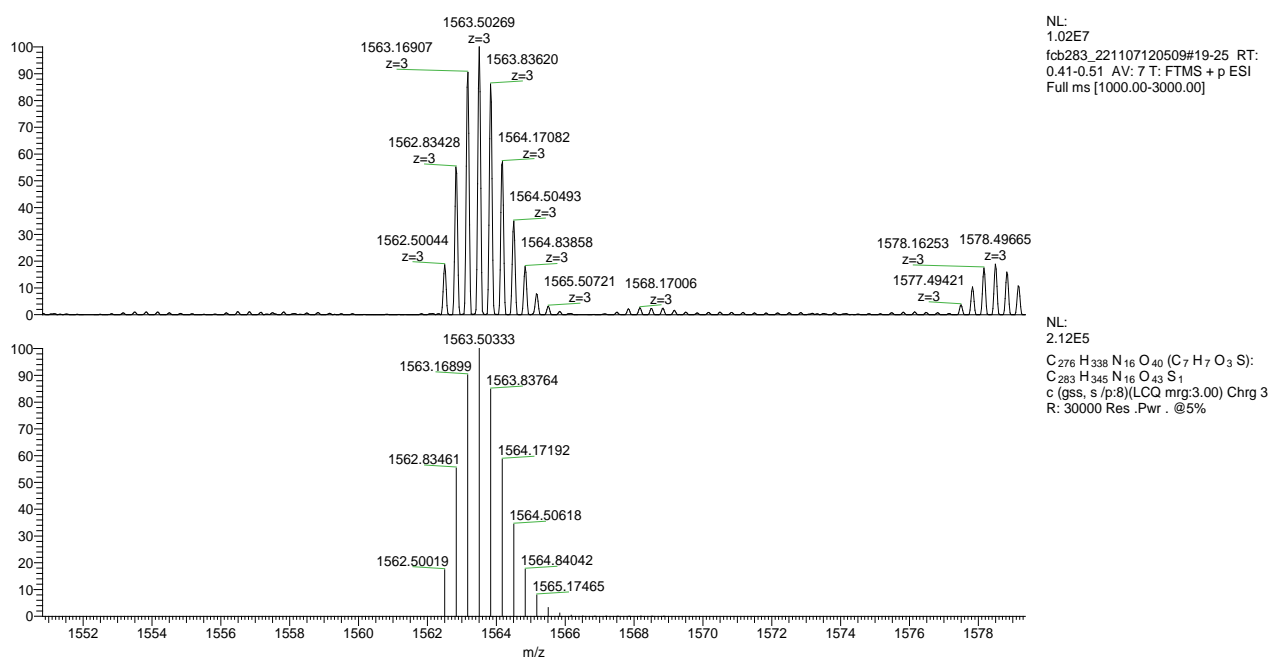

**Figure S77:** Inset of HR-MS (ESI, Orbitrap LQ) spectrum of compound  $R[(\text{TPU-AC})_2]_{812}$ : calculated (top) and experimental (down) isotopic distribution for the triply charged molecular ion.

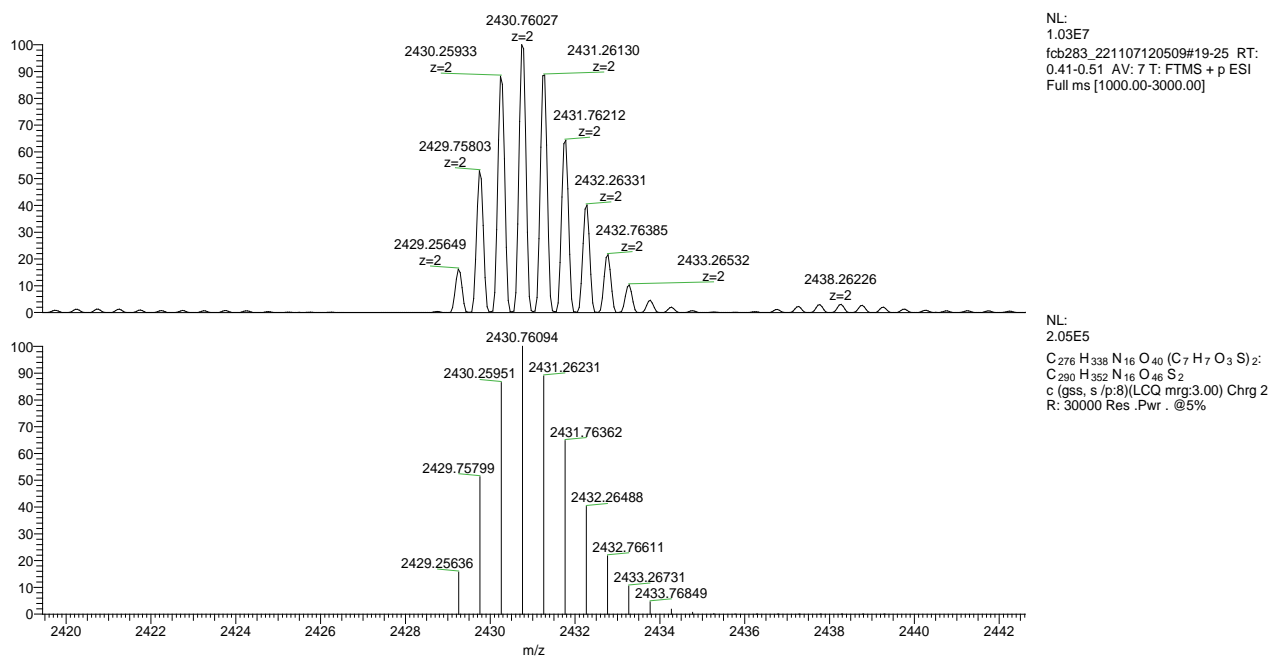

**Figure S78:** Inset of HR-MS (ESI, Orbitrap LQ) spectrum of compound  $R[(\text{TPU-AC})_2]_{812}$ : calculated (top) and experimental (down) isotopic distribution for the doubly charged molecular ion.
